# Supplementary material
Source: publisher figshare collection journal article supplement (https://gsajournals.figshare.com/ndownloader/files/14094053)
Supplement: Supplementary file 1 [file 14094053]

uniqueRunID	worm	wormID	strain	Clade	reartemp	date	run	Droplet Temp (corrected)	TotalGoodFrames (of 300)	Area	Fast Locomotion Index (LI1)	Min(Fast Locomotion Index)	Slow Locomotion Index (LI7)	Min(Slow Locomotion Index)	Paralyzed (=0, motile=1)
wormd20150521s34NIC20VX0034rt16w01r00	0	NIC20.1491	NIC20	Taiwan	16	5/21/15	0	25.03423265	293	349.553333	0.4168749	0.057000401	0.85530892	0.056846952	1
wormd20150521s34NIC20VX0034rt16w01r01	0	NIC20.1491	NIC20	Taiwan	16	5/21/15	1	26.09545714	239	237.138996	0.59811453	0.057000401	0.88073457	0.056846952	1
wormd20150521s34NIC20VX0034rt16w01r02	0	NIC20.1491	NIC20	Taiwan	16	5/21/15	2	27.15668163	251	259.770073	0.62658129	0.057000401	0.87200129	0.056846952	1
wormd20150521s34NIC20VX0034rt16w01r03	0	NIC20.1491	NIC20	Taiwan	16	5/21/15	3	28.21790612	287	336.877551	0.48037149	0.057000401	0.8557633	0.056846952	1
wormd20150521s34NIC20VX0034rt16w01r04	0	NIC20.1491	NIC20	Taiwan	16	5/21/15	4	29.27913061	261	343.6121	0.41003536	0.057000401	0.84576204	0.056846952	1
wormd20150521s34NIC20VX0034rt16w01r05	0	NIC20.1491	NIC20	Taiwan	16	5/21/15	5	30.3403551	285	304.633562	0.32674543	0.057000401	0.85098905	0.056846952	1
wormd20150521s34NIC20VX0034rt16w01r06	0	NIC20.1491	NIC20	Taiwan	16	5/21/15	6	31.40157959	293	355.726667	0.17745461	0.057000401	0.66896035	0.056846952	1
wormd20150521s34NIC20VX0034rt16w01r07	0	NIC20.1491	NIC20	Taiwan	16	5/21/15	7	32.46280408	293	352.243333	0.2278551	0.057000401	0.78016169	0.056846952	1
wormd20150521s34NIC20VX0034rt16w01r08	0	NIC20.1491	NIC20	Taiwan	16	5/21/15	8	33.52402857	293	346.916667	0.20106191	0.057000401	0.75203622	0.056846952	1
wormd20150521s34NIC20VX0034rt16w01r09	0	NIC20.1491	NIC20	Taiwan	16	5/21/15	9	34.58525306	286	326.610922	0.16943813	0.057000401	0.66838495	0.056846952	1
wormd20150521s34NIC20VX0034rt16w01r10	0	NIC20.1491	NIC20	Taiwan	16	5/21/15	10	35.64647755	293	311.573333	0.08404184	0.057000401	0.22873336	0.056846952	1
wormd20150521s34NIC20VX0034rt16w01r11	0	NIC20.1491	NIC20	Taiwan	16	5/21/15	11	36.70770204	293	287.976667	0.07051468	0.057000401	0.07255804	0.056846952	0
wormd20150521s34NIC20VX0034rt16w01r12	0	NIC20.1491	NIC20	Taiwan	16	5/21/15	12	37.76892653	293	314.3	0.06517221	0.057000401	0.06499595	0.056846952	0
wormd20150521s34NIC20VX0034rt16w01r13	0	NIC20.1491	NIC20	Taiwan	16	5/21/15	13	38.83015102	293	319.603333	0.0570004	0.057000401	0.05684695	0.056846952	0
wormd20150521s34NIC20VX0034rt16w01r14	0	NIC20.1491	NIC20	Taiwan	16	5/21/15	14	39.89137551	293	312.47	0.06503946	0.057000401	0.06514197	0.056846952	0
wormd20150521s34NIC20VX0034rt16w01r15	0	NIC20.1491	NIC20	Taiwan	16	5/21/15	15	40.9526	293	311.173333	0.06555796	0.057000401	0.06760814	0.056846952	0
wormd20150521s34NIC20VX0034rt16w02r00	1	NIC20.1492	NIC20	Taiwan	16	5/21/15	0	25.03423265	293	536.963333	0.44393747	0.074612907	0.69582571	0.075084976	1
wormd20150521s34NIC20VX0034rt16w02r01	1	NIC20.1492	NIC20	Taiwan	16	5/21/15	1	26.09545714	278	516	0.45106498	0.074612907	0.7265291	0.075084976	1
wormd20150521s34NIC20VX0034rt16w02r02	1	NIC20.1492	NIC20	Taiwan	16	5/21/15	2	27.15668163	198	470.297561	0.45657923	0.074612907	0.72053674	0.075084976	1
wormd20150521s34NIC20VX0034rt16w02r03	1	NIC20.1492	NIC20	Taiwan	16	5/21/15	3	28.21790612	200	455.135922	0.36260781	0.074612907	0.56965411	0.075084976	1
wormd20150521s34NIC20VX0034rt16w02r04	1	NIC20.1492	NIC20	Taiwan	16	5/21/15	4	29.27913061	181	520.898936	0.44426605	0.074612907	0.80361423	0.075084976	1
wormd20150521s34NIC20VX0034rt16w02r06	1	NIC20.1492	NIC20	Taiwan	16	5/21/15	6	31.40157959	293	528.796667	0.30504402	0.074612907	0.80081374	0.075084976	1
wormd20150521s34NIC20VX0034rt16w02r07	1	NIC20.1492	NIC20	Taiwan	16	5/21/15	7	32.46280408	293	555.373333	0.25825545	0.074612907	0.81136423	0.075084976	1
wormd20150521s34NIC20VX0034rt16w02r08	1	NIC20.1492	NIC20	Taiwan	16	5/21/15	8	33.52402857	293	508.02	0.19282855	0.074612907	0.70919917	0.075084976	1
wormd20150521s34NIC20VX0034rt16w02r09	1	NIC20.1492	NIC20	Taiwan	16	5/21/15	9	34.58525306	240	490.719101	0.13771983	0.074612907	0.54438807	0.075084976	1
wormd20150521s34NIC20VX0034rt16w02r10	1	NIC20.1492	NIC20	Taiwan	16	5/21/15	10	35.64647755	293	557.456667	0.0841278	0.074612907	0.08840861	0.075084976	0
wormd20150521s34NIC20VX0034rt16w02r11	1	NIC20.1492	NIC20	Taiwan	16	5/21/15	11	36.70770204	293	573.46	0.07461291	0.074612907	0.07508498	0.075084976	0
wormd20150521s34NIC20VX0034rt16w03r00	2	NIC20.1493	NIC20	Taiwan	16	5/21/15	0	25.03423265	281	600.84375	0.46543778	0.062854859	0.68268522	0.063168678	1
wormd20150521s34NIC20VX0034rt16w03r01	2	NIC20.1493	NIC20	Taiwan	16	5/21/15	1	26.09545714	164	589.789474	0.41760594	0.062854859	0.55743035	0.063168678	1
wormd20150521s34NIC20VX0034rt16w03r03	2	NIC20.1493	NIC20	Taiwan	16	5/21/15	3	28.21790612	105	622.2	0.51662722	0.062854859	0.58752282	0.063168678	1
wormd20150521s34NIC20VX0034rt16w03r04	2	NIC20.1493	NIC20	Taiwan	16	5/21/15	4	29.27913061	254	600.672862	0.38690739	0.062854859	0.6922582	0.063168678	1
wormd20150521s34NIC20VX0034rt16w03r05	2	NIC20.1493	NIC20	Taiwan	16	5/21/15	5	30.3403551	293	661.223333	0.11680959	0.062854859	0.29338563	0.063168678	1
wormd20150521s34NIC20VX0034rt16w03r06	2	NIC20.1493	NIC20	Taiwan	16	5/21/15	6	31.40157959	293	666.15	0.06562648	0.062854859	0.07058451	0.063168678	0
wormd20150521s34NIC20VX0034rt16w03r07	2	NIC20.1493	NIC20	Taiwan	16	5/21/15	7	32.46280408	293	665.093333	0.06583147	0.062854859	0.06642466	0.063168678	0
wormd20150521s34NIC20VX0034rt16w03r08	2	NIC20.1493	NIC20	Taiwan	16	5/21/15	8	33.52402857	293	660.606667	0.06375193	0.062854859	0.06399201	0.063168678	0
wormd20150521s34NIC20VX0034rt16w03r09	2	NIC20.1493	NIC20	Taiwan	16	5/21/15	9	34.58525306	293	658.083333	0.0641621	0.062854859	0.06502332	0.063168678	0
wormd20150521s34NIC20VX0034rt16w03r10	2	NIC20.1493	NIC20	Taiwan	16	5/21/15	10	35.64647755	293	655.216667	0.06285486	0.062854859	0.06316868	0.063168678	0
wormd20150521s34NIC20VX0034rt16w03r11	2	NIC20.1493	NIC20	Taiwan	16	5/21/15	11	36.70770204	293	654.396667	0.06319194	0.062854859	0.06386492	0.063168678	0
wormd20150521s34NIC20VX0034rt16w03r12	2	NIC20.1493	NIC20	Taiwan	16	5/21/15	12	37.76892653	293	645.566667	0.06599793	0.062854859	0.06624323	0.063168678	0
wormd20150521s34NIC20VX0034rt16w03r13	2	NIC20.1493	NIC20	Taiwan	16	5/21/15	13	38.83015102	293	639.233333	0.06506384	0.062854859	0.06482221	0.063168678	0
wormd20150521s34NIC20VX0034rt16w03r14	2	NIC20.1493	NIC20	Taiwan	16	5/21/15	14	39.89137551	293	625.53	0.06830584	0.062854859	0.07040207	0.063168678	0
wormd20150521s34NIC20VX0034rt16w03r15	2	NIC20.1493	NIC20	Taiwan	16	5/21/15	15	40.9526	293	623.313333	0.06420806	0.062854859	0.06471598	0.063168678	0
wormd20150521s34NIC20VX0034rt16w07r00	6	NIC20.1494	NIC20	Taiwan	16	5/21/15	0	25.03423265	293	514.393333	0.20477567	0.065608228	0.66222658	0.066677104	1
wormd20150521s34NIC20VX0034rt16w07r01	6	NIC20.1494	NIC20	Taiwan	16	5/21/15	1	26.09545714	292	539.29097	0.2609285	0.065608228	0.73527219	0.066677104	1
wormd20150521s34NIC20VX0034rt16w07r02	6	NIC20.1494	NIC20	Taiwan	16	5/21/15	2	27.15668163	261	540.723881	0.25184008	0.065608228	0.73402092	0.066677104	1
wormd20150521s34NIC20VX0034rt16w07r03	6	NIC20.1494	NIC20	Taiwan	16	5/21/15	3	28.21790612	292	540.083612	0.15065606	0.065608228	0.54910684	0.066677104	1
wormd20150521s34NIC20VX0034rt16w07r04	6	NIC20.1494	NIC20	Taiwan	16	5/21/15	4	29.27913061	243	561.732	0.12713661	0.065608228	0.46143288	0.066677104	1
wormd20150521s34NIC20VX0034rt16w07r05	6	NIC20.1494	NIC20	Taiwan	16	5/21/15	5	30.3403551	274	503.245552	0.13605829	0.065608228	0.53121381	0.066677104	1
wormd20150521s34NIC20VX0034rt16w07r06	6	NIC20.1494	NIC20	Taiwan	16	5/21/15	6	31.40157959	290	540.884746	0.13383927	0.065608228	0.51949898	0.066677104	1
wormd20150521s34NIC20VX0034rt16w07r07	6	NIC20.1494	NIC20	Taiwan	16	5/21/15	7	32.46280408	293	518.156667	0.10992475	0.065608228	0.36214208	0.066677104	1
wormd20150521s34NIC20VX0034rt16w07r08	6	NIC20.1494	NIC20	Taiwan	16	5/21/15	8	33.52402857	293	452.66	0.08175817	0.065608228	0.08285955	0.066677104	0
wormd20150521s34NIC20VX0034rt16w07r09	6	NIC20.1494	NIC20	Taiwan	16	5/21/15	9	34.58525306	293	473.436667	0.08140836	0.065608228	0.08458424	0.066677104	0
wormd20150521s34NIC20VX0034rt16w07r10	6	NIC20.1494	NIC20	Taiwan	16	5/21/15	10	35.64647755	293	532.196667	0.09149472	0.065608228	0.09376868	0.066677104	0
wormd20150521s34NIC20VX0034rt16w07r11	6	NIC20.1494	NIC20	Taiwan	16	5/21/15	11	36.70770204	293	565.436667	0.07906617	0.065608228	0.07978343	0.066677104	0
wormd20150521s34NIC20VX0034rt16w07r12	6	NIC20.1494	NIC20	Taiwan	16	5/21/15	12	37.76892653	293	516.233333	0.06560823	0.065608228	0.0666771	0.066677104	0
wormd20150521s34NIC20VX0034rt16w07r13	6	NIC20.1494	NIC20	Taiwan	16	5/21/15	13	38.83015102	293	521.9	0.07151858	0.065608228	0.07165263	0.066677104	0
wormd20150521s34NIC20VX0034rt16w07r14	6	NIC20.1494	NIC20	Taiwan	16	5/21/15	14	39.89137551	293	460.8	0.07346365	0.065608228	0.07404613	0.066677104	0
wormd20150521s34NIC20VX0034rt16w07r15	6	NIC20.1494	NIC20	Taiwan	16	5/21/15	15	40.9526	293	474.586667	0.07471989	0.065608228	0.07508469	0.066677104	0
wormd20150521s34NIC20VX0034rt16w08r00	7	NIC20.1495	NIC20	Taiwan	16	5/21/15	0	25.03423265	293	390.983333	0.3248381	0.085309715	0.8074352	0.086462029	1
wormd20150521s34NIC20VX0034rt16w08r01	7	NIC20.1495	NIC20	Taiwan	16	5/21/15	1	26.09545714	293	388.486667	0.32267642	0.085309715	0.80076457	0.086462029	1
wormd20150521s34NIC20VX0034rt16w08r02	7	NIC20.1495	NIC20	Taiwan	16	5/21/15	2	27.15668163	185	346.794872	0.31882676	0.085309715	0.76310796	0.086462029	1
wormd20150521s34NIC20VX0034rt16w08r03	7	NIC20.1495	NIC20	Taiwan	16	5/21/15	3	28.21790612	162	347.739645	0.31913791	0.085309715	0.77179504	0.086462029	1
wormd20150521s34NIC20VX0034rt16w08r04	7	NIC20.1495	NIC20	Taiwan	16	5/21/15	4	29.27913061	293	417.593333	0.2340506	0.085309715	0.75840199	0.086462029	1
wormd20150521s34NIC20VX0034rt16w08r05	7	NIC20.1495	NIC20	Taiwan	16	5/21/15	5	30.3403551	289	396.75	0.22491216	0.085309715	0.76149803	0.086462029	1
wormd20150521s34NIC20VX0034rt16w08r06	7	NIC20.1495	NIC20	Taiwan	16	5/21/15	6	31.40157959	190	200.076923	0.1363232	0.085309715	0.38885031	0.086462029	1
wormd20150521s34NIC20VX0034rt16w08r07	7	NIC20.1495	NIC20	Taiwan	16	5/21/15	7	32.46280408	289	386.111486	0.1582107	0.085309715	0.66124558	0.086462029	1
wormd20150521s34NIC20VX0034rt16w08r08	7	NIC20.1495	NIC20	Taiwan	16	5/21/15	8	33.52402857	293	303.976667	0.10978288	0.085309715	0.24222397	0.086462029	1
wormd20150521s34NIC20VX0034rt16w08r09	7	NIC20.1495	NIC20	Taiwan	16	5/21/15	9	34.58525306	213	276.036364	0.12640931	0.085309715	0.13699866	0.086462029	0
wormd20150521s34NIC20VX0034rt16w08r10	7	NIC20.1495	NIC20	Taiwan	16	5/21/15	10	35.64647755	293	277.11	0.10440071	0.085309715	0.10486005	0.086462029	0
wormd20150521s34NIC20VX0034rt16w08r11	7	NIC20.1495	NIC20	Taiwan	16	5/21/15	11	36.70770204	293	273.4	0.09717152	0.085309715	0.09785568	0.086462029	0
wormd20150521s34NIC20VX0034rt16w08r12	7	NIC20.1495	NIC20	Taiwan	16	5/21/15	12	37.76892653	292	272.702341	0.09949811	0.085309715	0.10089997	0.086462029	0
wormd20150521s34NIC20VX0034rt16w08r13	7	NIC20.1495	NIC20	Taiwan	16	5/21/15	13	38.83015102	293	278.72	0.10833495	0.085309715	0.10852555	0.086462029	0
wormd20150521s34NIC20VX0034rt16w08r14	7	NIC20.1495	NIC20	Taiwan	16	5/21/15	14	39.89137551	293	293.53	0.10680368	0.085309715	0.10959746	0.086462029	0
wormd20150521s34NIC20VX0034rt16w08r15	7	NIC20.1495	NIC20	Taiwan	16	5/21/15	15	40.9526	293	356.02	0.08530971	0.085309715	0.08646203	0.086462029	0
wormd20150521s34NIC20VX0034rt16w09r00	8	NIC20.1496	NIC20	Taiwan	16	5/21/15	0	25.03423265	293	592.14	0.46055345	0.081227049	0.60342331	0.082149563	1
wormd20150521s34NIC20VX0034rt16w09r01	8	NIC20.1496	NIC20	Taiwan	16	5/21/15	1	26.09545714	293	591.013333	0.47588223	0.081227049	0.59438404	0.082149563	1
wormd20150521s34NIC20VX0034rt16w09r02	8	NIC20.1496	NIC20	Taiwan	16	5/21/15	2	27.15668163	278	575.60274	0.47903056	0.081227049	0.58163519	0.082149563	1
wormd20150521s34NIC20VX0034rt16w09r03	8	NIC20.1496	NIC20	Taiwan	16	5/21/15	3	28.21790612	134	571.086957	0.45137411	0.081227049	0.53112269	0.082149563	1
wormd20150521s34NIC20VX0034rt16w09r04	8	NIC20.1496	NIC20	Taiwan	16	5/21/15	4	29.27913061	101	550.035928	0.50029749	0.081227049	0.60586073	0.082149563	1
wormd20150521s34NIC20VX0034rt16w09r05	8	NIC20.1496	NIC20	Taiwan	16	5/21/15	5	30.3403551	222	567.898039	0.3888298	0.081227049	0.64140347	0.082149563	1
wormd20150521s34NIC20VX0034rt16w09r06	8	NIC20.1496	NIC20	Taiwan	16	5/21/15	6	31.40157959	281	577.489583	0.3602629	0.081227049	0.68240748	0.082149563	1
wormd20150521s34NIC20VX0034rt16w09r07	8	NIC20.1496	NIC20	Taiwan	16	5/21/15	7	32.46280408	146	568.958974	0.21453481	0.081227049	0.63455474	0.082149563	1
wormd20150521s34NIC20VX0034rt16w09r08	8	NIC20.1496	NIC20	Taiwan	16	5/21/15	8	33.52402857	282	568.730104	0.18700967	0.081227049	0.68011177	0.082149563	1
wormd20150521s34NIC20VX0034rt16w09r09	8	NIC20.1496	NIC20	Taiwan	16	5/21/15	9	34.58525306	278	476.883392	0.09594221	0.081227049	0.10873897	0.082149563	0
wormd20150521s34NIC20VX0034rt16w09r10	8	NIC20.1496	NIC20	Taiwan	16	5/21/15	10	35.64647755	278	482.610526	0.08917878	0.081227049	0.09295041	0.082149563	0
wormd20150521s34NIC20VX0034rt16w09r11	8	NIC20.1496	NIC20	Taiwan	16	5/21/15	11	36.70770204	269	504.300725	0.09038989	0.081227049	0.09870777	0.082149563	0
wormd20150521s34NIC20VX0034rt16w09r12	8	NIC20.1496	NIC20	Taiwan	16	5/21/15	12	37.76892653	284	513.931271	0.08697491	0.081227049	0.08996259	0.082149563	0
wormd20150521s34NIC20VX0034rt16w09r13	8	NIC20.1496	NIC20	Taiwan	16	5/21/15	13	38.83015102	265	511.140741	0.08387733	0.081227049	0.08462991	0.082149563	0
wormd20150521s34NIC20VX0034rt16w09r14	8	NIC20.1496	NIC20	Taiwan	16	5/21/15	14	39.89137551	283	506.210345	0.09089512	0.081227049	0.0941687	0.082149563	0
wormd20150521s34NIC20VX0034rt16w09r15	8	NIC20.1496	NIC20	Taiwan	16	5/21/15	15	40.9526	260	526.35206	0.08122705	0.081227049	0.08214956	0.082149563	0
wormd20150521s34NIC20VX0034rt16w13r00	12	NIC20.1497	NIC20	Taiwan	16	5/21/15	0	25.03423265	258	624.445993	0.31914825	0.065019785	0.69292385	0.063933461	1
wormd20150521s34NIC20VX0034rt16w13r01	12	NIC20.1497	NIC20	Taiwan	16	5/21/15	1	26.09545714	265	640.120275	0.29786779	0.065019785	0.65088382	0.063933461	1
wormd20150521s34NIC20VX0034rt16w13r02	12	NIC20.1497	NIC20	Taiwan	16	5/21/15	2	27.15668163	279	573.440141	0.40242829	0.065019785	0.64597514	0.063933461	1
wormd20150521s34NIC20VX0034rt16w13r03	12	NIC20.1497	NIC20	Taiwan	16	5/21/15	3	28.21790612	164	612.351064	0.39578571	0.065019785	0.6544775	0.063933461	1
wormd20150521s34NIC20VX0034rt16w13r04	12	NIC20.1497	NIC20	Taiwan	16	5/21/15	4	29.27913061	145	527.3125	0.42811689	0.065019785	0.6439713	0.063933461	1
wormd20150521s34NIC20VX0034rt16w13r05	12	NIC20.1497	NIC20	Taiwan	16	5/21/15	5	30.3403551	211	542.186992	0.4065564	0.065019785	0.73509104	0.063933461	1
wormd20150521s34NIC20VX0034rt16w13r06	12	NIC20.1497	NIC20	Taiwan	16	5/21/15	6	31.40157959	293	606.156667	0.23111449	0.065019785	0.71612882	0.063933461	1
wormd20150521s34NIC20VX0034rt16w13r08	12	NIC20.1497	NIC20	Taiwan	16	5/21/15	8	33.52402857	268	631.136519	0.14597956	0.065019785	0.55609004	0.063933461	1
wormd20150521s34NIC20VX0034rt16w13r09	12	NIC20.1497	NIC20	Taiwan	16	5/21/15	9	34.58525306	237	480.717213	0.09568547	0.065019785	0.09671688	0.063933461	0
wormd20150521s34NIC20VX0034rt16w13r11	12	NIC20.1497	NIC20	Taiwan	16	5/21/15	11	36.70770204	125	149.161538	0.06501978	0.065019785	0.06393346	0.063933461	0
wormd20150521s34NIC20VX0034rt16w13r13	12	NIC20.1497	NIC20	Taiwan	16	5/21/15	13	38.83015102	272	476.722034	0.09096192	0.065019785	0.0900481	0.063933461	0
wormd20150521s34NIC20VX0034rt16w13r14	12	NIC20.1497	NIC20	Taiwan	16	5/21/15	14	39.89137551	293	574.816667	0.11401406	0.065019785	0.11620857	0.063933461	0
wormd20150521s34NIC20VX0034rt16w13r15	12	NIC20.1497	NIC20	Taiwan	16	5/21/15	15	40.9526	293	575.806667	0.10523993	0.065019785	0.10832411	0.063933461	0
wormd20150521s34NIC20VX0034rt16w14r00	13	NIC20.1498	NIC20	Taiwan	16	5/21/15	0	25.03423265	293	550.066667	0.31018415	0.069130532	0.65190255	0.069085661	1
wormd20150521s34NIC20VX0034rt16w14r01	13	NIC20.1498	NIC20	Taiwan	16	5/21/15	1	26.09545714	293	560.493333	0.27217248	0.069130532	0.66216138	0.069085661	1
wormd20150521s34NIC20VX0034rt16w14r02	13	NIC20.1498	NIC20	Taiwan	16	5/21/15	2	27.15668163	293	582.066667	0.290718	0.069130532	0.60456411	0.069085661	1
wormd20150521s34NIC20VX0034rt16w14r03	13	NIC20.1498	NIC20	Taiwan	16	5/21/15	3	28.21790612	273	502.766551	0.34461005	0.069130532	0.71775752	0.069085661	1
wormd20150521s34NIC20VX0034rt16w14r04	13	NIC20.1498	NIC20	Taiwan	16	5/21/15	4	29.27913061	207	513.987179	0.27292835	0.069130532	0.69153316	0.069085661	1
wormd20150521s34NIC20VX0034rt16w14r05	13	NIC20.1498	NIC20	Taiwan	16	5/21/15	5	30.3403551	204	482.175214	0.32859723	0.069130532	0.68477268	0.069085661	1
wormd20150521s34NIC20VX0034rt16w14r06	13	NIC20.1498	NIC20	Taiwan	16	5/21/15	6	31.40157959	293	553.873333	0.16139031	0.069130532	0.59358935	0.069085661	1
wormd20150521s34NIC20VX0034rt16w14r07	13	NIC20.1498	NIC20	Taiwan	16	5/21/15	7	32.46280408	216	509.064516	0.14797809	0.069130532	0.52869426	0.069085661	1
wormd20150521s34NIC20VX0034rt16w14r08	13	NIC20.1498	NIC20	Taiwan	16	5/21/15	8	33.52402857	293	451.74	0.06941009	0.069130532	0.06922222	0.069085661	0
wormd20150521s34NIC20VX0034rt16w14r09	13	NIC20.1498	NIC20	Taiwan	16	5/21/15	9	34.58525306	293	451.836667	0.07135896	0.069130532	0.07642696	0.069085661	0
wormd20150521s34NIC20VX0034rt16w14r10	13	NIC20.1498	NIC20	Taiwan	16	5/21/15	10	35.64647755	293	449.8	0.06915256	0.069130532	0.06920988	0.069085661	0
wormd20150521s34NIC20VX0034rt16w14r11	13	NIC20.1498	NIC20	Taiwan	16	5/21/15	11	36.70770204	293	448.99	0.06913053	0.069130532	0.06908566	0.069085661	0
wormd20150521s34NIC20VX0034rt16w14r12	13	NIC20.1498	NIC20	Taiwan	16	5/21/15	12	37.76892653	293	453.13	0.07083344	0.069130532	0.07110996	0.069085661	0
wormd20150521s34NIC20VX0034rt16w14r13	13	NIC20.1498	NIC20	Taiwan	16	5/21/15	13	38.83015102	293	454.19	0.07021402	0.069130532	0.07069878	0.069085661	0
wormd20150521s34NIC20VX0034rt16w14r14	13	NIC20.1498	NIC20	Taiwan	16	5/21/15	14	39.89137551	293	449.623333	0.07516324	0.069130532	0.07487673	0.069085661	0
wormd20150521s34NIC20VX0034rt16w14r15	13	NIC20.1498	NIC20	Taiwan	16	5/21/15	15	40.9526	293	454.733333	0.07682681	0.069130532	0.07640511	0.069085661	0
wormd20150521s34NIC20VX0034rt16w15r00	14	NIC20.1499	NIC20	Taiwan	16	5/21/15	0	25.03423265	290	596.680135	0.37377645	0.078261815	0.7602535	0.078877221	1
wormd20150521s34NIC20VX0034rt16w15r01	14	NIC20.1499	NIC20	Taiwan	16	5/21/15	1	26.09545714	218	663.552419	0.37003839	0.078261815	0.78239555	0.078877221	1
wormd20150521s34NIC20VX0034rt16w15r02	14	NIC20.1499	NIC20	Taiwan	16	5/21/15	2	27.15668163	273	677.196429	0.21398975	0.078261815	0.61711631	0.078877221	1
wormd20150521s34NIC20VX0034rt16w15r03	14	NIC20.1499	NIC20	Taiwan	16	5/21/15	3	28.21790612	121	631.791139	0.2496139	0.078261815	0.68364753	0.078877221	1
wormd20150521s34NIC20VX0034rt16w15r04	14	NIC20.1499	NIC20	Taiwan	16	5/21/15	4	29.27913061	277	649.546392	0.24734567	0.078261815	0.70710409	0.078877221	1
wormd20150521s34NIC20VX0034rt16w15r05	14	NIC20.1499	NIC20	Taiwan	16	5/21/15	5	30.3403551	293	599.77	0.13691176	0.078261815	0.41344784	0.078877221	1
wormd20150521s34NIC20VX0034rt16w15r06	14	NIC20.1499	NIC20	Taiwan	16	5/21/15	6	31.40157959	293	535.803333	0.07826182	0.078261815	0.07887722	0.078877221	0
wormd20150521s34NIC20VX0034rt16w15r07	14	NIC20.1499	NIC20	Taiwan	16	5/21/15	7	32.46280408	293	574.803333	0.08426707	0.078261815	0.08734207	0.078877221	0
wormd20150521s34NIC20VX0034rt16w15r08	14	NIC20.1499	NIC20	Taiwan	16	5/21/15	8	33.52402857	293	521.743333	0.09490879	0.078261815	0.09481225	0.078877221	0
wormd20150521s34NIC20VX0034rt16w15r09	14	NIC20.1499	NIC20	Taiwan	16	5/21/15	9	34.58525306	293	517.303333	0.09575521	0.078261815	0.09775905	0.078877221	0
wormd20150521s34NIC20VX0034rt16w15r10	14	NIC20.1499	NIC20	Taiwan	16	5/21/15	10	35.64647755	292	516.966555	0.09968358	0.078261815	0.09762449	0.078877221	0
wormd20150521s34NIC20VX0034rt16w15r11	14	NIC20.1499	NIC20	Taiwan	16	5/21/15	11	36.70770204	293	529.516667	0.09918551	0.078261815	0.10098615	0.078877221	0
wormd20150521s34NIC20VX0034rt16w15r12	14	NIC20.1499	NIC20	Taiwan	16	5/21/15	12	37.76892653	292	548.772575	0.1010989	0.078261815	0.09930569	0.078877221	0
wormd20150521s34NIC20VX0034rt16w15r13	14	NIC20.1499	NIC20	Taiwan	16	5/21/15	13	38.83015102	289	554.050676	0.10340569	0.078261815	0.10671679	0.078877221	0
wormd20150521s34NIC20VX0034rt16w15r14	14	NIC20.1499	NIC20	Taiwan	16	5/21/15	14	39.89137551	207	673.307143	0.13809956	0.078261815	0.14070333	0.078877221	1
wormd20150521s34NIC20VX0034rt16w15r15	14	NIC20.1499	NIC20	Taiwan	16	5/21/15	15	40.9526	282	674.831081	0.09295401	0.078261815	0.09247619	0.078877221	0
wormd20150522s113ED3101NIC20rt16w04r00	3	NIC20.1500	NIC20	Taiwan	16	5/22/15	0	25.03423265	291	489.842282	0.51779429	0.039691344	0.61090303	0.063193838	1
wormd20150522s113ED3101NIC20rt16w04r01	3	NIC20.1500	NIC20	Taiwan	16	5/22/15	1	26.09545714	219	539.800885	0.48074992	0.039691344	0.59285065	0.063193838	1
wormd20150522s113ED3101NIC20rt16w04r02	3	NIC20.1500	NIC20	Taiwan	16	5/22/15	2	27.15668163	287	497.091837	0.57738999	0.039691344	0.64691938	0.063193838	1
wormd20150522s113ED3101NIC20rt16w04r03	3	NIC20.1500	NIC20	Taiwan	16	5/22/15	3	28.21790612	179	381.516304	0.36030683	0.039691344	0.48071152	0.063193838	1
wormd20150522s113ED3101NIC20rt16w04r04	3	NIC20.1500	NIC20	Taiwan	16	5/22/15	4	29.27913061	221	409.124444	0.35252069	0.039691344	0.49236546	0.063193838	1
wormd20150522s113ED3101NIC20rt16w04r05	3	NIC20.1500	NIC20	Taiwan	16	5/22/15	5	30.3403551	204	419.78673	0.35000236	0.039691344	0.53441214	0.063193838	1
wormd20150522s113ED3101NIC20rt16w04r06	3	NIC20.1500	NIC20	Taiwan	16	5/22/15	6	31.40157959	239	418.280488	0.33389157	0.039691344	0.55121342	0.063193838	1
wormd20150522s113ED3101NIC20rt16w04r07	3	NIC20.1500	NIC20	Taiwan	16	5/22/15	7	32.46280408	179	191.486486	0.03969134	0.039691344	0.06319384	0.063193838	0
wormd20150522s113ED3101NIC20rt16w04r08	3	NIC20.1500	NIC20	Taiwan	16	5/22/15	8	33.52402857	293	479.433333	0.29236691	0.039691344	0.73189631	0.063193838	1
wormd20150522s113ED3101NIC20rt16w04r09	3	NIC20.1500	NIC20	Taiwan	16	5/22/15	9	34.58525306	293	492.836667	0.08336871	0.039691344	0.09884138	0.063193838	0
wormd20150522s113ED3101NIC20rt16w04r10	3	NIC20.1500	NIC20	Taiwan	16	5/22/15	10	35.64647755	293	487.256667	0.08132201	0.039691344	0.09083089	0.063193838	0
wormd20150522s113ED3101NIC20rt16w04r11	3	NIC20.1500	NIC20	Taiwan	16	5/22/15	11	36.70770204	293	462.336667	0.08418735	0.039691344	0.08612975	0.063193838	0
wormd20150522s113ED3101NIC20rt16w04r12	3	NIC20.1500	NIC20	Taiwan	16	5/22/15	12	37.76892653	293	470.146667	0.08190326	0.039691344	0.0863567	0.063193838	0
wormd20150522s113ED3101NIC20rt16w04r13	3	NIC20.1500	NIC20	Taiwan	16	5/22/15	13	38.83015102	293	451.946667	0.07912428	0.039691344	0.08010454	0.063193838	0
wormd20150522s113ED3101NIC20rt16w04r14	3	NIC20.1500	NIC20	Taiwan	16	5/22/15	14	39.89137551	293	447.006667	0.08041843	0.039691344	0.08055407	0.063193838	0
wormd20150522s113ED3101NIC20rt16w04r15	3	NIC20.1500	NIC20	Taiwan	16	5/22/15	15	40.9526	293	447.793333	0.08514454	0.039691344	0.08442629	0.063193838	0
wormd20150522s113ED3101NIC20rt16w05r00	4	NIC20.1501	NIC20	Taiwan	16	5/22/15	0	25.03423265	223	737.487273	0.30451256	0.074775854	0.70108422	0.075297224	1
wormd20150522s113ED3101NIC20rt16w05r01	4	NIC20.1501	NIC20	Taiwan	16	5/22/15	1	26.09545714	104	668.510949	0.32752661	0.074775854	0.68789283	0.075297224	1
wormd20150522s113ED3101NIC20rt16w05r04	4	NIC20.1501	NIC20	Taiwan	16	5/22/15	4	29.27913061	134	748.877451	0.27046044	0.074775854	0.72954428	0.075297224	1
wormd20150522s113ED3101NIC20rt16w05r09	4	NIC20.1501	NIC20	Taiwan	16	5/22/15	9	34.58525306	214	689.394495	0.07763739	0.074775854	0.07978021	0.075297224	0
wormd20150522s113ED3101NIC20rt16w05r10	4	NIC20.1501	NIC20	Taiwan	16	5/22/15	10	35.64647755	237	695.03719	0.07794829	0.074775854	0.07796255	0.075297224	0
wormd20150522s113ED3101NIC20rt16w05r11	4	NIC20.1501	NIC20	Taiwan	16	5/22/15	11	36.70770204	245	685.900794	0.07477585	0.074775854	0.07529722	0.075297224	0
wormd20150522s113ED3101NIC20rt16w05r12	4	NIC20.1501	NIC20	Taiwan	16	5/22/15	12	37.76892653	159	682.355828	0.07671182	0.074775854	0.07639131	0.075297224	0
wormd20150522s113ED3101NIC20rt16w05r13	4	NIC20.1501	NIC20	Taiwan	16	5/22/15	13	38.83015102	141	670.340136	0.07764338	0.074775854	0.08179445	0.075297224	0
wormd20150522s113ED3101NIC20rt16w05r14	4	NIC20.1501	NIC20	Taiwan	16	5/22/15	14	39.89137551	156	639.930818	0.08186942	0.074775854	0.08238902	0.075297224	0
wormd20150522s113ED3101NIC20rt16w05r15	4	NIC20.1501	NIC20	Taiwan	16	5/22/15	15	40.9526	147	606.565789	0.07806703	0.074775854	0.08121046	0.075297224	0
wormd20150522s113ED3101NIC20rt16w06r00	5	NIC20.1502	NIC20	Taiwan	16	5/22/15	0	25.03423265	199	714.684982	0.37568914	0.107014137	0.67621002	0.107755829	1
wormd20150522s113ED3101NIC20rt16w06r01	5	NIC20.1502	NIC20	Taiwan	16	5/22/15	1	26.09545714	136	705.990698	0.38130877	0.107014137	0.6962279	0.107755829	1
wormd20150522s113ED3101NIC20rt16w06r02	5	NIC20.1502	NIC20	Taiwan	16	5/22/15	2	27.15668163	147	739.672	0.37641996	0.107014137	0.69171175	0.107755829	1
wormd20150522s113ED3101NIC20rt16w06r04	5	NIC20.1502	NIC20	Taiwan	16	5/22/15	4	29.27913061	156	714.124444	0.30800558	0.107014137	0.68526324	0.107755829	1
wormd20150522s113ED3101NIC20rt16w06r08	5	NIC20.1502	NIC20	Taiwan	16	5/22/15	8	33.52402857	120	249.692708	0.12538691	0.107014137	0.14135669	0.107755829	1
wormd20150522s113ED3101NIC20rt16w06r09	5	NIC20.1502	NIC20	Taiwan	16	5/22/15	9	34.58525306	245	259.488636	0.11688042	0.107014137	0.11830903	0.107755829	0
wormd20150522s113ED3101NIC20rt16w06r10	5	NIC20.1502	NIC20	Taiwan	16	5/22/15	10	35.64647755	289	276.608844	0.11496948	0.107014137	0.11574829	0.107755829	0
wormd20150522s113ED3101NIC20rt16w06r11	5	NIC20.1502	NIC20	Taiwan	16	5/22/15	11	36.70770204	293	295.286667	0.11901524	0.107014137	0.12094256	0.107755829	0
wormd20150522s113ED3101NIC20rt16w06r12	5	NIC20.1502	NIC20	Taiwan	16	5/22/15	12	37.76892653	293	309.476667	0.11243076	0.107014137	0.11566878	0.107755829	0
wormd20150522s113ED3101NIC20rt16w06r13	5	NIC20.1502	NIC20	Taiwan	16	5/22/15	13	38.83015102	293	325.323333	0.11110325	0.107014137	0.11102647	0.107755829	0
wormd20150522s113ED3101NIC20rt16w06r14	5	NIC20.1502	NIC20	Taiwan	16	5/22/15	14	39.89137551	293	342.8	0.10701414	0.107014137	0.10775583	0.107755829	0
wormd20150522s113ED3101NIC20rt16w06r15	5	NIC20.1502	NIC20	Taiwan	16	5/22/15	15	40.9526	293	354.45	0.10974173	0.107014137	0.11222476	0.107755829	0
wormd20150522s113ED3101NIC20rt16w12r00	11	NIC20.1505	NIC20	Taiwan	16	5/22/15	0	25.03423265	282	605.942568	0.35774604	0.106772213	0.72331725	0.107381726	1
wormd20150522s113ED3101NIC20rt16w12r01	11	NIC20.1505	NIC20	Taiwan	16	5/22/15	1	26.09545714	284	564.215488	0.35166039	0.106772213	0.69293606	0.107381726	1
wormd20150522s113ED3101NIC20rt16w12r02	11	NIC20.1505	NIC20	Taiwan	16	5/22/15	2	27.15668163	213	590.58952	0.38509937	0.106772213	0.73529512	0.107381726	1
wormd20150522s113ED3101NIC20rt16w12r03	11	NIC20.1505	NIC20	Taiwan	16	5/22/15	3	28.21790612	284	548.38488	0.35540502	0.106772213	0.75384818	0.107381726	1
wormd20150522s113ED3101NIC20rt16w12r04	11	NIC20.1505	NIC20	Taiwan	16	5/22/15	4	29.27913061	114	467.314961	0.30816256	0.106772213	0.70267189	0.107381726	1
wormd20150522s113ED3101NIC20rt16w12r05	11	NIC20.1505	NIC20	Taiwan	16	5/22/15	5	30.3403551	266	627.311355	0.20992909	0.106772213	0.71425702	0.107381726	1
wormd20150522s113ED3101NIC20rt16w12r06	11	NIC20.1505	NIC20	Taiwan	16	5/22/15	6	31.40157959	258	605.415094	0.1374395	0.106772213	0.41530175	0.107381726	1
wormd20150522s113ED3101NIC20rt16w12r07	11	NIC20.1505	NIC20	Taiwan	16	5/22/15	7	32.46280408	276	666.908127	0.10764461	0.106772213	0.13318937	0.107381726	0
wormd20150522s113ED3101NIC20rt16w12r08	11	NIC20.1505	NIC20	Taiwan	16	5/22/15	8	33.52402857	287	638.537415	0.10749338	0.106772213	0.11554604	0.107381726	0
wormd20150522s113ED3101NIC20rt16w12r09	11	NIC20.1505	NIC20	Taiwan	16	5/22/15	9	34.58525306	293	634.086667	0.10677221	0.106772213	0.10824097	0.107381726	0
wormd20150522s113ED3101NIC20rt16w12r10	11	NIC20.1505	NIC20	Taiwan	16	5/22/15	10	35.64647755	293	622.6	0.10728595	0.106772213	0.10738173	0.107381726	0
wormd20150522s113ED3101NIC20rt16w12r11	11	NIC20.1505	NIC20	Taiwan	16	5/22/15	11	36.70770204	293	575.483333	0.11745931	0.106772213	0.11932175	0.107381726	0
wormd20150522s113ED3101NIC20rt16w12r12	11	NIC20.1505	NIC20	Taiwan	16	5/22/15	12	37.76892653	293	536.73	0.1132879	0.106772213	0.11361037	0.107381726	0
wormd20150522s113ED3101NIC20rt16w12r13	11	NIC20.1505	NIC20	Taiwan	16	5/22/15	13	38.83015102	293	549.526667	0.1209213	0.106772213	0.12102648	0.107381726	0
wormd20150522s113ED3101NIC20rt16w12r14	11	NIC20.1505	NIC20	Taiwan	16	5/22/15	14	39.89137551	293	569.313333	0.11939009	0.106772213	0.11879264	0.107381726	0
wormd20150522s113ED3101NIC20rt16w12r15	11	NIC20.1505	NIC20	Taiwan	16	5/22/15	15	40.9526	293	572.503333	0.12525542	0.106772213	0.12642564	0.107381726	0
wormd20150522s113ED3101NIC20rt16w15r00	15	NIC20.1506	NIC20	Taiwan	16	5/22/15	0	25.03423265	204	724.466926	0.35522163	0.069321753	0.64705468	0.070062354	1
wormd20150522s113ED3101NIC20rt16w15r01	15	NIC20.1506	NIC20	Taiwan	16	5/22/15	1	26.09545714	170	717.122271	0.35685261	0.069321753	0.68334024	0.070062354	1
wormd20150522s113ED3101NIC20rt16w15r03	15	NIC20.1506	NIC20	Taiwan	16	5/22/15	3	28.21790612	132	742.224215	0.29022402	0.069321753	0.71906224	0.070062354	1
wormd20150522s113ED3101NIC20rt16w15r04	15	NIC20.1506	NIC20	Taiwan	16	5/22/15	4	29.27913061	126	718.256637	0.28353934	0.069321753	0.72038322	0.070062354	1
wormd20150522s113ED3101NIC20rt16w15r05	15	NIC20.1506	NIC20	Taiwan	16	5/22/15	5	30.3403551	190	760.096386	0.27426519	0.069321753	0.64931765	0.070062354	1
wormd20150522s113ED3101NIC20rt16w15r06	15	NIC20.1506	NIC20	Taiwan	16	5/22/15	6	31.40157959	176	753.110236	0.20666306	0.069321753	0.62620595	0.070062354	1
wormd20150522s113ED3101NIC20rt16w15r08	15	NIC20.1506	NIC20	Taiwan	16	5/22/15	8	33.52402857	251	730.514706	0.13530557	0.069321753	0.50924184	0.070062354	1
wormd20150522s113ED3101NIC20rt16w15r11	15	NIC20.1506	NIC20	Taiwan	16	5/22/15	11	36.70770204	200	786.704225	0.07349925	0.069321753	0.07383426	0.070062354	0
wormd20150522s113ED3101NIC20rt16w15r12	15	NIC20.1506	NIC20	Taiwan	16	5/22/15	12	37.76892653	269	777.983165	0.07158558	0.069321753	0.07206043	0.070062354	0
wormd20150522s113ED3101NIC20rt16w15r13	15	NIC20.1506	NIC20	Taiwan	16	5/22/15	13	38.83015102	293	770.58	0.07077688	0.069321753	0.07132686	0.070062354	0
wormd20150522s113ED3101NIC20rt16w15r14	15	NIC20.1506	NIC20	Taiwan	16	5/22/15	14	39.89137551	293	756.013333	0.07209872	0.069321753	0.07225864	0.070062354	0
wormd20150522s113ED3101NIC20rt16w15r15	15	NIC20.1506	NIC20	Taiwan	16	5/22/15	15	40.9526	293	749.966667	0.06932175	0.069321753	0.07006235	0.070062354	0
wormd20150522s113ED3101NIC20rt16w16r00	16	NIC20.1507	NIC20	Taiwan	16	5/22/15	0	25.03423265	293	654.53	0.24971596	0.072865139	0.6956574	0.072642717	1
wormd20150522s113ED3101NIC20rt16w16r01	16	NIC20.1507	NIC20	Taiwan	16	5/22/15	1	26.09545714	285	675.26087	0.33947272	0.072865139	0.7431146	0.072642717	1
wormd20150522s113ED3101NIC20rt16w16r02	16	NIC20.1507	NIC20	Taiwan	16	5/22/15	2	27.15668163	156	758.724806	0.28289768	0.072865139	0.76657869	0.072642717	1
wormd20150522s113ED3101NIC20rt16w16r03	16	NIC20.1507	NIC20	Taiwan	16	5/22/15	3	28.21790612	193	709.63806	0.29792987	0.072865139	0.78757162	0.072642717	1
wormd20150522s113ED3101NIC20rt16w16r04	16	NIC20.1507	NIC20	Taiwan	16	5/22/15	4	29.27913061	147	747.903061	0.20718093	0.072865139	0.66385242	0.072642717	1
wormd20150522s113ED3101NIC20rt16w16r05	16	NIC20.1507	NIC20	Taiwan	16	5/22/15	5	30.3403551	184	682.901961	0.21446283	0.072865139	0.70262315	0.072642717	1
wormd20150522s113ED3101NIC20rt16w16r06	16	NIC20.1507	NIC20	Taiwan	16	5/22/15	6	31.40157959	274	700.391892	0.16493526	0.072865139	0.60088599	0.072642717	1
wormd20150522s113ED3101NIC20rt16w16r07	16	NIC20.1507	NIC20	Taiwan	16	5/22/15	7	32.46280408	265	725.085616	0.10216	0.072865139	0.33265558	0.072642717	1
wormd20150522s113ED3101NIC20rt16w16r09	16	NIC20.1507	NIC20	Taiwan	16	5/22/15	9	34.58525306	226	695.965217	0.08199598	0.072865139	0.08338965	0.072642717	0
wormd20150522s113ED3101NIC20rt16w16r11	16	NIC20.1507	NIC20	Taiwan	16	5/22/15	11	36.70770204	207	662.367925	0.07389292	0.072865139	0.07397489	0.072642717	0
wormd20150522s113ED3101NIC20rt16w16r12	16	NIC20.1507	NIC20	Taiwan	16	5/22/15	12	37.76892653	290	641.787879	0.07410251	0.072865139	0.07457198	0.072642717	0
wormd20150522s113ED3101NIC20rt16w16r13	16	NIC20.1507	NIC20	Taiwan	16	5/22/15	13	38.83015102	293	665.07	0.0758267	0.072865139	0.07603661	0.072642717	0
wormd20150522s113ED3101NIC20rt16w16r14	16	NIC20.1507	NIC20	Taiwan	16	5/22/15	14	39.89137551	293	657.283333	0.07529816	0.072865139	0.07527248	0.072642717	0
wormd20150522s113ED3101NIC20rt16w16r15	16	NIC20.1507	NIC20	Taiwan	16	5/22/15	15	40.9526	249	639.494881	0.07286514	0.072865139	0.07264272	0.072642717	0
wormd20150522s113ED3101NIC20rt16w17r00	17	NIC20.1508	NIC20	Taiwan	16	5/22/15	0	25.03423265	228	716.592857	0.31484217	0.073468133	0.70017818	0.073566462	1
wormd20150522s113ED3101NIC20rt16w17r01	17	NIC20.1508	NIC20	Taiwan	16	5/22/15	1	26.09545714	293	614.52	0.42631482	0.073468133	0.67478589	0.073566462	1
wormd20150522s113ED3101NIC20rt16w17r03	17	NIC20.1508	NIC20	Taiwan	16	5/22/15	3	28.21790612	158	700.286996	0.37191992	0.073468133	0.69912934	0.073566462	1
wormd20150522s113ED3101NIC20rt16w17r04	17	NIC20.1508	NIC20	Taiwan	16	5/22/15	4	29.27913061	167	734.654618	0.23457207	0.073468133	0.70151404	0.073566462	1
wormd20150522s113ED3101NIC20rt16w17r05	17	NIC20.1508	NIC20	Taiwan	16	5/22/15	5	30.3403551	202	708.961832	0.20602195	0.073468133	0.6879231	0.073566462	1
wormd20150522s113ED3101NIC20rt16w17r06	17	NIC20.1508	NIC20	Taiwan	16	5/22/15	6	31.40157959	293	600.71	0.24732436	0.073468133	0.74398351	0.073566462	1
wormd20150522s113ED3101NIC20rt16w17r07	17	NIC20.1508	NIC20	Taiwan	16	5/22/15	7	32.46280408	240	616.685039	0.1911529	0.073468133	0.64059912	0.073566462	1
wormd20150522s113ED3101NIC20rt16w17r08	17	NIC20.1508	NIC20	Taiwan	16	5/22/15	8	33.52402857	212	545.86758	0.08760764	0.073468133	0.28524466	0.073566462	1
wormd20150522s113ED3101NIC20rt16w17r09	17	NIC20.1508	NIC20	Taiwan	16	5/22/15	9	34.58525306	293	680.98	0.07829327	0.073468133	0.08370675	0.073566462	0
wormd20150522s113ED3101NIC20rt16w17r10	17	NIC20.1508	NIC20	Taiwan	16	5/22/15	10	35.64647755	293	662.093333	0.07818767	0.073468133	0.08530907	0.073566462	0
wormd20150522s113ED3101NIC20rt16w17r11	17	NIC20.1508	NIC20	Taiwan	16	5/22/15	11	36.70770204	293	643.146667	0.08328343	0.073468133	0.08268241	0.073566462	0
wormd20150522s113ED3101NIC20rt16w17r12	17	NIC20.1508	NIC20	Taiwan	16	5/22/15	12	37.76892653	293	627.956667	0.08213335	0.073468133	0.08246373	0.073566462	0
wormd20150522s113ED3101NIC20rt16w17r13	17	NIC20.1508	NIC20	Taiwan	16	5/22/15	13	38.83015102	293	663.263333	0.07346813	0.073468133	0.07356646	0.073566462	0
wormd20150522s113ED3101NIC20rt16w17r14	17	NIC20.1508	NIC20	Taiwan	16	5/22/15	14	39.89137551	293	623.68	0.08049724	0.073468133	0.08086457	0.073566462	0
wormd20150522s113ED3101NIC20rt16w17r15	17	NIC20.1508	NIC20	Taiwan	16	5/22/15	15	40.9526	293	568.066667	0.08560242	0.073468133	0.08657588	0.073566462	0
wormd20150524s33NIC20GXW0023rt16w01r00	0	NIC20.1527	NIC20	Taiwan	16	5/24/15	0	25.03423265	287	461.346939	0.5010048	0.096229617	0.76565809	0.104433525	1
wormd20150524s33NIC20GXW0023rt16w01r01	0	NIC20.1527	NIC20	Taiwan	16	5/24/15	1	26.09545714	249	479.23506	0.55867046	0.096229617	0.72058834	0.104433525	1
wormd20150524s33NIC20GXW0023rt16w01r02	0	NIC20.1527	NIC20	Taiwan	16	5/24/15	2	27.15668163	262	440.985075	0.5420419	0.096229617	0.73077444	0.104433525	1
wormd20150524s33NIC20GXW0023rt16w01r03	0	NIC20.1527	NIC20	Taiwan	16	5/24/15	3	28.21790612	159	495.090909	0.49023554	0.096229617	0.67877589	0.104433525	1
wormd20150524s33NIC20GXW0023rt16w01r04	0	NIC20.1527	NIC20	Taiwan	16	5/24/15	4	29.27913061	232	412.456067	0.53770825	0.096229617	0.79796972	0.104433525	1
wormd20150524s33NIC20GXW0023rt16w01r05	0	NIC20.1527	NIC20	Taiwan	16	5/24/15	5	30.3403551	210	423.709677	0.38516155	0.096229617	0.79373981	0.104433525	1
wormd20150524s33NIC20GXW0023rt16w01r06	0	NIC20.1527	NIC20	Taiwan	16	5/24/15	6	31.40157959	155	384.5125	0.35713791	0.096229617	0.80173339	0.104433525	1
wormd20150524s33NIC20GXW0023rt16w01r07	0	NIC20.1527	NIC20	Taiwan	16	5/24/15	7	32.46280408	249	410.863281	0.14237898	0.096229617	0.42889206	0.104433525	1
wormd20150524s33NIC20GXW0023rt16w01r08	0	NIC20.1527	NIC20	Taiwan	16	5/24/15	8	33.52402857	185	482.401042	0.0975898	0.096229617	0.12354325	0.104433525	0
wormd20150524s33NIC20GXW0023rt16w01r09	0	NIC20.1527	NIC20	Taiwan	16	5/24/15	9	34.58525306	214	474.669683	0.09622962	0.096229617	0.10613439	0.104433525	0
wormd20150524s33NIC20GXW0023rt16w01r10	0	NIC20.1527	NIC20	Taiwan	16	5/24/15	10	35.64647755	271	494.637681	0.10226254	0.096229617	0.10443353	0.104433525	0
wormd20150524s33NIC20GXW0023rt16w01r11	0	NIC20.1527	NIC20	Taiwan	16	5/24/15	11	36.70770204	247	473.598425	0.10808349	0.096229617	0.10890903	0.104433525	0
wormd20150524s33NIC20GXW0023rt16w01r12	0	NIC20.1527	NIC20	Taiwan	16	5/24/15	12	37.76892653	144	440.754967	0.11214924	0.096229617	0.11238801	0.104433525	0
wormd20150524s33NIC20GXW0023rt16w01r13	0	NIC20.1527	NIC20	Taiwan	16	5/24/15	13	38.83015102	289	460.911565	0.11355321	0.096229617	0.11207247	0.104433525	0
wormd20150524s33NIC20GXW0023rt16w01r14	0	NIC20.1527	NIC20	Taiwan	16	5/24/15	14	39.89137551	293	453.73	0.10782043	0.096229617	0.10721699	0.104433525	0
wormd20150524s33NIC20GXW0023rt16w01r15	0	NIC20.1527	NIC20	Taiwan	16	5/24/15	15	40.9526	293	474.72	0.11108653	0.096229617	0.11335304	0.104433525	0
wormd20150524s33NIC20GXW0023rt16w02r00	1	NIC20.1528	NIC20	Taiwan	16	5/24/15	0	25.03423265	293	530.403333	0.37750916	0.082049717	0.77524388	0.084143247	1
wormd20150524s33NIC20GXW0023rt16w02r02	1	NIC20.1528	NIC20	Taiwan	16	5/24/15	2	27.15668163	128	468.338462	0.32739054	0.082049717	0.74000919	0.084143247	1
wormd20150524s33NIC20GXW0023rt16w02r03	1	NIC20.1528	NIC20	Taiwan	16	5/24/15	3	28.21790612	290	526.161616	0.30206496	0.082049717	0.76198489	0.084143247	1
wormd20150524s33NIC20GXW0023rt16w02r04	1	NIC20.1528	NIC20	Taiwan	16	5/24/15	4	29.27913061	156	474.018634	0.36250863	0.082049717	0.78062087	0.084143247	1
wormd20150524s33NIC20GXW0023rt16w02r05	1	NIC20.1528	NIC20	Taiwan	16	5/24/15	5	30.3403551	193	469.01	0.27272367	0.082049717	0.78175266	0.084143247	1
wormd20150524s33NIC20GXW0023rt16w02r06	1	NIC20.1528	NIC20	Taiwan	16	5/24/15	6	31.40157959	199	486.537118	0.17169126	0.082049717	0.64109251	0.084143247	1
wormd20150524s33NIC20GXW0023rt16w02r07	1	NIC20.1528	NIC20	Taiwan	16	5/24/15	7	32.46280408	163	480.395604	0.0976696	0.082049717	0.11371303	0.084143247	0
wormd20150524s33NIC20GXW0023rt16w02r08	1	NIC20.1528	NIC20	Taiwan	16	5/24/15	8	33.52402857	227	472.786325	0.09090764	0.082049717	0.09106272	0.084143247	0
wormd20150524s33NIC20GXW0023rt16w02r11	1	NIC20.1528	NIC20	Taiwan	16	5/24/15	11	36.70770204	188	479.533679	0.0942883	0.082049717	0.09392912	0.084143247	0
wormd20150524s33NIC20GXW0023rt16w02r12	1	NIC20.1528	NIC20	Taiwan	16	5/24/15	12	37.76892653	293	479.643333	0.09091517	0.082049717	0.09026969	0.084143247	0
wormd20150524s33NIC20GXW0023rt16w02r13	1	NIC20.1528	NIC20	Taiwan	16	5/24/15	13	38.83015102	293	485.363333	0.09305737	0.082049717	0.09193005	0.084143247	0
wormd20150524s33NIC20GXW0023rt16w02r14	1	NIC20.1528	NIC20	Taiwan	16	5/24/15	14	39.89137551	293	484.72	0.09487573	0.082049717	0.09446408	0.084143247	0
wormd20150524s33NIC20GXW0023rt16w02r15	1	NIC20.1528	NIC20	Taiwan	16	5/24/15	15	40.9526	293	503.143333	0.08204972	0.082049717	0.08414325	0.084143247	0
wormd20150524s33NIC20GXW0023rt16w03r00	2	NIC20.1529	NIC20	Taiwan	16	5/24/15	0	25.03423265	293	492.99	0.45207049	0.054933959	0.7708941	0.079650612	1
wormd20150524s33NIC20GXW0023rt16w03r01	2	NIC20.1529	NIC20	Taiwan	16	5/24/15	1	26.09545714	108	287.473684	0.29136039	0.054933959	0.40108107	0.079650612	1
wormd20150524s33NIC20GXW0023rt16w03r02	2	NIC20.1529	NIC20	Taiwan	16	5/24/15	2	27.15668163	144	506.211921	0.31811475	0.054933959	0.6897863	0.079650612	1
wormd20150524s33NIC20GXW0023rt16w03r03	2	NIC20.1529	NIC20	Taiwan	16	5/24/15	3	28.21790612	275	544.269504	0.35935057	0.054933959	0.77117123	0.079650612	1
wormd20150524s33NIC20GXW0023rt16w03r05	2	NIC20.1529	NIC20	Taiwan	16	5/24/15	5	30.3403551	210	502.059908	0.22614754	0.054933959	0.72548838	0.079650612	1
wormd20150524s33NIC20GXW0023rt16w03r06	2	NIC20.1529	NIC20	Taiwan	16	5/24/15	6	31.40157959	118	320.154472	0.05493396	0.054933959	0.14824596	0.079650612	1
wormd20150524s33NIC20GXW0023rt16w03r08	2	NIC20.1529	NIC20	Taiwan	16	5/24/15	8	33.52402857	262	387.07971	0.07845654	0.054933959	0.07965061	0.079650612	0
wormd20150524s33NIC20GXW0023rt16w07r00	6	NIC20.1530	NIC20	Taiwan	16	5/24/15	0	25.03423265	269	489.224638	0.4820062	0.04056865	0.72125979	0.046293493	1
wormd20150524s33NIC20GXW0023rt16w07r01	6	NIC20.1530	NIC20	Taiwan	16	5/24/15	1	26.09545714	202	486.717703	0.44032687	0.04056865	0.79430476	0.046293493	1
wormd20150524s33NIC20GXW0023rt16w07r02	6	NIC20.1530	NIC20	Taiwan	16	5/24/15	2	27.15668163	184	471.658163	0.41464137	0.04056865	0.76861056	0.046293493	1
wormd20150524s33NIC20GXW0023rt16w07r04	6	NIC20.1530	NIC20	Taiwan	16	5/24/15	4	29.27913061	173	403.291005	0.34422293	0.04056865	0.73305673	0.046293493	1
wormd20150524s33NIC20GXW0023rt16w07r05	6	NIC20.1530	NIC20	Taiwan	16	5/24/15	5	30.3403551	113	455.891667	0.33763471	0.04056865	0.74285989	0.046293493	1
wormd20150524s33NIC20GXW0023rt16w07r07	6	NIC20.1530	NIC20	Taiwan	16	5/24/15	7	32.46280408	244	485.738956	0.15086655	0.04056865	0.57253783	0.046293493	1
wormd20150524s33NIC20GXW0023rt16w07r08	6	NIC20.1530	NIC20	Taiwan	16	5/24/15	8	33.52402857	293	448.143333	0.10663718	0.04056865	0.11301362	0.046293493	0
wormd20150524s33NIC20GXW0023rt16w07r09	6	NIC20.1530	NIC20	Taiwan	16	5/24/15	9	34.58525306	293	427.346667	0.10932925	0.04056865	0.10855408	0.046293493	0
wormd20150524s33NIC20GXW0023rt16w07r10	6	NIC20.1530	NIC20	Taiwan	16	5/24/15	10	35.64647755	293	421.693333	0.1009186	0.04056865	0.10596238	0.046293493	0
wormd20150524s33NIC20GXW0023rt16w07r11	6	NIC20.1530	NIC20	Taiwan	16	5/24/15	11	36.70770204	292	379.234114	0.10306772	0.04056865	0.10273973	0.046293493	0
wormd20150524s33NIC20GXW0023rt16w07r15	6	NIC20.1530	NIC20	Taiwan	16	5/24/15	15	40.9526	182	487.828704	0.04056865	0.04056865	0.04629349	0.046293493	0
wormd20150524s33NIC20GXW0023rt16w08r00	7	NIC20.1531	NIC20	Taiwan	16	5/24/15	0	25.03423265	219	573.404167	0.41715674	0.091653585	0.7630609	0.096353723	1
wormd20150524s33NIC20GXW0023rt16w08r02	7	NIC20.1531	NIC20	Taiwan	16	5/24/15	2	27.15668163	109	564.688525	0.39791497	0.091653585	0.80695536	0.096353723	1
wormd20150524s33NIC20GXW0023rt16w08r07	7	NIC20.1531	NIC20	Taiwan	16	5/24/15	7	32.46280408	293	590.723333	0.21124214	0.091653585	0.74931875	0.096353723	1
wormd20150524s33NIC20GXW0023rt16w08r08	7	NIC20.1531	NIC20	Taiwan	16	5/24/15	8	33.52402857	293	613.873333	0.09165359	0.091653585	0.1069324	0.096353723	0
wormd20150524s33NIC20GXW0023rt16w08r09	7	NIC20.1531	NIC20	Taiwan	16	5/24/15	9	34.58525306	293	584.966667	0.09449718	0.091653585	0.09815935	0.096353723	0
wormd20150524s33NIC20GXW0023rt16w08r10	7	NIC20.1531	NIC20	Taiwan	16	5/24/15	10	35.64647755	293	545.136667	0.09564879	0.091653585	0.0994389	0.096353723	0
wormd20150524s33NIC20GXW0023rt16w08r11	7	NIC20.1531	NIC20	Taiwan	16	5/24/15	11	36.70770204	293	538.556667	0.10389852	0.091653585	0.1045817	0.096353723	0
wormd20150524s33NIC20GXW0023rt16w08r12	7	NIC20.1531	NIC20	Taiwan	16	5/24/15	12	37.76892653	293	514.566667	0.10076698	0.091653585	0.10027664	0.096353723	0
wormd20150524s33NIC20GXW0023rt16w08r13	7	NIC20.1531	NIC20	Taiwan	16	5/24/15	13	38.83015102	293	500.486667	0.11188029	0.091653585	0.11327618	0.096353723	0
wormd20150524s33NIC20GXW0023rt16w08r14	7	NIC20.1531	NIC20	Taiwan	16	5/24/15	14	39.89137551	293	486.46	0.10023894	0.091653585	0.10185774	0.096353723	0
wormd20150524s33NIC20GXW0023rt16w08r15	7	NIC20.1531	NIC20	Taiwan	16	5/24/15	15	40.9526	293	502.806667	0.09481061	0.091653585	0.09635372	0.096353723	0
wormd20150524s33NIC20GXW0023rt16w09r00	8	NIC20.1532	NIC20	Taiwan	16	5/24/15	0	25.03423265	197	399.230392	0.42174356	0.089970569	0.57617701	0.09031842	1
wormd20150524s33NIC20GXW0023rt16w09r08	8	NIC20.1532	NIC20	Taiwan	16	5/24/15	8	33.52402857	293	491.476667	0.10253205	0.089970569	0.14983115	0.09031842	1
wormd20150524s33NIC20GXW0023rt16w09r09	8	NIC20.1532	NIC20	Taiwan	16	5/24/15	9	34.58525306	293	510.38	0.09881527	0.089970569	0.10071935	0.09031842	0
wormd20150524s33NIC20GXW0023rt16w09r10	8	NIC20.1532	NIC20	Taiwan	16	5/24/15	10	35.64647755	293	508.533333	0.08997057	0.089970569	0.09031842	0.09031842	0
wormd20150524s33NIC20GXW0023rt16w09r11	8	NIC20.1532	NIC20	Taiwan	16	5/24/15	11	36.70770204	293	484.066667	0.09230738	0.089970569	0.09311091	0.09031842	0
wormd20150524s33NIC20GXW0023rt16w09r12	8	NIC20.1532	NIC20	Taiwan	16	5/24/15	12	37.76892653	293	493.44	0.09802316	0.089970569	0.0967011	0.09031842	0
wormd20150524s33NIC20GXW0023rt16w09r13	8	NIC20.1532	NIC20	Taiwan	16	5/24/15	13	38.83015102	293	474.623333	0.09831945	0.089970569	0.09913362	0.09031842	0
wormd20150524s33NIC20GXW0023rt16w09r14	8	NIC20.1532	NIC20	Taiwan	16	5/24/15	14	39.89137551	293	445.27	0.10251319	0.089970569	0.10258613	0.09031842	0
wormd20150524s33NIC20GXW0023rt16w09r15	8	NIC20.1532	NIC20	Taiwan	16	5/24/15	15	40.9526	293	423.453333	0.10079626	0.089970569	0.10301241	0.09031842	0
wormd20150524s33NIC20GXW0023rt16w13r00	12	NIC20.1533	NIC20	Taiwan	16	5/24/15	0	25.03423265	256	564.974265	0.42050303	0.072645185	0.78772081	0.092980337	1
wormd20150524s33NIC20GXW0023rt16w13r01	12	NIC20.1533	NIC20	Taiwan	16	5/24/15	1	26.09545714	188	434.712821	0.47539556	0.072645185	0.81827162	0.092980337	1
wormd20150524s33NIC20GXW0023rt16w13r02	12	NIC20.1533	NIC20	Taiwan	16	5/24/15	2	27.15668163	143	531.361111	0.38004649	0.072645185	0.75882946	0.092980337	1
wormd20150524s33NIC20GXW0023rt16w13r03	12	NIC20.1533	NIC20	Taiwan	16	5/24/15	3	28.21790612	279	560.863636	0.38153445	0.072645185	0.75341733	0.092980337	1
wormd20150524s33NIC20GXW0023rt16w13r04	12	NIC20.1533	NIC20	Taiwan	16	5/24/15	4	29.27913061	285	525.082192	0.40148488	0.072645185	0.80452487	0.092980337	1
wormd20150524s33NIC20GXW0023rt16w13r05	12	NIC20.1533	NIC20	Taiwan	16	5/24/15	5	30.3403551	177	596.197802	0.30426233	0.072645185	0.74447886	0.092980337	1
wormd20150524s33NIC20GXW0023rt16w13r06	12	NIC20.1533	NIC20	Taiwan	16	5/24/15	6	31.40157959	115	256.635593	0.07264518	0.072645185	0.18956963	0.092980337	1
wormd20150524s33NIC20GXW0023rt16w13r07	12	NIC20.1533	NIC20	Taiwan	16	5/24/15	7	32.46280408	243	503.192	0.17782797	0.072645185	0.57845352	0.092980337	1
wormd20150524s33NIC20GXW0023rt16w13r08	12	NIC20.1533	NIC20	Taiwan	16	5/24/15	8	33.52402857	293	614.61	0.10754437	0.072645185	0.21783818	0.092980337	1
wormd20150524s33NIC20GXW0023rt16w13r09	12	NIC20.1533	NIC20	Taiwan	16	5/24/15	9	34.58525306	293	570.046667	0.1032929	0.072645185	0.10873495	0.092980337	0
wormd20150524s33NIC20GXW0023rt16w13r10	12	NIC20.1533	NIC20	Taiwan	16	5/24/15	10	35.64647755	293	543.503333	0.1039122	0.072645185	0.10690761	0.092980337	0
wormd20150524s33NIC20GXW0023rt16w13r11	12	NIC20.1533	NIC20	Taiwan	16	5/24/15	11	36.70770204	293	565.226667	0.10171819	0.072645185	0.10347615	0.092980337	0
wormd20150524s33NIC20GXW0023rt16w13r12	12	NIC20.1533	NIC20	Taiwan	16	5/24/15	12	37.76892653	293	571.843333	0.101439	0.072645185	0.10210069	0.092980337	0
wormd20150524s33NIC20GXW0023rt16w13r13	12	NIC20.1533	NIC20	Taiwan	16	5/24/15	13	38.83015102	293	599.456667	0.10499394	0.072645185	0.10402223	0.092980337	0
wormd20150524s33NIC20GXW0023rt16w13r14	12	NIC20.1533	NIC20	Taiwan	16	5/24/15	14	39.89137551	293	647.846667	0.09682351	0.072645185	0.09718873	0.092980337	0
wormd20150524s33NIC20GXW0023rt16w13r15	12	NIC20.1533	NIC20	Taiwan	16	5/24/15	15	40.9526	293	652.426667	0.09221487	0.072645185	0.09298034	0.092980337	0
wormd20150524s33NIC20GXW0023rt16w14r00	13	NIC20.1534	NIC20	Taiwan	16	5/24/15	0	25.03423265	277	586.570423	0.41705687	0.086906425	0.76883518	0.087722503	1
wormd20150524s33NIC20GXW0023rt16w14r01	13	NIC20.1534	NIC20	Taiwan	16	5/24/15	1	26.09545714	138	618.826389	0.40956067	0.086906425	0.72654638	0.087722503	1
wormd20150524s33NIC20GXW0023rt16w14r07	13	NIC20.1534	NIC20	Taiwan	16	5/24/15	7	32.46280408	293	597.476667	0.09934355	0.086906425	0.14716805	0.087722503	1
wormd20150524s33NIC20GXW0023rt16w14r08	13	NIC20.1534	NIC20	Taiwan	16	5/24/15	8	33.52402857	293	640.586667	0.09014712	0.086906425	0.09143176	0.087722503	0
wormd20150524s33NIC20GXW0023rt16w14r09	13	NIC20.1534	NIC20	Taiwan	16	5/24/15	9	34.58525306	293	629.596667	0.08690642	0.086906425	0.0877225	0.087722503	0
wormd20150524s33NIC20GXW0023rt16w14r10	13	NIC20.1534	NIC20	Taiwan	16	5/24/15	10	35.64647755	293	627.436667	0.08754686	0.086906425	0.08827272	0.087722503	0
wormd20150524s33NIC20GXW0023rt16w14r11	13	NIC20.1534	NIC20	Taiwan	16	5/24/15	11	36.70770204	293	601.2	0.08892323	0.086906425	0.08795539	0.087722503	0
wormd20150524s33NIC20GXW0023rt16w14r12	13	NIC20.1534	NIC20	Taiwan	16	5/24/15	12	37.76892653	293	576.933333	0.0930768	0.086906425	0.09313946	0.087722503	0
wormd20150524s33NIC20GXW0023rt16w14r13	13	NIC20.1534	NIC20	Taiwan	16	5/24/15	13	38.83015102	293	589.916667	0.09273323	0.086906425	0.09257616	0.087722503	0
wormd20150524s33NIC20GXW0023rt16w14r14	13	NIC20.1534	NIC20	Taiwan	16	5/24/15	14	39.89137551	293	591.766667	0.09648339	0.086906425	0.09507656	0.087722503	0
wormd20150524s33NIC20GXW0023rt16w14r15	13	NIC20.1534	NIC20	Taiwan	16	5/24/15	15	40.9526	293	571.633333	0.08877076	0.086906425	0.08930682	0.087722503	0
wormd20150524s33NIC20GXW0023rt16w15r00	14	NIC20.1535	NIC20	Taiwan	16	5/24/15	0	25.03423265	272	521.810036	0.3933318	0.099854786	0.79963036	0.099164489	1
wormd20150524s33NIC20GXW0023rt16w15r03	14	NIC20.1535	NIC20	Taiwan	16	5/24/15	3	28.21790612	146	493.171975	0.30379716	0.099854786	0.76691666	0.099164489	1
wormd20150524s33NIC20GXW0023rt16w15r04	14	NIC20.1535	NIC20	Taiwan	16	5/24/15	4	29.27913061	187	520.973214	0.29269339	0.099854786	0.81803375	0.099164489	1
wormd20150524s33NIC20GXW0023rt16w15r05	14	NIC20.1535	NIC20	Taiwan	16	5/24/15	5	30.3403551	230	521.263374	0.29399369	0.099854786	0.79932297	0.099164489	1
wormd20150524s33NIC20GXW0023rt16w15r06	14	NIC20.1535	NIC20	Taiwan	16	5/24/15	6	31.40157959	124	438.909574	0.20604649	0.099854786	0.76660811	0.099164489	1
wormd20150524s33NIC20GXW0023rt16w15r07	14	NIC20.1535	NIC20	Taiwan	16	5/24/15	7	32.46280408	189	532.657407	0.12245309	0.099854786	0.3277193	0.099164489	1
wormd20150524s33NIC20GXW0023rt16w15r08	14	NIC20.1535	NIC20	Taiwan	16	5/24/15	8	33.52402857	243	411.136	0.1131855	0.099854786	0.11659017	0.099164489	0
wormd20150524s33NIC20GXW0023rt16w15r09	14	NIC20.1535	NIC20	Taiwan	16	5/24/15	9	34.58525306	293	415.98	0.12043662	0.099854786	0.13089396	0.099164489	0
wormd20150524s33NIC20GXW0023rt16w15r10	14	NIC20.1535	NIC20	Taiwan	16	5/24/15	10	35.64647755	252	350.65251	0.1014932	0.099854786	0.10371556	0.099164489	0
wormd20150524s33NIC20GXW0023rt16w15r11	14	NIC20.1535	NIC20	Taiwan	16	5/24/15	11	36.70770204	269	348.847826	0.09985479	0.099854786	0.09916449	0.099164489	0
wormd20150524s33NIC20GXW0023rt16w15r12	14	NIC20.1535	NIC20	Taiwan	16	5/24/15	12	37.76892653	293	361.436667	0.1155346	0.099854786	0.11784854	0.099164489	0
wormd20150524s33NIC20GXW0023rt16w15r13	14	NIC20.1535	NIC20	Taiwan	16	5/24/15	13	38.83015102	292	360.006689	0.11878331	0.099854786	0.11922631	0.099164489	0
wormd20150524s33NIC20GXW0023rt16w15r14	14	NIC20.1535	NIC20	Taiwan	16	5/24/15	14	39.89137551	291	392.255034	0.12329728	0.099854786	0.12190052	0.099164489	0
wormd20150524s33NIC20GXW0023rt16w15r15	14	NIC20.1535	NIC20	Taiwan	16	5/24/15	15	40.9526	290	410.292929	0.11254288	0.099854786	0.1143743	0.099164489	0
wormd20150525s32NIC20AF16rt16w01r00	0	NIC20.1545	NIC20	Taiwan	16	5/25/15	0	25.03423265	255	532.335878	0.44621821	0.072283051	0.77742259	0.085641318	1
wormd20150525s32NIC20AF16rt16w01r01	0	NIC20.1545	NIC20	Taiwan	16	5/25/15	1	26.09545714	224	526.168831	0.38160654	0.072283051	0.77834331	0.085641318	1
wormd20150525s32NIC20AF16rt16w01r02	0	NIC20.1545	NIC20	Taiwan	16	5/25/15	2	27.15668163	179	544.032609	0.37359281	0.072283051	0.76668287	0.085641318	1
wormd20150525s32NIC20AF16rt16w01r03	0	NIC20.1545	NIC20	Taiwan	16	5/25/15	3	28.21790612	287	594.97619	0.34335764	0.072283051	0.77781909	0.085641318	1
wormd20150525s32NIC20AF16rt16w01r04	0	NIC20.1545	NIC20	Taiwan	16	5/25/15	4	29.27913061	290	518.56229	0.35536874	0.072283051	0.79085258	0.085641318	1
wormd20150525s32NIC20AF16rt16w01r05	0	NIC20.1545	NIC20	Taiwan	16	5/25/15	5	30.3403551	293	527.713333	0.32190223	0.072283051	0.78560048	0.085641318	1
wormd20150525s32NIC20AF16rt16w01r06	0	NIC20.1545	NIC20	Taiwan	16	5/25/15	6	31.40157959	282	555.401384	0.2510912	0.072283051	0.73756661	0.085641318	1
wormd20150525s32NIC20AF16rt16w01r07	0	NIC20.1545	NIC20	Taiwan	16	5/25/15	7	32.46280408	213	581.576037	0.18261853	0.072283051	0.63361389	0.085641318	1
wormd20150525s32NIC20AF16rt16w01r08	0	NIC20.1545	NIC20	Taiwan	16	5/25/15	8	33.52402857	150	229.656085	0.07228305	0.072283051	0.08564132	0.085641318	0
wormd20150525s32NIC20AF16rt16w01r09	0	NIC20.1545	NIC20	Taiwan	16	5/25/15	9	34.58525306	293	374.65	0.11187979	0.072283051	0.11758186	0.085641318	0
wormd20150525s32NIC20AF16rt16w01r10	0	NIC20.1545	NIC20	Taiwan	16	5/25/15	10	35.64647755	293	374.296667	0.09970098	0.072283051	0.10075119	0.085641318	0
wormd20150525s32NIC20AF16rt16w01r11	0	NIC20.1545	NIC20	Taiwan	16	5/25/15	11	36.70770204	293	387.906667	0.10508759	0.072283051	0.10571109	0.085641318	0
wormd20150525s32NIC20AF16rt16w01r12	0	NIC20.1545	NIC20	Taiwan	16	5/25/15	12	37.76892653	293	385.603333	0.10569692	0.072283051	0.10472714	0.085641318	0
wormd20150525s32NIC20AF16rt16w01r13	0	NIC20.1545	NIC20	Taiwan	16	5/25/15	13	38.83015102	293	394.676667	0.1106933	0.072283051	0.1108582	0.085641318	0
wormd20150525s32NIC20AF16rt16w01r14	0	NIC20.1545	NIC20	Taiwan	16	5/25/15	14	39.89137551	293	397.546667	0.11593017	0.072283051	0.11802705	0.085641318	0
wormd20150525s32NIC20AF16rt16w01r15	0	NIC20.1545	NIC20	Taiwan	16	5/25/15	15	40.9526	293	376.886667	0.10045968	0.072283051	0.10485388	0.085641318	0
wormd20150525s32NIC20AF16rt16w02r00	1	NIC20.1546	NIC20	Taiwan	16	5/25/15	0	25.03423265	293	464.243333	0.41448477	0.062098898	0.77411131	0.061096829	1
wormd20150525s32NIC20AF16rt16w02r01	1	NIC20.1546	NIC20	Taiwan	16	5/25/15	1	26.09545714	283	473.658621	0.41385379	0.062098898	0.7779944	0.061096829	1
wormd20150525s32NIC20AF16rt16w02r02	1	NIC20.1546	NIC20	Taiwan	16	5/25/15	2	27.15668163	233	523.945833	0.36950506	0.062098898	0.77945873	0.061096829	1
wormd20150525s32NIC20AF16rt16w02r03	1	NIC20.1546	NIC20	Taiwan	16	5/25/15	3	28.21790612	196	475.61194	0.30774249	0.062098898	0.75576393	0.061096829	1
wormd20150525s32NIC20AF16rt16w02r08	1	NIC20.1546	NIC20	Taiwan	16	5/25/15	8	33.52402857	158	449.617284	0.10452891	0.062098898	0.13639746	0.061096829	0
wormd20150525s32NIC20AF16rt16w02r14	1	NIC20.1546	NIC20	Taiwan	16	5/25/15	14	39.89137551	111	403.146552	0.0620989	0.062098898	0.07320106	0.061096829	0
wormd20150525s32NIC20AF16rt16w02r15	1	NIC20.1546	NIC20	Taiwan	16	5/25/15	15	40.9526	151	401	0.06220909	0.062098898	0.06109683	0.061096829	0
wormd20150525s32NIC20AF16rt16w03r00	2	NIC20.1547	NIC20	Taiwan	16	5/25/15	0	25.03423265	279	597.552448	0.44470907	0.109588001	0.66902484	0.112363801	1
wormd20150525s32NIC20AF16rt16w03r01	2	NIC20.1547	NIC20	Taiwan	16	5/25/15	1	26.09545714	221	650.18107	0.39854905	0.109588001	0.67591848	0.112363801	1
wormd20150525s32NIC20AF16rt16w03r02	2	NIC20.1547	NIC20	Taiwan	16	5/25/15	2	27.15668163	159	659.569507	0.40537932	0.109588001	0.67801096	0.112363801	1
wormd20150525s32NIC20AF16rt16w03r05	2	NIC20.1547	NIC20	Taiwan	16	5/25/15	5	30.3403551	129	570.291971	0.23806648	0.109588001	0.67233979	0.112363801	1
wormd20150525s32NIC20AF16rt16w03r06	2	NIC20.1547	NIC20	Taiwan	16	5/25/15	6	31.40157959	128	580.769737	0.28441626	0.109588001	0.73790157	0.112363801	1
wormd20150525s32NIC20AF16rt16w03r07	2	NIC20.1547	NIC20	Taiwan	16	5/25/15	7	32.46280408	158	574.025381	0.2502081	0.109588001	0.74525452	0.112363801	1
wormd20150525s32NIC20AF16rt16w03r08	2	NIC20.1547	NIC20	Taiwan	16	5/25/15	8	33.52402857	281	605.391608	0.11935473	0.109588001	0.13747994	0.112363801	0
wormd20150525s32NIC20AF16rt16w03r09	2	NIC20.1547	NIC20	Taiwan	16	5/25/15	9	34.58525306	173	515.858757	0.109588	0.109588001	0.1123638	0.112363801	0
wormd20150525s32NIC20AF16rt16w03r10	2	NIC20.1547	NIC20	Taiwan	16	5/25/15	10	35.64647755	250	563.727626	0.12519096	0.109588001	0.13063071	0.112363801	0
wormd20150525s32NIC20AF16rt16w07r00	6	NIC20.1548	NIC20	Taiwan	16	5/25/15	0	25.03423265	272	507.164875	0.32980233	0.09304222	0.68612491	0.095428703	1
wormd20150525s32NIC20AF16rt16w07r01	6	NIC20.1548	NIC20	Taiwan	16	5/25/15	1	26.09545714	170	409.672316	0.2596259	0.09304222	0.58076395	0.095428703	1
wormd20150525s32NIC20AF16rt16w07r02	6	NIC20.1548	NIC20	Taiwan	16	5/25/15	2	27.15668163	290	503.148148	0.31850503	0.09304222	0.6944326	0.095428703	1
wormd20150525s32NIC20AF16rt16w07r03	6	NIC20.1548	NIC20	Taiwan	16	5/25/15	3	28.21790612	174	533.21547	0.31632175	0.09304222	0.69066635	0.095428703	1
wormd20150525s32NIC20AF16rt16w07r04	6	NIC20.1548	NIC20	Taiwan	16	5/25/15	4	29.27913061	243	470.212	0.24333655	0.09304222	0.70209655	0.095428703	1
wormd20150525s32NIC20AF16rt16w07r05	6	NIC20.1548	NIC20	Taiwan	16	5/25/15	5	30.3403551	117	423.612903	0.16759514	0.09304222	0.57326616	0.095428703	1
wormd20150525s32NIC20AF16rt16w07r07	6	NIC20.1548	NIC20	Taiwan	16	5/25/15	7	32.46280408	237	426.475207	0.10752327	0.09304222	0.2193866	0.095428703	1
wormd20150525s32NIC20AF16rt16w07r08	6	NIC20.1548	NIC20	Taiwan	16	5/25/15	8	33.52402857	293	420.433333	0.09819792	0.09304222	0.13621389	0.095428703	0
wormd20150525s32NIC20AF16rt16w07r09	6	NIC20.1548	NIC20	Taiwan	16	5/25/15	9	34.58525306	293	422.153333	0.1036047	0.09304222	0.14828023	0.095428703	1
wormd20150525s32NIC20AF16rt16w07r10	6	NIC20.1548	NIC20	Taiwan	16	5/25/15	10	35.64647755	293	414.083333	0.09304222	0.09304222	0.10717564	0.095428703	0
wormd20150525s32NIC20AF16rt16w07r11	6	NIC20.1548	NIC20	Taiwan	16	5/25/15	11	36.70770204	293	399.193333	0.09615687	0.09304222	0.09744279	0.095428703	0
wormd20150525s32NIC20AF16rt16w07r12	6	NIC20.1548	NIC20	Taiwan	16	5/25/15	12	37.76892653	293	400.706667	0.09718799	0.09304222	0.09805077	0.095428703	0
wormd20150525s32NIC20AF16rt16w07r13	6	NIC20.1548	NIC20	Taiwan	16	5/25/15	13	38.83015102	293	371.853333	0.09822161	0.09304222	0.0992878	0.095428703	0
wormd20150525s32NIC20AF16rt16w07r14	6	NIC20.1548	NIC20	Taiwan	16	5/25/15	14	39.89137551	293	354.486667	0.09698877	0.09304222	0.09775014	0.095428703	0
wormd20150525s32NIC20AF16rt16w07r15	6	NIC20.1548	NIC20	Taiwan	16	5/25/15	15	40.9526	293	349.776667	0.0955271	0.09304222	0.0954287	0.095428703	0
wormd20150525s32NIC20AF16rt16w08r00	7	NIC20.1549	NIC20	Taiwan	16	5/25/15	0	25.03423265	292	520.605351	0.50651099	0.008945097	0.78535637	0.008809273	1
wormd20150525s32NIC20AF16rt16w08r01	7	NIC20.1549	NIC20	Taiwan	16	5/25/15	1	26.09545714	100	597.666667	0.38651281	0.008945097	0.74199756	0.008809273	1
wormd20150525s32NIC20AF16rt16w08r02	7	NIC20.1549	NIC20	Taiwan	16	5/25/15	2	27.15668163	114	606.088	0.38243798	0.008945097	0.76315803	0.008809273	1
wormd20150525s32NIC20AF16rt16w08r04	7	NIC20.1549	NIC20	Taiwan	16	5/25/15	4	29.27913061	234	537.213768	0.34562036	0.008945097	0.82027834	0.008809273	1
wormd20150525s32NIC20AF16rt16w08r05	7	NIC20.1549	NIC20	Taiwan	16	5/25/15	5	30.3403551	233	613.275362	0.31204791	0.008945097	0.77899641	0.008809273	1
wormd20150525s32NIC20AF16rt16w08r06	7	NIC20.1549	NIC20	Taiwan	16	5/25/15	6	31.40157959	164	616.604061	0.20575001	0.008945097	0.7120605	0.008809273	1
wormd20150525s32NIC20AF16rt16w08r08	7	NIC20.1549	NIC20	Taiwan	16	5/25/15	8	33.52402857	293	540.05	0.06140463	0.008945097	0.06086933	0.008809273	0
wormd20150525s32NIC20AF16rt16w08r09	7	NIC20.1549	NIC20	Taiwan	16	5/25/15	9	34.58525306	232	632.312236	0.06216322	0.008945097	0.06804146	0.008809273	0
wormd20150525s32NIC20AF16rt16w08r10	7	NIC20.1549	NIC20	Taiwan	16	5/25/15	10	35.64647755	263	292.081481	0.03697771	0.008945097	0.03696746	0.008809273	0
wormd20150525s32NIC20AF16rt16w08r11	7	NIC20.1549	NIC20	Taiwan	16	5/25/15	11	36.70770204	290	303.326599	0.03288805	0.008945097	0.03272176	0.008809273	0
wormd20150525s32NIC20AF16rt16w08r12	7	NIC20.1549	NIC20	Taiwan	16	5/25/15	12	37.76892653	287	311.829932	0.03269517	0.008945097	0.03242786	0.008809273	0
wormd20150525s32NIC20AF16rt16w08r13	7	NIC20.1549	NIC20	Taiwan	16	5/25/15	13	38.83015102	290	328.289562	0.03616337	0.008945097	0.03603805	0.008809273	0
wormd20150525s32NIC20AF16rt16w08r14	7	NIC20.1549	NIC20	Taiwan	16	5/25/15	14	39.89137551	181	496.5	0.09346849	0.008945097	0.09478678	0.008809273	0
wormd20150525s32NIC20AF16rt16w08r15	7	NIC20.1549	NIC20	Taiwan	16	5/25/15	15	40.9526	293	172.743333	0.0089451	0.008945097	0.00880927	0.008809273	0
wormd20150525s32NIC20AF16rt16w09r00	8	NIC20.1550	NIC20	Taiwan	16	5/25/15	0	25.03423265	122	432.352	0.41141178	0.051691299	0.65387689	0.050964297	1
wormd20150525s32NIC20AF16rt16w09r03	8	NIC20.1550	NIC20	Taiwan	16	5/25/15	3	28.21790612	131	439.562914	0.42906272	0.051691299	0.80983193	0.050964297	1
wormd20150525s32NIC20AF16rt16w09r04	8	NIC20.1550	NIC20	Taiwan	16	5/25/15	4	29.27913061	153	490.036585	0.41596608	0.051691299	0.80299217	0.050964297	1
wormd20150525s32NIC20AF16rt16w09r05	8	NIC20.1550	NIC20	Taiwan	16	5/25/15	5	30.3403551	193	445.63285	0.3945355	0.051691299	0.76396235	0.050964297	1
wormd20150525s32NIC20AF16rt16w09r06	8	NIC20.1550	NIC20	Taiwan	16	5/25/15	6	31.40157959	249	420.859375	0.27727937	0.051691299	0.7619565	0.050964297	1
wormd20150525s32NIC20AF16rt16w09r11	8	NIC20.1550	NIC20	Taiwan	16	5/25/15	11	36.70770204	123	701.007937	0.0516913	0.051691299	0.0509643	0.050964297	0
wormd20150525s32NIC20AF16rt16w09r14	8	NIC20.1550	NIC20	Taiwan	16	5/25/15	14	39.89137551	152	132.689266	0.08227839	0.051691299	0.09371326	0.050964297	0
wormd20150525s32NIC20AF16rt16w09r15	8	NIC20.1550	NIC20	Taiwan	16	5/25/15	15	40.9526	103	139.876543	0.07808223	0.051691299	0.09283662	0.050964297	0
wormd20150525s32NIC20AF16rt16w13r00	12	NIC20.1551	NIC20	Taiwan	16	5/25/15	0	25.03423265	293	558.553333	0.32859915	0.118923968	0.60625464	0.144009831	1
wormd20150525s32NIC20AF16rt16w13r01	12	NIC20.1551	NIC20	Taiwan	16	5/25/15	1	26.09545714	280	533.592334	0.44717016	0.118923968	0.54506382	0.144009831	1
wormd20150525s32NIC20AF16rt16w13r02	12	NIC20.1551	NIC20	Taiwan	16	5/25/15	2	27.15668163	274	531.124555	0.39748714	0.118923968	0.62959554	0.144009831	1
wormd20150525s32NIC20AF16rt16w13r03	12	NIC20.1551	NIC20	Taiwan	16	5/25/15	3	28.21790612	263	504.669145	0.43963652	0.118923968	0.69598008	0.144009831	1
wormd20150525s32NIC20AF16rt16w13r04	12	NIC20.1551	NIC20	Taiwan	16	5/25/15	4	29.27913061	277	534.559859	0.38641997	0.118923968	0.65180318	0.144009831	1
wormd20150525s32NIC20AF16rt16w13r05	12	NIC20.1551	NIC20	Taiwan	16	5/25/15	5	30.3403551	264	543.055351	0.36255772	0.118923968	0.65834614	0.144009831	1
wormd20150525s32NIC20AF16rt16w13r06	12	NIC20.1551	NIC20	Taiwan	16	5/25/15	6	31.40157959	276	515.392226	0.23092454	0.118923968	0.68332147	0.144009831	1
wormd20150525s32NIC20AF16rt16w13r07	12	NIC20.1551	NIC20	Taiwan	16	5/25/15	7	32.46280408	231	553.268908	0.18060411	0.118923968	0.53683941	0.144009831	1
wormd20150525s32NIC20AF16rt16w13r09	12	NIC20.1551	NIC20	Taiwan	16	5/25/15	9	34.58525306	142	385.4375	0.11892397	0.118923968	0.14400983	0.144009831	1
wormd20150525s32NIC20AF16rt16w14r00	13	NIC20.1552	NIC20	Taiwan	16	5/25/15	0	25.03423265	281	674.111864	0.4424292	0.042864725	0.64483472	0.05044176	1
wormd20150525s32NIC20AF16rt16w14r04	13	NIC20.1552	NIC20	Taiwan	16	5/25/15	4	29.27913061	279	638.842657	0.23137928	0.042864725	0.68180528	0.05044176	1
wormd20150525s32NIC20AF16rt16w14r05	13	NIC20.1552	NIC20	Taiwan	16	5/25/15	5	30.3403551	293	639.676667	0.27041262	0.042864725	0.71244416	0.05044176	1
wormd20150525s32NIC20AF16rt16w14r11	13	NIC20.1552	NIC20	Taiwan	16	5/25/15	11	36.70770204	114	723.832402	0.04460568	0.042864725	0.06256801	0.05044176	0
wormd20150525s32NIC20AF16rt16w14r15	13	NIC20.1552	NIC20	Taiwan	16	5/25/15	15	40.9526	109	629.070352	0.04286472	0.042864725	0.05044176	0.05044176	0
wormd20150525s32NIC20AF16rt16w15r00	14	NIC20.1553	NIC20	Taiwan	16	5/25/15	0	25.03423265	287	520.863946	0.41642047	0.103739808	0.76398436	0.103976924	1
wormd20150525s32NIC20AF16rt16w15r01	14	NIC20.1553	NIC20	Taiwan	16	5/25/15	1	26.09545714	280	559.15331	0.39858377	0.103739808	0.78040986	0.103976924	1
wormd20150525s32NIC20AF16rt16w15r02	14	NIC20.1553	NIC20	Taiwan	16	5/25/15	2	27.15668163	192	635.066351	0.2706958	0.103739808	0.68812718	0.103976924	1
wormd20150525s32NIC20AF16rt16w15r03	14	NIC20.1553	NIC20	Taiwan	16	5/25/15	3	28.21790612	235	582.07438	0.31294264	0.103739808	0.75686341	0.103976924	1
wormd20150525s32NIC20AF16rt16w15r04	14	NIC20.1553	NIC20	Taiwan	16	5/25/15	4	29.27913061	280	533.379791	0.30953461	0.103739808	0.77689551	0.103976924	1
wormd20150525s32NIC20AF16rt16w15r05	14	NIC20.1553	NIC20	Taiwan	16	5/25/15	5	30.3403551	175	572.575419	0.22098548	0.103739808	0.69263994	0.103976924	1
wormd20150525s32NIC20AF16rt16w15r07	14	NIC20.1553	NIC20	Taiwan	16	5/25/15	7	32.46280408	220	447.466667	0.12352683	0.103739808	0.13080442	0.103976924	0
wormd20150525s32NIC20AF16rt16w15r08	14	NIC20.1553	NIC20	Taiwan	16	5/25/15	8	33.52402857	106	484.155963	0.15896988	0.103739808	0.18228443	0.103976924	1
wormd20150525s32NIC20AF16rt16w15r09	14	NIC20.1553	NIC20	Taiwan	16	5/25/15	9	34.58525306	170	481.630682	0.15017841	0.103739808	0.17408779	0.103976924	1
wormd20150525s32NIC20AF16rt16w15r11	14	NIC20.1553	NIC20	Taiwan	16	5/25/15	11	36.70770204	257	479.507576	0.11155552	0.103739808	0.11297049	0.103976924	0
wormd20150525s32NIC20AF16rt16w15r12	14	NIC20.1553	NIC20	Taiwan	16	5/25/15	12	37.76892653	293	478.75	0.10373981	0.103739808	0.10397692	0.103976924	0
wormd20150525s32NIC20AF16rt16w15r13	14	NIC20.1553	NIC20	Taiwan	16	5/25/15	13	38.83015102	293	477.496667	0.10701395	0.103739808	0.10757021	0.103976924	0
wormd20150601s3ED3092NIC20rt16w04r00	3	NIC20.1558	NIC20	Taiwan	16	6/01/15	0	25	229	476.728814	0.46256881	0.077979482	0.63619816	0.078496723	1
wormd20150601s3ED3092NIC20rt16w04r01	3	NIC20.1558	NIC20	Taiwan	16	6/01/15	1	24	284	541.311419	0.372003	0.077979482	0.61932666	0.078496723	1
wormd20150601s3ED3092NIC20rt16w04r02	3	NIC20.1558	NIC20	Taiwan	16	6/01/15	2	23	289	534.125	0.39749754	0.077979482	0.72476255	0.078496723	1
wormd20150601s3ED3092NIC20rt16w04r03	3	NIC20.1558	NIC20	Taiwan	16	6/01/15	3	22	237	538.942623	0.40380527	0.077979482	0.72541373	0.078496723	1
wormd20150601s3ED3092NIC20rt16w04r04	3	NIC20.1558	NIC20	Taiwan	16	6/01/15	4	21	113	528.763158	0.34669723	0.077979482	0.67724384	0.078496723	1
wormd20150601s3ED3092NIC20rt16w04r05	3	NIC20.1558	NIC20	Taiwan	16	6/01/15	5	20	181	514.56383	0.36042098	0.077979482	0.76094159	0.078496723	1
wormd20150601s3ED3092NIC20rt16w04r06	3	NIC20.1558	NIC20	Taiwan	16	6/01/15	6	19	287	547.755102	0.35459714	0.077979482	0.777469	0.078496723	1
wormd20150601s3ED3092NIC20rt16w04r07	3	NIC20.1558	NIC20	Taiwan	16	6/01/15	7	18	193	575.365	0.36509437	0.077979482	0.77433177	0.078496723	1
wormd20150601s3ED3092NIC20rt16w04r09	3	NIC20.1558	NIC20	Taiwan	16	6/01/15	9	16	286	525.430034	0.26785257	0.077979482	0.74243187	0.078496723	1
wormd20150601s3ED3092NIC20rt16w04r10	3	NIC20.1558	NIC20	Taiwan	16	6/01/15	10	15	263	527.505576	0.3067431	0.077979482	0.78701119	0.078496723	1
wormd20150601s3ED3092NIC20rt16w04r11	3	NIC20.1558	NIC20	Taiwan	16	6/01/15	11	14	293	492.94	0.09603012	0.077979482	0.23458239	0.078496723	1
wormd20150601s3ED3092NIC20rt16w04r12	3	NIC20.1558	NIC20	Taiwan	16	6/01/15	12	13	293	501.08	0.09864874	0.077979482	0.23503689	0.078496723	1
wormd20150601s3ED3092NIC20rt16w04r13	3	NIC20.1558	NIC20	Taiwan	16	6/01/15	13	12	293	530.186667	0.08899617	0.077979482	0.14852481	0.078496723	1
wormd20150601s3ED3092NIC20rt16w04r14	3	NIC20.1558	NIC20	Taiwan	16	6/01/15	14	11	293	514.45	0.08874452	0.077979482	0.12545888	0.078496723	0
wormd20150601s3ED3092NIC20rt16w04r15	3	NIC20.1558	NIC20	Taiwan	16	6/01/15	15	10	293	544.02	0.0816378	0.077979482	0.09632453	0.078496723	0
wormd20150601s3ED3092NIC20rt16w04r16	3	NIC20.1558	NIC20	Taiwan	16	6/01/15	16	9	293	523.83	0.07797948	0.077979482	0.07849672	0.078496723	0
wormd20150601s3ED3092NIC20rt16w05r00	4	NIC20.1559	NIC20	Taiwan	16	6/01/15	0	25	105	411.439252	0.41528535	0.064451444	0.58711262	0.1069628	1
wormd20150601s3ED3092NIC20rt16w05r01	4	NIC20.1559	NIC20	Taiwan	16	6/01/15	1	24	166	501.549133	0.33829369	0.064451444	0.68151694	0.1069628	1
wormd20150601s3ED3092NIC20rt16w05r02	4	NIC20.1559	NIC20	Taiwan	16	6/01/15	2	23	153	430.73125	0.37018259	0.064451444	0.71329863	0.1069628	1
wormd20150601s3ED3092NIC20rt16w05r03	4	NIC20.1559	NIC20	Taiwan	16	6/01/15	3	22	230	444.56962	0.4052985	0.064451444	0.72356768	0.1069628	1
wormd20150601s3ED3092NIC20rt16w05r05	4	NIC20.1559	NIC20	Taiwan	16	6/01/15	5	20	238	478.073469	0.35807791	0.064451444	0.77080109	0.1069628	1
wormd20150601s3ED3092NIC20rt16w05r06	4	NIC20.1559	NIC20	Taiwan	16	6/01/15	6	19	293	515.17	0.3319293	0.064451444	0.77609056	0.1069628	1
wormd20150601s3ED3092NIC20rt16w05r07	4	NIC20.1559	NIC20	Taiwan	16	6/01/15	7	18	153	484.5625	0.3051913	0.064451444	0.78683441	0.1069628	1
wormd20150601s3ED3092NIC20rt16w05r08	4	NIC20.1559	NIC20	Taiwan	16	6/01/15	8	17	269	469.75	0.27455662	0.064451444	0.72271869	0.1069628	1
wormd20150601s3ED3092NIC20rt16w05r10	4	NIC20.1559	NIC20	Taiwan	16	6/01/15	10	15	293	497.533333	0.25398751	0.064451444	0.77349588	0.1069628	1
wormd20150601s3ED3092NIC20rt16w05r12	4	NIC20.1559	NIC20	Taiwan	16	6/01/15	12	13	105	337.155963	0.06445144	0.064451444	0.14049093	0.1069628	1
wormd20150601s3ED3092NIC20rt16w05r15	4	NIC20.1559	NIC20	Taiwan	16	6/01/15	15	10	135	387.255319	0.07538536	0.064451444	0.11634348	0.1069628	0
wormd20150601s3ED3092NIC20rt16w05r16	4	NIC20.1559	NIC20	Taiwan	16	6/01/15	16	9	289	525.956081	0.10505934	0.064451444	0.1069628	0.1069628	0
wormd20150601s3ED3092NIC20rt16w06r00	5	NIC20.1560	NIC20	Taiwan	16	6/01/15	0	25	270	537.855596	0.3803972	0.153600389	0.59198866	0.160556186	1
wormd20150601s3ED3092NIC20rt16w06r01	5	NIC20.1560	NIC20	Taiwan	16	6/01/15	1	24	144	156.912162	0.15360039	0.153600389	0.16055619	0.160556186	1
wormd20150601s3ED3092NIC20rt16w06r02	5	NIC20.1560	NIC20	Taiwan	16	6/01/15	2	23	119	524.984496	0.34175298	0.153600389	0.54710899	0.160556186	1
wormd20150601s3ED3092NIC20rt16w06r03	5	NIC20.1560	NIC20	Taiwan	16	6/01/15	3	22	127	519.074627	0.34039831	0.153600389	0.57949944	0.160556186	1
wormd20150601s3ED3092NIC20rt16w06r05	5	NIC20.1560	NIC20	Taiwan	16	6/01/15	5	20	188	459.473958	0.30749943	0.153600389	0.6036372	0.160556186	1
wormd20150601s3ED3092NIC20rt16w06r06	5	NIC20.1560	NIC20	Taiwan	16	6/01/15	6	19	186	420.626943	0.26612919	0.153600389	0.50411151	0.160556186	1
wormd20150601s3ED3092NIC20rt16w06r07	5	NIC20.1560	NIC20	Taiwan	16	6/01/15	7	18	129	162.595588	0.17208349	0.153600389	0.17809458	0.160556186	1
wormd20150601s3ED3092NIC20rt16w06r08	5	NIC20.1560	NIC20	Taiwan	16	6/01/15	8	17	225	608.771084	0.27430788	0.153600389	0.66874517	0.160556186	1
wormd20150601s3ED3092NIC20rt16w06r09	5	NIC20.1560	NIC20	Taiwan	16	6/01/15	9	16	202	141.533654	0.17204268	0.153600389	0.17481569	0.160556186	1
wormd20150601s3ED3092NIC20rt16w06r10	5	NIC20.1560	NIC20	Taiwan	16	6/01/15	10	15	150	146.044586	0.19388755	0.153600389	0.20133524	0.160556186	1
wormd20150601s3ED3092NIC20rt16w06r11	5	NIC20.1560	NIC20	Taiwan	16	6/01/15	11	14	142	129.310811	0.18838	0.153600389	0.18536827	0.160556186	1
wormd20150601s3ED3092NIC20rt16w06r12	5	NIC20.1560	NIC20	Taiwan	16	6/01/15	12	13	166	129.722543	0.17669735	0.153600389	0.18397425	0.160556186	1
wormd20150601s3ED3092NIC20rt16w06r13	5	NIC20.1560	NIC20	Taiwan	16	6/01/15	13	12	117	143.745902	0.19417949	0.153600389	0.19631795	0.160556186	1
wormd20150601s3ED3092NIC20rt16w06r15	5	NIC20.1560	NIC20	Taiwan	16	6/01/15	15	10	242	265.53012	0.16452216	0.153600389	0.1869564	0.160556186	1
wormd20150601s3ED3092NIC20rt16w06r16	5	NIC20.1560	NIC20	Taiwan	16	6/01/15	16	9	154	244.745223	0.22054915	0.153600389	0.28064427	0.160556186	1
wormd20150601s3ED3092NIC20rt16w10r00	9	NIC20.1561	NIC20	Taiwan	16	6/01/15	0	25	208	537.837209	0.44658906	0.042885262	0.67989715	0.045698466	1
wormd20150601s3ED3092NIC20rt16w10r01	9	NIC20.1561	NIC20	Taiwan	16	6/01/15	1	24	198	514.721951	0.3293387	0.042885262	0.52231346	0.045698466	1
wormd20150601s3ED3092NIC20rt16w10r02	9	NIC20.1561	NIC20	Taiwan	16	6/01/15	2	23	245	529.781746	0.36800739	0.042885262	0.68451659	0.045698466	1
wormd20150601s3ED3092NIC20rt16w10r03	9	NIC20.1561	NIC20	Taiwan	16	6/01/15	3	22	224	548.376623	0.38732419	0.042885262	0.75591601	0.045698466	1
wormd20150601s3ED3092NIC20rt16w10r04	9	NIC20.1561	NIC20	Taiwan	16	6/01/15	4	21	205	587.648352	0.39543177	0.042885262	0.74460955	0.045698466	1
wormd20150601s3ED3092NIC20rt16w10r05	9	NIC20.1561	NIC20	Taiwan	16	6/01/15	5	20	145	477.446667	0.36221692	0.042885262	0.66412	0.045698466	1
wormd20150601s3ED3092NIC20rt16w10r06	9	NIC20.1561	NIC20	Taiwan	16	6/01/15	6	19	194	535.781095	0.34325975	0.042885262	0.75959521	0.045698466	1
wormd20150601s3ED3092NIC20rt16w10r07	9	NIC20.1561	NIC20	Taiwan	16	6/01/15	7	18	226	372.637931	0.04288526	0.042885262	0.04569847	0.045698466	0
wormd20150601s3ED3092NIC20rt16w10r08	9	NIC20.1561	NIC20	Taiwan	16	6/01/15	8	17	223	584.63913	0.31369987	0.042885262	0.77623781	0.045698466	1
wormd20150601s3ED3092NIC20rt16w10r09	9	NIC20.1561	NIC20	Taiwan	16	6/01/15	9	16	192	536.507538	0.28364927	0.042885262	0.72141678	0.045698466	1
wormd20150601s3ED3092NIC20rt16w10r10	9	NIC20.1561	NIC20	Taiwan	16	6/01/15	10	15	144	481.173184	0.15289153	0.042885262	0.47296297	0.045698466	1
wormd20150601s3ED3092NIC20rt16w10r11	9	NIC20.1561	NIC20	Taiwan	16	6/01/15	11	14	123	470.503876	0.16488276	0.042885262	0.4394152	0.045698466	1
wormd20150601s3ED3092NIC20rt16w10r12	9	NIC20.1561	NIC20	Taiwan	16	6/01/15	12	13	212	529.958333	0.16093642	0.042885262	0.50077861	0.045698466	1
wormd20150601s3ED3092NIC20rt16w10r13	9	NIC20.1561	NIC20	Taiwan	16	6/01/15	13	12	293	559.7	0.08125494	0.042885262	0.11477192	0.045698466	0
wormd20150601s3ED3092NIC20rt16w10r14	9	NIC20.1561	NIC20	Taiwan	16	6/01/15	14	11	293	546.846667	0.08132894	0.042885262	0.09745158	0.045698466	0
wormd20150601s3ED3092NIC20rt16w10r15	9	NIC20.1561	NIC20	Taiwan	16	6/01/15	15	10	293	589.983333	0.07013302	0.042885262	0.07310752	0.045698466	0
wormd20150601s3ED3092NIC20rt16w11r00	10	NIC20.1562	NIC20	Taiwan	16	6/01/15	0	25	248	695.905923	0.43328695	0.061668621	0.56927162	0.069829368	1
wormd20150601s3ED3092NIC20rt16w11r01	10	NIC20.1562	NIC20	Taiwan	16	6/01/15	1	24	260	681.129252	0.44806237	0.061668621	0.47513327	0.069829368	1
wormd20150601s3ED3092NIC20rt16w11r02	10	NIC20.1562	NIC20	Taiwan	16	6/01/15	2	23	293	650.873333	0.41473828	0.061668621	0.61005796	0.069829368	1
wormd20150601s3ED3092NIC20rt16w11r03	10	NIC20.1562	NIC20	Taiwan	16	6/01/15	3	22	225	716.686347	0.36371592	0.061668621	0.61830806	0.069829368	1
wormd20150601s3ED3092NIC20rt16w11r04	10	NIC20.1562	NIC20	Taiwan	16	6/01/15	4	21	293	707.18	0.34998009	0.061668621	0.64850096	0.069829368	1
wormd20150601s3ED3092NIC20rt16w11r05	10	NIC20.1562	NIC20	Taiwan	16	6/01/15	5	20	159	681.394619	0.36377513	0.061668621	0.69804211	0.069829368	1
wormd20150601s3ED3092NIC20rt16w11r06	10	NIC20.1562	NIC20	Taiwan	16	6/01/15	6	19	204	676.06391	0.32876035	0.061668621	0.70942317	0.069829368	1
wormd20150601s3ED3092NIC20rt16w11r07	10	NIC20.1562	NIC20	Taiwan	16	6/01/15	7	18	284	688.47651	0.322961	0.061668621	0.76015744	0.069829368	1
wormd20150601s3ED3092NIC20rt16w11r09	10	NIC20.1562	NIC20	Taiwan	16	6/01/15	9	16	209	682.42471	0.28729346	0.061668621	0.75207196	0.069829368	1
wormd20150601s3ED3092NIC20rt16w11r10	10	NIC20.1562	NIC20	Taiwan	16	6/01/15	10	15	255	676.653979	0.27990726	0.061668621	0.76258358	0.069829368	1
wormd20150601s3ED3092NIC20rt16w11r11	10	NIC20.1562	NIC20	Taiwan	16	6/01/15	11	14	278	666.650685	0.20703953	0.061668621	0.63163363	0.069829368	1
wormd20150601s3ED3092NIC20rt16w11r12	10	NIC20.1562	NIC20	Taiwan	16	6/01/15	12	13	293	650.916667	0.09282848	0.061668621	0.16055009	0.069829368	1
wormd20150601s3ED3092NIC20rt16w11r13	10	NIC20.1562	NIC20	Taiwan	16	6/01/15	13	12	293	692.906667	0.09156586	0.061668621	0.16275132	0.069829368	1
wormd20150601s3ED3092NIC20rt16w11r14	10	NIC20.1562	NIC20	Taiwan	16	6/01/15	14	11	293	570.57	0.06166862	0.061668621	0.06982937	0.069829368	0
wormd20150601s3ED3092NIC20rt16w11r15	10	NIC20.1562	NIC20	Taiwan	16	6/01/15	15	10	293	700.856667	0.08501862	0.061668621	0.09034545	0.069829368	0
wormd20150601s3ED3092NIC20rt16w11r16	10	NIC20.1562	NIC20	Taiwan	16	6/01/15	16	9	270	564.577617	0.07259277	0.061668621	0.0745403	0.069829368	0
wormd20150601s3ED3092NIC20rt16w12r00	11	NIC20.1563	NIC20	Taiwan	16	6/01/15	0	25	293	541.206667	0.36326333	0.075877317	0.63957969	0.077733423	1
wormd20150601s3ED3092NIC20rt16w12r01	11	NIC20.1563	NIC20	Taiwan	16	6/01/15	1	24	293	605.503333	0.35240534	0.075877317	0.61898856	0.077733423	1
wormd20150601s3ED3092NIC20rt16w12r02	11	NIC20.1563	NIC20	Taiwan	16	6/01/15	2	23	293	546.52	0.35872241	0.075877317	0.69488368	0.077733423	1
wormd20150601s3ED3092NIC20rt16w12r03	11	NIC20.1563	NIC20	Taiwan	16	6/01/15	3	22	260	575.280899	0.37453349	0.075877317	0.66998958	0.077733423	1
wormd20150601s3ED3092NIC20rt16w12r04	11	NIC20.1563	NIC20	Taiwan	16	6/01/15	4	21	184	562.830688	0.35504199	0.075877317	0.72219054	0.077733423	1
wormd20150601s3ED3092NIC20rt16w12r05	11	NIC20.1563	NIC20	Taiwan	16	6/01/15	5	20	260	544.790262	0.3682199	0.075877317	0.75944231	0.077733423	1
wormd20150601s3ED3092NIC20rt16w12r06	11	NIC20.1563	NIC20	Taiwan	16	6/01/15	6	19	268	608.869091	0.32311606	0.075877317	0.72635671	0.077733423	1
wormd20150601s3ED3092NIC20rt16w12r07	11	NIC20.1563	NIC20	Taiwan	16	6/01/15	7	18	239	518.45122	0.38604901	0.075877317	0.79424326	0.077733423	1
wormd20150601s3ED3092NIC20rt16w12r08	11	NIC20.1563	NIC20	Taiwan	16	6/01/15	8	17	183	487.447368	0.34594009	0.075877317	0.77983566	0.077733423	1
wormd20150601s3ED3092NIC20rt16w12r09	11	NIC20.1563	NIC20	Taiwan	16	6/01/15	9	16	127	559.992366	0.30118411	0.075877317	0.75277386	0.077733423	1
wormd20150601s3ED3092NIC20rt16w12r10	11	NIC20.1563	NIC20	Taiwan	16	6/01/15	10	15	293	617.046667	0.24670717	0.075877317	0.69905829	0.077733423	1
wormd20150601s3ED3092NIC20rt16w12r11	11	NIC20.1563	NIC20	Taiwan	16	6/01/15	11	14	291	561.063758	0.13138359	0.075877317	0.38234253	0.077733423	1
wormd20150601s3ED3092NIC20rt16w12r12	11	NIC20.1563	NIC20	Taiwan	16	6/01/15	12	13	293	542.746667	0.09193824	0.075877317	0.13451153	0.077733423	0
wormd20150601s3ED3092NIC20rt16w12r13	11	NIC20.1563	NIC20	Taiwan	16	6/01/15	13	12	293	543.316667	0.09752991	0.075877317	0.12337	0.077733423	0
wormd20150601s3ED3092NIC20rt16w12r14	11	NIC20.1563	NIC20	Taiwan	16	6/01/15	14	11	293	499.92	0.08771612	0.075877317	0.11225214	0.077733423	0
wormd20150601s3ED3092NIC20rt16w12r15	11	NIC20.1563	NIC20	Taiwan	16	6/01/15	15	10	293	517.826667	0.09620818	0.075877317	0.10470783	0.077733423	0
wormd20150601s3ED3092NIC20rt16w12r16	11	NIC20.1563	NIC20	Taiwan	16	6/01/15	16	9	293	535.89	0.07587732	0.075877317	0.07773342	0.077733423	0
wormd20150601s3ED3092NIC20rt16w16r00	15	NIC20.1564	NIC20	Taiwan	16	6/01/15	0	25	285	492.243151	0.45883516	0.077824231	0.72157875	0.078072283	1
wormd20150601s3ED3092NIC20rt16w16r01	15	NIC20.1564	NIC20	Taiwan	16	6/01/15	1	24	287	511.034014	0.50701576	0.077824231	0.70158126	0.078072283	1
wormd20150601s3ED3092NIC20rt16w16r02	15	NIC20.1564	NIC20	Taiwan	16	6/01/15	2	23	288	526.027119	0.41671115	0.077824231	0.71386096	0.078072283	1
wormd20150601s3ED3092NIC20rt16w16r03	15	NIC20.1564	NIC20	Taiwan	16	6/01/15	3	22	286	516.417808	0.46442474	0.077824231	0.76591177	0.078072283	1
wormd20150601s3ED3092NIC20rt16w16r04	15	NIC20.1564	NIC20	Taiwan	16	6/01/15	4	21	255	539.19084	0.43420328	0.077824231	0.75594587	0.078072283	1
wormd20150601s3ED3092NIC20rt16w16r05	15	NIC20.1564	NIC20	Taiwan	16	6/01/15	5	20	289	521.861486	0.37912237	0.077824231	0.74777301	0.078072283	1
wormd20150601s3ED3092NIC20rt16w16r06	15	NIC20.1564	NIC20	Taiwan	16	6/01/15	6	19	270	517.371841	0.34939854	0.077824231	0.75693685	0.078072283	1
wormd20150601s3ED3092NIC20rt16w16r07	15	NIC20.1564	NIC20	Taiwan	16	6/01/15	7	18	253	549.45	0.36085	0.077824231	0.78070757	0.078072283	1
wormd20150601s3ED3092NIC20rt16w16r08	15	NIC20.1564	NIC20	Taiwan	16	6/01/15	8	17	293	534.166667	0.34536247	0.077824231	0.77837794	0.078072283	1
wormd20150601s3ED3092NIC20rt16w16r09	15	NIC20.1564	NIC20	Taiwan	16	6/01/15	9	16	290	504.23569	0.37938104	0.077824231	0.83294123	0.078072283	1
wormd20150601s3ED3092NIC20rt16w16r10	15	NIC20.1564	NIC20	Taiwan	16	6/01/15	10	15	136	501.517483	0.32268224	0.077824231	0.78940904	0.078072283	1
wormd20150601s3ED3092NIC20rt16w16r11	15	NIC20.1564	NIC20	Taiwan	16	6/01/15	11	14	284	506.865979	0.13642764	0.077824231	0.37607388	0.078072283	1
wormd20150601s3ED3092NIC20rt16w16r12	15	NIC20.1564	NIC20	Taiwan	16	6/01/15	12	13	293	593.85	0.10002654	0.077824231	0.13205395	0.078072283	0
wormd20150601s3ED3092NIC20rt16w16r13	15	NIC20.1564	NIC20	Taiwan	16	6/01/15	13	12	293	553.713333	0.10507487	0.077824231	0.13505469	0.078072283	0
wormd20150601s3ED3092NIC20rt16w16r14	15	NIC20.1564	NIC20	Taiwan	16	6/01/15	14	11	293	549.963333	0.09798934	0.077824231	0.11559132	0.078072283	0
wormd20150601s3ED3092NIC20rt16w16r15	15	NIC20.1564	NIC20	Taiwan	16	6/01/15	15	10	293	550	0.10328794	0.077824231	0.11134785	0.078072283	0
wormd20150601s3ED3092NIC20rt16w16r16	15	NIC20.1564	NIC20	Taiwan	16	6/01/15	16	9	226	474.008658	0.07782423	0.077824231	0.07807228	0.078072283	0
wormd20150601s3ED3092NIC20rt16w16r17	15	NIC20.1564	NIC20	Taiwan	16	6/01/15	17	8	272	488.910394	0.08108682	0.077824231	0.08105358	0.078072283	0
wormd20150601s3ED3092NIC20rt16w17r00	16	NIC20.1565	NIC20	Taiwan	16	6/01/15	0	25	293	605.12	0.32504924	0.083751602	0.70610188	0.084308031	1
wormd20150601s3ED3092NIC20rt16w17r02	16	NIC20.1565	NIC20	Taiwan	16	6/01/15	2	23	246	580.003876	0.36019777	0.083751602	0.70619922	0.084308031	1
wormd20150601s3ED3092NIC20rt16w17r03	16	NIC20.1565	NIC20	Taiwan	16	6/01/15	3	22	220	565.991453	0.3717841	0.083751602	0.73191971	0.084308031	1
wormd20150601s3ED3092NIC20rt16w17r04	16	NIC20.1565	NIC20	Taiwan	16	6/01/15	4	21	176	595.253807	0.32735602	0.083751602	0.73201835	0.084308031	1
wormd20150601s3ED3092NIC20rt16w17r06	16	NIC20.1565	NIC20	Taiwan	16	6/01/15	6	19	293	635.736667	0.30458533	0.083751602	0.75587498	0.084308031	1
wormd20150601s3ED3092NIC20rt16w17r07	16	NIC20.1565	NIC20	Taiwan	16	6/01/15	7	18	286	614.542662	0.32061	0.083751602	0.77399307	0.084308031	1
wormd20150601s3ED3092NIC20rt16w17r08	16	NIC20.1565	NIC20	Taiwan	16	6/01/15	8	17	169	492.661376	0.28367255	0.083751602	0.71097068	0.084308031	1
wormd20150601s3ED3092NIC20rt16w17r09	16	NIC20.1565	NIC20	Taiwan	16	6/01/15	9	16	148	480.219355	0.21194116	0.083751602	0.61832455	0.084308031	1
wormd20150601s3ED3092NIC20rt16w17r10	16	NIC20.1565	NIC20	Taiwan	16	6/01/15	10	15	293	603.05	0.24664697	0.083751602	0.7215739	0.084308031	1
wormd20150601s3ED3092NIC20rt16w17r12	16	NIC20.1565	NIC20	Taiwan	16	6/01/15	12	13	288	615.010135	0.13168191	0.083751602	0.31644258	0.084308031	1
wormd20150601s3ED3092NIC20rt16w17r13	16	NIC20.1565	NIC20	Taiwan	16	6/01/15	13	12	293	604.126667	0.10599603	0.083751602	0.17997769	0.084308031	1
wormd20150601s3ED3092NIC20rt16w17r14	16	NIC20.1565	NIC20	Taiwan	16	6/01/15	14	11	293	606.576667	0.09254814	0.083751602	0.11472812	0.084308031	0
wormd20150601s3ED3092NIC20rt16w17r15	16	NIC20.1565	NIC20	Taiwan	16	6/01/15	15	10	293	575.153333	0.10132904	0.083751602	0.111258	0.084308031	0
wormd20150601s3ED3092NIC20rt16w17r16	16	NIC20.1565	NIC20	Taiwan	16	6/01/15	16	9	293	572.043333	0.09943132	0.083751602	0.1001497	0.084308031	0
wormd20150601s3ED3092NIC20rt16w17r17	16	NIC20.1565	NIC20	Taiwan	16	6/01/15	17	8	293	567.283333	0.0837516	0.083751602	0.08430803	0.084308031	0
wormd20150601s3ED3092NIC20rt16w18r00	17	NIC20.1566	NIC20	Taiwan	16	6/01/15	0	25	293	514.336667	0.42141443	0.058956569	0.73326661	0.060175138	1
wormd20150601s3ED3092NIC20rt16w18r01	17	NIC20.1566	NIC20	Taiwan	16	6/01/15	1	24	278	486.115789	0.48954422	0.058956569	0.67227412	0.060175138	1
wormd20150601s3ED3092NIC20rt16w18r02	17	NIC20.1566	NIC20	Taiwan	16	6/01/15	2	23	134	510.77305	0.40929053	0.058956569	0.63701537	0.060175138	1
wormd20150601s3ED3092NIC20rt16w18r03	17	NIC20.1566	NIC20	Taiwan	16	6/01/15	3	22	281	504.086806	0.49365856	0.058956569	0.75442629	0.060175138	1
wormd20150601s3ED3092NIC20rt16w18r04	17	NIC20.1566	NIC20	Taiwan	16	6/01/15	4	21	122	506.915033	0.44034673	0.058956569	0.76614773	0.060175138	1
wormd20150601s3ED3092NIC20rt16w18r05	17	NIC20.1566	NIC20	Taiwan	16	6/01/15	5	20	252	494.899614	0.40491525	0.058956569	0.77305637	0.060175138	1
wormd20150601s3ED3092NIC20rt16w18r06	17	NIC20.1566	NIC20	Taiwan	16	6/01/15	6	19	256	497.961977	0.4062671	0.058956569	0.78228147	0.060175138	1
wormd20150601s3ED3092NIC20rt16w18r07	17	NIC20.1566	NIC20	Taiwan	16	6/01/15	7	18	285	505.369863	0.37945682	0.058956569	0.77240218	0.060175138	1
wormd20150601s3ED3092NIC20rt16w18r08	17	NIC20.1566	NIC20	Taiwan	16	6/01/15	8	17	278	493.701754	0.37312043	0.058956569	0.80084182	0.060175138	1
wormd20150601s3ED3092NIC20rt16w18r09	17	NIC20.1566	NIC20	Taiwan	16	6/01/15	9	16	290	483.942761	0.33400105	0.058956569	0.79900536	0.060175138	1
wormd20150601s3ED3092NIC20rt16w18r10	17	NIC20.1566	NIC20	Taiwan	16	6/01/15	10	15	148	470.380645	0.30428555	0.058956569	0.80710954	0.060175138	1
wormd20150601s3ED3092NIC20rt16w18r11	17	NIC20.1566	NIC20	Taiwan	16	6/01/15	11	14	290	535.777778	0.16100066	0.058956569	0.51064725	0.060175138	1
wormd20150601s3ED3092NIC20rt16w18r12	17	NIC20.1566	NIC20	Taiwan	16	6/01/15	12	13	293	490.876667	0.08025832	0.058956569	0.14215319	0.060175138	1
wormd20150601s3ED3092NIC20rt16w18r13	17	NIC20.1566	NIC20	Taiwan	16	6/01/15	13	12	293	484.26	0.07874665	0.058956569	0.13449903	0.060175138	0
wormd20150601s3ED3092NIC20rt16w18r14	17	NIC20.1566	NIC20	Taiwan	16	6/01/15	14	11	293	539.92	0.07387924	0.058956569	0.09188537	0.060175138	0
wormd20150601s3ED3092NIC20rt16w18r15	17	NIC20.1566	NIC20	Taiwan	16	6/01/15	15	10	293	508.34	0.06178464	0.058956569	0.0667062	0.060175138	0
wormd20150601s3ED3092NIC20rt16w18r16	17	NIC20.1566	NIC20	Taiwan	16	6/01/15	16	9	293	485.66	0.05895657	0.058956569	0.06017514	0.060175138	0
wormd20150601s3ED3092NIC20rt16w18r17	17	NIC20.1566	NIC20	Taiwan	16	6/01/15	17	8	293	541.523333	0.07515043	0.058956569	0.07380183	0.060175138	0
wormd20150602s114JU1338NIC20rt16w04r00	3	NIC20.1567	NIC20	Taiwan	16	6/02/15	0	25	263	644.518519	0.32392935	0.084855895	0.69178805	0.086777374	1
wormd20150602s114JU1338NIC20rt16w04r01	3	NIC20.1567	NIC20	Taiwan	16	6/02/15	1	24	282	616.297578	0.37105501	0.084855895	0.75011586	0.086777374	1
wormd20150602s114JU1338NIC20rt16w04r02	3	NIC20.1567	NIC20	Taiwan	16	6/02/15	2	23	293	635.956667	0.29291579	0.084855895	0.69693891	0.086777374	1
wormd20150602s114JU1338NIC20rt16w04r03	3	NIC20.1567	NIC20	Taiwan	16	6/02/15	3	22	199	670.39924	0.34640004	0.084855895	0.74371152	0.086777374	1
wormd20150602s114JU1338NIC20rt16w04r04	3	NIC20.1567	NIC20	Taiwan	16	6/02/15	4	21	293	597.1	0.38644765	0.084855895	0.79200858	0.086777374	1
wormd20150602s114JU1338NIC20rt16w04r05	3	NIC20.1567	NIC20	Taiwan	16	6/02/15	5	20	293	658.4	0.31134515	0.084855895	0.73367592	0.086777374	1
wormd20150602s114JU1338NIC20rt16w04r06	3	NIC20.1567	NIC20	Taiwan	16	6/02/15	6	19	293	616.866667	0.3304847	0.084855895	0.76633445	0.086777374	1
wormd20150602s114JU1338NIC20rt16w04r07	3	NIC20.1567	NIC20	Taiwan	16	6/02/15	7	18	237	614.202899	0.31593134	0.084855895	0.76646098	0.086777374	1
wormd20150602s114JU1338NIC20rt16w04r08	3	NIC20.1567	NIC20	Taiwan	16	6/02/15	8	17	274	676.162712	0.2965558	0.084855895	0.7566386	0.086777374	1
wormd20150602s114JU1338NIC20rt16w04r09	3	NIC20.1567	NIC20	Taiwan	16	6/02/15	9	16	293	618.65	0.17775555	0.084855895	0.52480257	0.086777374	1
wormd20150602s114JU1338NIC20rt16w04r10	3	NIC20.1567	NIC20	Taiwan	16	6/02/15	10	15	293	630.683333	0.23083328	0.084855895	0.73258949	0.086777374	1
wormd20150602s114JU1338NIC20rt16w04r11	3	NIC20.1567	NIC20	Taiwan	16	6/02/15	11	14	293	654.586667	0.16865849	0.084855895	0.55374714	0.086777374	1
wormd20150602s114JU1338NIC20rt16w04r12	3	NIC20.1567	NIC20	Taiwan	16	6/02/15	12	13	293	633.883333	0.12165476	0.084855895	0.27345471	0.086777374	1
wormd20150602s114JU1338NIC20rt16w04r13	3	NIC20.1567	NIC20	Taiwan	16	6/02/15	13	12	293	663.563333	0.10095332	0.084855895	0.13685654	0.086777374	0
wormd20150602s114JU1338NIC20rt16w04r14	3	NIC20.1567	NIC20	Taiwan	16	6/02/15	14	11	293	639.473333	0.11071962	0.084855895	0.133786	0.086777374	0
wormd20150602s114JU1338NIC20rt16w04r15	3	NIC20.1567	NIC20	Taiwan	16	6/02/15	15	10	293	641.806667	0.10691467	0.084855895	0.11203964	0.086777374	0
wormd20150602s114JU1338NIC20rt16w04r16	3	NIC20.1567	NIC20	Taiwan	16	6/02/15	16	9	293	614.513333	0.08485589	0.084855895	0.08677737	0.086777374	0
wormd20150602s114JU1338NIC20rt16w05r00	4	NIC20.1568	NIC20	Taiwan	16	6/02/15	0	25	225	546.413793	0.46674612	0.060937321	0.67724666	0.061212022	1
wormd20150602s114JU1338NIC20rt16w05r01	4	NIC20.1568	NIC20	Taiwan	16	6/02/15	1	24	288	528.298305	0.41856447	0.060937321	0.7270012	0.061212022	1
wormd20150602s114JU1338NIC20rt16w05r02	4	NIC20.1568	NIC20	Taiwan	16	6/02/15	2	23	293	561.026667	0.38525952	0.060937321	0.70912663	0.061212022	1
wormd20150602s114JU1338NIC20rt16w05r03	4	NIC20.1568	NIC20	Taiwan	16	6/02/15	3	22	293	532.04	0.38303742	0.060937321	0.73629991	0.061212022	1
wormd20150602s114JU1338NIC20rt16w05r04	4	NIC20.1568	NIC20	Taiwan	16	6/02/15	4	21	293	554.076667	0.34907632	0.060937321	0.72043857	0.061212022	1
wormd20150602s114JU1338NIC20rt16w05r05	4	NIC20.1568	NIC20	Taiwan	16	6/02/15	5	20	293	552.8	0.34350664	0.060937321	0.75616852	0.061212022	1
wormd20150602s114JU1338NIC20rt16w05r06	4	NIC20.1568	NIC20	Taiwan	16	6/02/15	6	19	270	517.945848	0.28340507	0.060937321	0.75589578	0.061212022	1
wormd20150602s114JU1338NIC20rt16w05r07	4	NIC20.1568	NIC20	Taiwan	16	6/02/15	7	18	256	506.422053	0.32068173	0.060937321	0.78162838	0.061212022	1
wormd20150602s114JU1338NIC20rt16w05r08	4	NIC20.1568	NIC20	Taiwan	16	6/02/15	8	17	250	473.821012	0.32569234	0.060937321	0.78685517	0.061212022	1
wormd20150602s114JU1338NIC20rt16w05r09	4	NIC20.1568	NIC20	Taiwan	16	6/02/15	9	16	274	519.213523	0.2311643	0.060937321	0.69619827	0.061212022	1
wormd20150602s114JU1338NIC20rt16w05r10	4	NIC20.1568	NIC20	Taiwan	16	6/02/15	10	15	162	451.847561	0.28284082	0.060937321	0.77625498	0.061212022	1
wormd20150602s114JU1338NIC20rt16w05r11	4	NIC20.1568	NIC20	Taiwan	16	6/02/15	11	14	235	482.409091	0.25708564	0.060937321	0.78285778	0.061212022	1
wormd20150602s114JU1338NIC20rt16w05r12	4	NIC20.1568	NIC20	Taiwan	16	6/02/15	12	13	293	480.613333	0.21130132	0.060937321	0.69674656	0.061212022	1
wormd20150602s114JU1338NIC20rt16w05r13	4	NIC20.1568	NIC20	Taiwan	16	6/02/15	13	12	293	525.133333	0.08524112	0.060937321	0.15068075	0.061212022	1
wormd20150602s114JU1338NIC20rt16w05r14	4	NIC20.1568	NIC20	Taiwan	16	6/02/15	14	11	293	533.896667	0.08285464	0.060937321	0.12930628	0.061212022	0
wormd20150602s114JU1338NIC20rt16w05r15	4	NIC20.1568	NIC20	Taiwan	16	6/02/15	15	10	293	549.676667	0.08143991	0.060937321	0.10464561	0.061212022	0
wormd20150602s114JU1338NIC20rt16w05r16	4	NIC20.1568	NIC20	Taiwan	16	6/02/15	16	9	293	535.716667	0.09016624	0.060937321	0.0941897	0.061212022	0
wormd20150602s114JU1338NIC20rt16w05r17	4	NIC20.1568	NIC20	Taiwan	16	6/02/15	17	8	293	528.346667	0.06093732	0.060937321	0.06121202	0.061212022	0
wormd20150602s114JU1338NIC20rt16w06r00	5	NIC20.1569	NIC20	Taiwan	16	6/02/15	0	25	293	559.566667	0.38195284	0.057847709	0.68172083	0.058008478	1
wormd20150602s114JU1338NIC20rt16w06r01	5	NIC20.1569	NIC20	Taiwan	16	6/02/15	1	24	293	584.803333	0.31576508	0.057847709	0.65072353	0.058008478	1
wormd20150602s114JU1338NIC20rt16w06r02	5	NIC20.1569	NIC20	Taiwan	16	6/02/15	2	23	290	524	0.38049982	0.057847709	0.69543531	0.058008478	1
wormd20150602s114JU1338NIC20rt16w06r03	5	NIC20.1569	NIC20	Taiwan	16	6/02/15	3	22	255	556.465649	0.31972785	0.057847709	0.72275005	0.058008478	1
wormd20150602s114JU1338NIC20rt16w06r05	5	NIC20.1569	NIC20	Taiwan	16	6/02/15	5	20	258	125.132075	0.20666431	0.057847709	0.2151031	0.058008478	1
wormd20150602s114JU1338NIC20rt16w06r06	5	NIC20.1569	NIC20	Taiwan	16	6/02/15	6	19	253	155.553846	0.14259032	0.057847709	0.13898013	0.058008478	0
wormd20150602s114JU1338NIC20rt16w06r07	5	NIC20.1569	NIC20	Taiwan	16	6/02/15	7	18	189	175.537313	0.11857433	0.057847709	0.11989478	0.058008478	0
wormd20150602s114JU1338NIC20rt16w06r09	5	NIC20.1569	NIC20	Taiwan	16	6/02/15	9	16	228	546.072961	0.26842649	0.057847709	0.75260671	0.058008478	1
wormd20150602s114JU1338NIC20rt16w06r10	5	NIC20.1569	NIC20	Taiwan	16	6/02/15	10	15	261	634.277027	0.19414865	0.057847709	0.58929474	0.058008478	1
wormd20150602s114JU1338NIC20rt16w06r11	5	NIC20.1569	NIC20	Taiwan	16	6/02/15	11	14	293	561.196667	0.19734074	0.057847709	0.64971359	0.058008478	1
wormd20150602s114JU1338NIC20rt16w06r12	5	NIC20.1569	NIC20	Taiwan	16	6/02/15	12	13	293	554.83	0.11868672	0.057847709	0.25102923	0.058008478	1
wormd20150602s114JU1338NIC20rt16w06r13	5	NIC20.1569	NIC20	Taiwan	16	6/02/15	13	12	152	705.735135	0.09640868	0.057847709	0.23460295	0.058008478	1
wormd20150602s114JU1338NIC20rt16w06r14	5	NIC20.1569	NIC20	Taiwan	16	6/02/15	14	11	111	304.25	0.06761523	0.057847709	0.06995753	0.058008478	0
wormd20150602s114JU1338NIC20rt16w06r15	5	NIC20.1569	NIC20	Taiwan	16	6/02/15	15	10	279	604.055944	0.07649397	0.057847709	0.08293288	0.058008478	0
wormd20150602s114JU1338NIC20rt16w06r16	5	NIC20.1569	NIC20	Taiwan	16	6/02/15	16	9	101	354.184466	0.06182376	0.057847709	0.06182572	0.058008478	0
wormd20150602s114JU1338NIC20rt16w06r17	5	NIC20.1569	NIC20	Taiwan	16	6/02/15	17	8	100	343.518868	0.05784771	0.057847709	0.05800848	0.058008478	0
wormd20150602s114JU1338NIC20rt16w10r00	9	NIC20.1570	NIC20	Taiwan	16	6/02/15	0	25	221	631.210714	0.37302526	0.067575462	0.80052731	0.069549784	1
wormd20150602s114JU1338NIC20rt16w10r01	9	NIC20.1570	NIC20	Taiwan	16	6/02/15	1	24	293	613.183333	0.34036282	0.067575462	0.77001662	0.069549784	1
wormd20150602s114JU1338NIC20rt16w10r02	9	NIC20.1570	NIC20	Taiwan	16	6/02/15	2	23	290	580.737374	0.39382926	0.067575462	0.82127166	0.069549784	1
wormd20150602s114JU1338NIC20rt16w10r03	9	NIC20.1570	NIC20	Taiwan	16	6/02/15	3	22	249	628.378906	0.32122039	0.067575462	0.77604784	0.069549784	1
wormd20150602s114JU1338NIC20rt16w10r04	9	NIC20.1570	NIC20	Taiwan	16	6/02/15	4	21	181	650.108434	0.26080918	0.067575462	0.73664952	0.069549784	1
wormd20150602s114JU1338NIC20rt16w10r05	9	NIC20.1570	NIC20	Taiwan	16	6/02/15	5	20	218	625.900398	0.27888529	0.067575462	0.74513876	0.069549784	1
wormd20150602s114JU1338NIC20rt16w10r06	9	NIC20.1570	NIC20	Taiwan	16	6/02/15	6	19	122	598.437908	0.26523537	0.067575462	0.75510506	0.069549784	1
wormd20150602s114JU1338NIC20rt16w10r07	9	NIC20.1570	NIC20	Taiwan	16	6/02/15	7	18	229	583.855319	0.2978104	0.067575462	0.78943879	0.069549784	1
wormd20150602s114JU1338NIC20rt16w10r09	9	NIC20.1570	NIC20	Taiwan	16	6/02/15	9	16	234	654.828571	0.18139377	0.067575462	0.57203421	0.069549784	1
wormd20150602s114JU1338NIC20rt16w10r10	9	NIC20.1570	NIC20	Taiwan	16	6/02/15	10	15	265	590.726962	0.16944106	0.067575462	0.54240471	0.069549784	1
wormd20150602s114JU1338NIC20rt16w10r12	9	NIC20.1570	NIC20	Taiwan	16	6/02/15	12	13	266	564.754579	0.11619441	0.067575462	0.33430588	0.069549784	1
wormd20150602s114JU1338NIC20rt16w10r13	9	NIC20.1570	NIC20	Taiwan	16	6/02/15	13	12	102	558.076923	0.13314623	0.067575462	0.46707175	0.069549784	1
wormd20150602s114JU1338NIC20rt16w10r14	9	NIC20.1570	NIC20	Taiwan	16	6/02/15	14	11	209	618.342593	0.0850581	0.067575462	0.13090626	0.069549784	0
wormd20150602s114JU1338NIC20rt16w10r15	9	NIC20.1570	NIC20	Taiwan	16	6/02/15	15	10	152	578.668831	0.07510779	0.067575462	0.09189443	0.069549784	0
wormd20150602s114JU1338NIC20rt16w10r16	9	NIC20.1570	NIC20	Taiwan	16	6/02/15	16	9	293	582.946667	0.06915297	0.067575462	0.07274064	0.069549784	0
wormd20150602s114JU1338NIC20rt16w10r17	9	NIC20.1570	NIC20	Taiwan	16	6/02/15	17	8	293	580.343333	0.06757546	0.067575462	0.06954978	0.069549784	0
wormd20150602s114JU1338NIC20rt16w11r00	10	NIC20.1571	NIC20	Taiwan	16	6/02/15	0	25	263	455.451852	0.50261489	0.12200161	0.66504989	0.131699686	1
wormd20150602s114JU1338NIC20rt16w11r01	10	NIC20.1571	NIC20	Taiwan	16	6/02/15	1	24	226	470.562232	0.50438811	0.12200161	0.62273358	0.131699686	1
wormd20150602s114JU1338NIC20rt16w11r02	10	NIC20.1571	NIC20	Taiwan	16	6/02/15	2	23	203	467.985646	0.39685723	0.12200161	0.73716688	0.131699686	1
wormd20150602s114JU1338NIC20rt16w11r05	10	NIC20.1571	NIC20	Taiwan	16	6/02/15	5	20	146	271.926174	0.23387633	0.12200161	0.3213361	0.131699686	1
wormd20150602s114JU1338NIC20rt16w11r06	10	NIC20.1571	NIC20	Taiwan	16	6/02/15	6	19	239	331.873984	0.18398321	0.12200161	0.2064332	0.131699686	1
wormd20150602s114JU1338NIC20rt16w11r07	10	NIC20.1571	NIC20	Taiwan	16	6/02/15	7	18	257	388.102273	0.15765149	0.12200161	0.16270193	0.131699686	1
wormd20150602s114JU1338NIC20rt16w11r08	10	NIC20.1571	NIC20	Taiwan	16	6/02/15	8	17	239	430.943089	0.14286145	0.12200161	0.14947185	0.131699686	1
wormd20150602s114JU1338NIC20rt16w11r09	10	NIC20.1571	NIC20	Taiwan	16	6/02/15	9	16	223	465.768559	0.13405312	0.12200161	0.13960845	0.131699686	0
wormd20150602s114JU1338NIC20rt16w11r10	10	NIC20.1571	NIC20	Taiwan	16	6/02/15	10	15	242	491.630081	0.12521686	0.12200161	0.13169969	0.131699686	0
wormd20150602s114JU1338NIC20rt16w11r11	10	NIC20.1571	NIC20	Taiwan	16	6/02/15	11	14	187	543.709845	0.13947862	0.12200161	0.16748798	0.131699686	1
wormd20150602s114JU1338NIC20rt16w11r12	10	NIC20.1571	NIC20	Taiwan	16	6/02/15	12	13	148	566.900662	0.14552822	0.12200161	0.16849007	0.131699686	1
wormd20150602s114JU1338NIC20rt16w11r13	10	NIC20.1571	NIC20	Taiwan	16	6/02/15	13	12	158	614.668712	0.1499259	0.12200161	0.19443566	0.131699686	1
wormd20150602s114JU1338NIC20rt16w11r14	10	NIC20.1571	NIC20	Taiwan	16	6/02/15	14	11	163	673.159091	0.14721759	0.12200161	0.18907306	0.131699686	1
wormd20150602s114JU1338NIC20rt16w11r15	10	NIC20.1571	NIC20	Taiwan	16	6/02/15	15	10	203	711.373913	0.12353106	0.12200161	0.15534874	0.131699686	1
wormd20150602s114JU1338NIC20rt16w11r16	10	NIC20.1571	NIC20	Taiwan	16	6/02/15	16	9	181	727.272727	0.12200161	0.12200161	0.13379684	0.131699686	0
wormd20150602s114JU1338NIC20rt16w12r00	11	NIC20.1572	NIC20	Taiwan	16	6/02/15	0	25	293	568.59	0.30817757	0.070500465	0.6955105	0.077278451	1
wormd20150602s114JU1338NIC20rt16w12r01	11	NIC20.1572	NIC20	Taiwan	16	6/02/15	1	24	240	668.975524	0.34813793	0.070500465	0.77564416	0.077278451	1
wormd20150602s114JU1338NIC20rt16w12r02	11	NIC20.1572	NIC20	Taiwan	16	6/02/15	2	23	260	645.55477	0.36397803	0.070500465	0.76789837	0.077278451	1
wormd20150602s114JU1338NIC20rt16w12r03	11	NIC20.1572	NIC20	Taiwan	16	6/02/15	3	22	177	681.49789	0.34899802	0.070500465	0.78378678	0.077278451	1
wormd20150602s114JU1338NIC20rt16w12r04	11	NIC20.1572	NIC20	Taiwan	16	6/02/15	4	21	285	635.003344	0.3460362	0.070500465	0.78083061	0.077278451	1
wormd20150602s114JU1338NIC20rt16w12r05	11	NIC20.1572	NIC20	Taiwan	16	6/02/15	5	20	293	575.246667	0.35639591	0.070500465	0.79847143	0.077278451	1
wormd20150602s114JU1338NIC20rt16w12r06	11	NIC20.1572	NIC20	Taiwan	16	6/02/15	6	19	159	707.751073	0.29977858	0.070500465	0.75687165	0.077278451	1
wormd20150602s114JU1338NIC20rt16w12r08	11	NIC20.1572	NIC20	Taiwan	16	6/02/15	8	17	141	709.733607	0.23710874	0.070500465	0.68863989	0.077278451	1
wormd20150602s114JU1338NIC20rt16w12r09	11	NIC20.1572	NIC20	Taiwan	16	6/02/15	9	16	137	683.109005	0.24678296	0.070500465	0.74681811	0.077278451	1
wormd20150602s114JU1338NIC20rt16w12r10	11	NIC20.1572	NIC20	Taiwan	16	6/02/15	10	15	281	646.524306	0.24795523	0.070500465	0.74721418	0.077278451	1
wormd20150602s114JU1338NIC20rt16w12r11	11	NIC20.1572	NIC20	Taiwan	16	6/02/15	11	14	290	569.589226	0.20625992	0.070500465	0.65285215	0.077278451	1
wormd20150602s114JU1338NIC20rt16w12r12	11	NIC20.1572	NIC20	Taiwan	16	6/02/15	12	13	293	599.06	0.18108	0.070500465	0.59347432	0.077278451	1
wormd20150602s114JU1338NIC20rt16w12r13	11	NIC20.1572	NIC20	Taiwan	16	6/02/15	13	12	293	614.956667	0.13222809	0.070500465	0.4154977	0.077278451	1
wormd20150602s114JU1338NIC20rt16w12r14	11	NIC20.1572	NIC20	Taiwan	16	6/02/15	14	11	293	545.386667	0.09237616	0.070500465	0.1440853	0.077278451	1
wormd20150602s114JU1338NIC20rt16w12r15	11	NIC20.1572	NIC20	Taiwan	16	6/02/15	15	10	293	614.293333	0.09104743	0.070500465	0.10609765	0.077278451	0
wormd20150602s114JU1338NIC20rt16w12r16	11	NIC20.1572	NIC20	Taiwan	16	6/02/15	16	9	293	568.84	0.07050046	0.070500465	0.07727845	0.077278451	0
wormd20150602s114JU1338NIC20rt16w12r17	11	NIC20.1572	NIC20	Taiwan	16	6/02/15	17	8	293	613.976667	0.0795864	0.070500465	0.07976331	0.077278451	0
wormd20150602s114JU1338NIC20rt16w16r00	15	NIC20.1573	NIC20	Taiwan	16	6/02/15	0	25	221	506.053097	0.4698017	0.070697938	0.75036545	0.071199954	1
wormd20150602s114JU1338NIC20rt16w16r01	15	NIC20.1573	NIC20	Taiwan	16	6/02/15	1	24	284	514.793814	0.46028	0.070697938	0.76276086	0.071199954	1
wormd20150602s114JU1338NIC20rt16w16r02	15	NIC20.1573	NIC20	Taiwan	16	6/02/15	2	23	173	502.7	0.43115266	0.070697938	0.72558464	0.071199954	1
wormd20150602s114JU1338NIC20rt16w16r03	15	NIC20.1573	NIC20	Taiwan	16	6/02/15	3	22	197	515.24	0.40823222	0.070697938	0.76176211	0.071199954	1
wormd20150602s114JU1338NIC20rt16w16r04	15	NIC20.1573	NIC20	Taiwan	16	6/02/15	4	21	281	517.361111	0.41553586	0.070697938	0.78492677	0.071199954	1
wormd20150602s114JU1338NIC20rt16w16r05	15	NIC20.1573	NIC20	Taiwan	16	6/02/15	5	20	228	524.519313	0.3942156	0.070697938	0.78219497	0.071199954	1
wormd20150602s114JU1338NIC20rt16w16r06	15	NIC20.1573	NIC20	Taiwan	16	6/02/15	6	19	273	460.985714	0.3431663	0.070697938	0.72888602	0.071199954	1
wormd20150602s114JU1338NIC20rt16w16r07	15	NIC20.1573	NIC20	Taiwan	16	6/02/15	7	18	293	528.676667	0.35763555	0.070697938	0.78179479	0.071199954	1
wormd20150602s114JU1338NIC20rt16w16r08	15	NIC20.1573	NIC20	Taiwan	16	6/02/15	8	17	130	479.532847	0.34976094	0.070697938	0.79234885	0.071199954	1
wormd20150602s114JU1338NIC20rt16w16r11	15	NIC20.1573	NIC20	Taiwan	16	6/02/15	11	14	150	476	0.23982034	0.070697938	0.76066789	0.071199954	1
wormd20150602s114JU1338NIC20rt16w16r12	15	NIC20.1573	NIC20	Taiwan	16	6/02/15	12	13	164	471.925287	0.19691221	0.070697938	0.6728085	0.071199954	1
wormd20150602s114JU1338NIC20rt16w16r13	15	NIC20.1573	NIC20	Taiwan	16	6/02/15	13	12	293	522.723333	0.15131765	0.070697938	0.46424535	0.071199954	1
wormd20150602s114JU1338NIC20rt16w16r14	15	NIC20.1573	NIC20	Taiwan	16	6/02/15	14	11	221	498.266667	0.10729119	0.070697938	0.18521476	0.071199954	1
wormd20150602s114JU1338NIC20rt16w16r15	15	NIC20.1573	NIC20	Taiwan	16	6/02/15	15	10	293	524.186667	0.09678181	0.070697938	0.10540373	0.071199954	0
wormd20150602s114JU1338NIC20rt16w16r16	15	NIC20.1573	NIC20	Taiwan	16	6/02/15	16	9	293	529.426667	0.09992698	0.070697938	0.10482286	0.071199954	0
wormd20150602s114JU1338NIC20rt16w16r17	15	NIC20.1573	NIC20	Taiwan	16	6/02/15	17	8	293	494.796667	0.07069794	0.070697938	0.07119995	0.071199954	0
wormd20150602s114JU1338NIC20rt16w17r00	16	NIC20.1574	NIC20	Taiwan	16	6/02/15	0	25	280	527.864111	0.40901324	0.089542051	0.77389061	0.105705423	1
wormd20150602s114JU1338NIC20rt16w17r01	16	NIC20.1574	NIC20	Taiwan	16	6/02/15	1	24	281	543.211806	0.40862888	0.089542051	0.75881913	0.105705423	1
wormd20150602s114JU1338NIC20rt16w17r02	16	NIC20.1574	NIC20	Taiwan	16	6/02/15	2	23	277	536.919014	0.39565206	0.089542051	0.77162534	0.105705423	1
wormd20150602s114JU1338NIC20rt16w17r03	16	NIC20.1574	NIC20	Taiwan	16	6/02/15	3	22	293	463.866667	0.43323518	0.089542051	0.78072221	0.105705423	1
wormd20150602s114JU1338NIC20rt16w17r04	16	NIC20.1574	NIC20	Taiwan	16	6/02/15	4	21	287	567.836735	0.38073614	0.089542051	0.76693511	0.105705423	1
wormd20150602s114JU1338NIC20rt16w17r05	16	NIC20.1574	NIC20	Taiwan	16	6/02/15	5	20	293	556.206667	0.39679208	0.089542051	0.78152536	0.105705423	1
wormd20150602s114JU1338NIC20rt16w17r06	16	NIC20.1574	NIC20	Taiwan	16	6/02/15	6	19	204	481.578947	0.40026981	0.089542051	0.78359427	0.105705423	1
wormd20150602s114JU1338NIC20rt16w17r07	16	NIC20.1574	NIC20	Taiwan	16	6/02/15	7	18	210	465.815668	0.30789511	0.089542051	0.72824128	0.105705423	1
wormd20150602s114JU1338NIC20rt16w17r08	16	NIC20.1574	NIC20	Taiwan	16	6/02/15	8	17	194	485.850746	0.35308224	0.089542051	0.79043924	0.105705423	1
wormd20150602s114JU1338NIC20rt16w17r10	16	NIC20.1574	NIC20	Taiwan	16	6/02/15	10	15	261	552.825758	0.21079113	0.089542051	0.62796849	0.105705423	1
wormd20150602s114JU1338NIC20rt16w17r11	16	NIC20.1574	NIC20	Taiwan	16	6/02/15	11	14	276	556.24735	0.17535358	0.089542051	0.50086285	0.105705423	1
wormd20150602s114JU1338NIC20rt16w17r12	16	NIC20.1574	NIC20	Taiwan	16	6/02/15	12	13	293	578.413333	0.10904231	0.089542051	0.28254473	0.105705423	1
wormd20150602s114JU1338NIC20rt16w17r13	16	NIC20.1574	NIC20	Taiwan	16	6/02/15	13	12	293	576.373333	0.11130532	0.089542051	0.26032699	0.105705423	1
wormd20150602s114JU1338NIC20rt16w17r14	16	NIC20.1574	NIC20	Taiwan	16	6/02/15	14	11	293	585.743333	0.09001185	0.089542051	0.13745513	0.105705423	0
wormd20150602s114JU1338NIC20rt16w17r15	16	NIC20.1574	NIC20	Taiwan	16	6/02/15	15	10	279	532.828671	0.08954205	0.089542051	0.10570542	0.105705423	0
wormd20150602s114JU1338NIC20rt16w17r17	16	NIC20.1574	NIC20	Taiwan	16	6/02/15	17	8	293	514.73	0.10826995	0.089542051	0.11176826	0.105705423	0
wormd20150602s114JU1338NIC20rt16w18r00	17	NIC20.1575	NIC20	Taiwan	16	6/02/15	0	25	186	685.755906	0.38357236	0.065610818	0.57584591	0.065932814	1
wormd20150602s114JU1338NIC20rt16w18r01	17	NIC20.1575	NIC20	Taiwan	16	6/02/15	1	24	204	639.766784	0.40616168	0.065610818	0.53186275	0.065932814	1
wormd20150602s114JU1338NIC20rt16w18r02	17	NIC20.1575	NIC20	Taiwan	16	6/02/15	2	23	173	679.579365	0.37768835	0.065610818	0.61411688	0.065932814	1
wormd20150602s114JU1338NIC20rt16w18r03	17	NIC20.1575	NIC20	Taiwan	16	6/02/15	3	22	182	686.378788	0.3770681	0.065610818	0.67350296	0.065932814	1
wormd20150602s114JU1338NIC20rt16w18r04	17	NIC20.1575	NIC20	Taiwan	16	6/02/15	4	21	115	720.887179	0.31677338	0.065610818	0.57175781	0.065932814	1
wormd20150602s114JU1338NIC20rt16w18r06	17	NIC20.1575	NIC20	Taiwan	16	6/02/15	6	19	260	129.146067	0.20427533	0.065610818	0.20743623	0.065932814	1
wormd20150602s114JU1338NIC20rt16w18r07	17	NIC20.1575	NIC20	Taiwan	16	6/02/15	7	18	284	155.443299	0.18762754	0.065610818	0.1982218	0.065932814	1
wormd20150602s114JU1338NIC20rt16w18r08	17	NIC20.1575	NIC20	Taiwan	16	6/02/15	8	17	284	180.996622	0.16865519	0.065610818	0.18184675	0.065932814	1
wormd20150602s114JU1338NIC20rt16w18r09	17	NIC20.1575	NIC20	Taiwan	16	6/02/15	9	16	289	214.625	0.17270417	0.065610818	0.1776837	0.065932814	1
wormd20150602s114JU1338NIC20rt16w18r10	17	NIC20.1575	NIC20	Taiwan	16	6/02/15	10	15	284	252.405498	0.14768422	0.065610818	0.15043278	0.065932814	1
wormd20150602s114JU1338NIC20rt16w18r11	17	NIC20.1575	NIC20	Taiwan	16	6/02/15	11	14	262	284.342007	0.12469457	0.065610818	0.12662059	0.065932814	0
wormd20150602s114JU1338NIC20rt16w18r12	17	NIC20.1575	NIC20	Taiwan	16	6/02/15	12	13	261	307.936567	0.10502042	0.065610818	0.10881481	0.065932814	0
wormd20150602s114JU1338NIC20rt16w18r13	17	NIC20.1575	NIC20	Taiwan	16	6/02/15	13	12	166	328.312139	0.09654973	0.065610818	0.0996088	0.065932814	0
wormd20150602s114JU1338NIC20rt16w18r16	17	NIC20.1575	NIC20	Taiwan	16	6/02/15	16	9	109	399.294643	0.06561082	0.065610818	0.06593281	0.065932814	0
wormd20150602s114JU1338NIC20rt16w18r17	17	NIC20.1575	NIC20	Taiwan	16	6/02/15	17	8	147	397.953642	0.06979993	0.065610818	0.07333922	0.065932814	0
wormd20150602s29NIC20NIC65rt16w01r00	0	NIC20.1576	NIC20	Taiwan	16	6/02/15	0	25	281	588.107744	0.41609252	0.047634988	0.63093044	0.048174424	1
wormd20150602s29NIC20NIC65rt16w01r01	0	NIC20.1576	NIC20	Taiwan	16	6/02/15	1	24	119	714.898936	0.32445177	0.047634988	0.51490623	0.048174424	1
wormd20150602s29NIC20NIC65rt16w01r02	0	NIC20.1576	NIC20	Taiwan	16	6/02/15	2	23	253	649.628472	0.34737643	0.047634988	0.54838745	0.048174424	1
wormd20150602s29NIC20NIC65rt16w01r03	0	NIC20.1576	NIC20	Taiwan	16	6/02/15	3	22	101	727.434555	0.33763487	0.047634988	0.53741399	0.048174424	1
wormd20150602s29NIC20NIC65rt16w01r05	0	NIC20.1576	NIC20	Taiwan	16	6/02/15	5	20	254	606.310861	0.38247186	0.047634988	0.68510783	0.048174424	1
wormd20150602s29NIC20NIC65rt16w01r06	0	NIC20.1576	NIC20	Taiwan	16	6/02/15	6	19	224	569.29386	0.35898658	0.047634988	0.76424071	0.048174424	1
wormd20150602s29NIC20NIC65rt16w01r07	0	NIC20.1576	NIC20	Taiwan	16	6/02/15	7	18	194	649.879828	0.32896896	0.047634988	0.70237816	0.048174424	1
wormd20150602s29NIC20NIC65rt16w01r08	0	NIC20.1576	NIC20	Taiwan	16	6/02/15	8	17	272	567.996454	0.34868316	0.047634988	0.75838185	0.048174424	1
wormd20150602s29NIC20NIC65rt16w01r09	0	NIC20.1576	NIC20	Taiwan	16	6/02/15	9	16	162	697.573913	0.19348838	0.047634988	0.56525512	0.048174424	1
wormd20150602s29NIC20NIC65rt16w01r11	0	NIC20.1576	NIC20	Taiwan	16	6/02/15	11	14	170	577.508475	0.24615668	0.047634988	0.7004588	0.048174424	1
wormd20150602s29NIC20NIC65rt16w01r12	0	NIC20.1576	NIC20	Taiwan	16	6/02/15	12	13	148	701.208163	0.14856635	0.047634988	0.4611188	0.048174424	1
wormd20150602s29NIC20NIC65rt16w01r13	0	NIC20.1576	NIC20	Taiwan	16	6/02/15	13	12	171	707.411504	0.10065607	0.047634988	0.16987198	0.048174424	1
wormd20150602s29NIC20NIC65rt16w01r15	0	NIC20.1576	NIC20	Taiwan	16	6/02/15	15	10	173	745.380282	0.05033105	0.047634988	0.05502176	0.048174424	0
wormd20150602s29NIC20NIC65rt16w01r16	0	NIC20.1576	NIC20	Taiwan	16	6/02/15	16	9	293	596.933333	0.04763499	0.047634988	0.04817442	0.048174424	0
wormd20150602s29NIC20NIC65rt16w01r17	0	NIC20.1576	NIC20	Taiwan	16	6/02/15	17	8	293	605.986667	0.05000559	0.047634988	0.04980424	0.048174424	0
wormd20150602s29NIC20NIC65rt16w02r00	2	NIC20.1577	NIC20	Taiwan	16	6/02/15	0	25	293	475.816667	0.41266724	0.080198291	0.69759006	0.080212827	1
wormd20150602s29NIC20NIC65rt16w02r01	2	NIC20.1577	NIC20	Taiwan	16	6/02/15	1	24	293	494.173333	0.43664591	0.080198291	0.72011269	0.080212827	1
wormd20150602s29NIC20NIC65rt16w02r02	2	NIC20.1577	NIC20	Taiwan	16	6/02/15	2	23	293	513.02	0.37622886	0.080198291	0.68240705	0.080212827	1
wormd20150602s29NIC20NIC65rt16w02r03	2	NIC20.1577	NIC20	Taiwan	16	6/02/15	3	22	293	524.01	0.40177622	0.080198291	0.73267178	0.080212827	1
wormd20150602s29NIC20NIC65rt16w02r04	2	NIC20.1577	NIC20	Taiwan	16	6/02/15	4	21	288	458.023729	0.41573854	0.080198291	0.79919179	0.080212827	1
wormd20150602s29NIC20NIC65rt16w02r05	2	NIC20.1577	NIC20	Taiwan	16	6/02/15	5	20	240	480.35102	0.38363778	0.080198291	0.79148215	0.080212827	1
wormd20150602s29NIC20NIC65rt16w02r06	2	NIC20.1577	NIC20	Taiwan	16	6/02/15	6	19	293	522.2	0.32627549	0.080198291	0.75215005	0.080212827	1
wormd20150602s29NIC20NIC65rt16w02r07	2	NIC20.1577	NIC20	Taiwan	16	6/02/15	7	18	293	430.376667	0.36344213	0.080198291	0.80308345	0.080212827	1
wormd20150602s29NIC20NIC65rt16w02r08	2	NIC20.1577	NIC20	Taiwan	16	6/02/15	8	17	292	522.692308	0.28836612	0.080198291	0.75209645	0.080212827	1
wormd20150602s29NIC20NIC65rt16w02r09	2	NIC20.1577	NIC20	Taiwan	16	6/02/15	9	16	293	484.56	0.27384325	0.080198291	0.78700281	0.080212827	1
wormd20150602s29NIC20NIC65rt16w02r10	2	NIC20.1577	NIC20	Taiwan	16	6/02/15	10	15	293	492.583333	0.26057031	0.080198291	0.76633519	0.080212827	1
wormd20150602s29NIC20NIC65rt16w02r11	2	NIC20.1577	NIC20	Taiwan	16	6/02/15	11	14	293	473.226667	0.22434593	0.080198291	0.73737459	0.080212827	1
wormd20150602s29NIC20NIC65rt16w02r12	2	NIC20.1577	NIC20	Taiwan	16	6/02/15	12	13	271	456.528777	0.13038945	0.080198291	0.40191288	0.080212827	1
wormd20150602s29NIC20NIC65rt16w02r13	2	NIC20.1577	NIC20	Taiwan	16	6/02/15	13	12	239	439.073171	0.11300259	0.080198291	0.30657684	0.080212827	1
wormd20150602s29NIC20NIC65rt16w02r14	2	NIC20.1577	NIC20	Taiwan	16	6/02/15	14	11	290	463.808081	0.09663503	0.080198291	0.16656893	0.080212827	1
wormd20150602s29NIC20NIC65rt16w02r15	2	NIC20.1577	NIC20	Taiwan	16	6/02/15	15	10	293	465.576667	0.0832165	0.080198291	0.08740858	0.080212827	0
wormd20150602s29NIC20NIC65rt16w02r16	2	NIC20.1577	NIC20	Taiwan	16	6/02/15	16	9	293	487.223333	0.08039898	0.080198291	0.08239666	0.080212827	0
wormd20150602s29NIC20NIC65rt16w02r17	2	NIC20.1577	NIC20	Taiwan	16	6/02/15	17	8	293	515.82	0.08019829	0.080198291	0.08021283	0.080212827	0
wormd20150602s29NIC20NIC65rt16w06r00	6	NIC20.1578	NIC20	Taiwan	16	6/02/15	0	25	261	545.652985	0.44150268	0.04085534	0.62779252	0.042214864	1
wormd20150602s29NIC20NIC65rt16w06r01	6	NIC20.1578	NIC20	Taiwan	16	6/02/15	1	24	293	563	0.42553475	0.04085534	0.66089695	0.042214864	1
wormd20150602s29NIC20NIC65rt16w06r02	6	NIC20.1578	NIC20	Taiwan	16	6/02/15	2	23	270	602.105634	0.43723299	0.04085534	0.62973787	0.042214864	1
wormd20150602s29NIC20NIC65rt16w06r03	6	NIC20.1578	NIC20	Taiwan	16	6/02/15	3	22	285	587.478261	0.41330287	0.04085534	0.61409909	0.042214864	1
wormd20150602s29NIC20NIC65rt16w06r04	6	NIC20.1578	NIC20	Taiwan	16	6/02/15	4	21	247	605.171642	0.38360109	0.04085534	0.66875241	0.042214864	1
wormd20150602s29NIC20NIC65rt16w06r05	6	NIC20.1578	NIC20	Taiwan	16	6/02/15	5	20	252	554.841085	0.41462384	0.04085534	0.75227869	0.042214864	1
wormd20150602s29NIC20NIC65rt16w06r06	6	NIC20.1578	NIC20	Taiwan	16	6/02/15	6	19	284	563.477663	0.30937271	0.04085534	0.6824511	0.042214864	1
wormd20150602s29NIC20NIC65rt16w06r07	6	NIC20.1578	NIC20	Taiwan	16	6/02/15	7	18	280	570.560976	0.36866167	0.04085534	0.75668507	0.042214864	1
wormd20150602s29NIC20NIC65rt16w06r08	6	NIC20.1578	NIC20	Taiwan	16	6/02/15	8	17	244	524.959839	0.3442239	0.04085534	0.7629698	0.042214864	1
wormd20150602s29NIC20NIC65rt16w06r09	6	NIC20.1578	NIC20	Taiwan	16	6/02/15	9	16	265	540.488971	0.25910099	0.04085534	0.66532999	0.042214864	1
wormd20150602s29NIC20NIC65rt16w06r10	6	NIC20.1578	NIC20	Taiwan	16	6/02/15	10	15	269	569.413919	0.25580057	0.04085534	0.7148848	0.042214864	1
wormd20150602s29NIC20NIC65rt16w06r11	6	NIC20.1578	NIC20	Taiwan	16	6/02/15	11	14	234	563.165975	0.1766652	0.04085534	0.51659205	0.042214864	1
wormd20150602s29NIC20NIC65rt16w06r12	6	NIC20.1578	NIC20	Taiwan	16	6/02/15	12	13	283	554.101399	0.1758989	0.04085534	0.55256338	0.042214864	1
wormd20150602s29NIC20NIC65rt16w06r13	6	NIC20.1578	NIC20	Taiwan	16	6/02/15	13	12	293	668.293333	0.09841149	0.04085534	0.20940185	0.042214864	1
wormd20150602s29NIC20NIC65rt16w06r14	6	NIC20.1578	NIC20	Taiwan	16	6/02/15	14	11	293	638.623333	0.08848714	0.04085534	0.1299628	0.042214864	0
wormd20150602s29NIC20NIC65rt16w06r15	6	NIC20.1578	NIC20	Taiwan	16	6/02/15	15	10	293	664.58	0.05050615	0.04085534	0.05651925	0.042214864	0
wormd20150602s29NIC20NIC65rt16w06r16	6	NIC20.1578	NIC20	Taiwan	16	6/02/15	16	9	293	651.826667	0.04085534	0.04085534	0.04221486	0.042214864	0
wormd20150602s29NIC20NIC65rt16w06r17	6	NIC20.1578	NIC20	Taiwan	16	6/02/15	17	8	293	708.783333	0.05603543	0.04085534	0.05624703	0.042214864	0
wormd20150602s29NIC20NIC65rt16w07r00	7	NIC20.1579	NIC20	Taiwan	16	6/02/15	0	25	293	530.51	0.42627348	0.086721088	0.70664462	0.099031589	1
wormd20150602s29NIC20NIC65rt16w07r01	7	NIC20.1579	NIC20	Taiwan	16	6/02/15	1	24	293	564.323333	0.31729815	0.086721088	0.71654249	0.099031589	1
wormd20150602s29NIC20NIC65rt16w07r02	7	NIC20.1579	NIC20	Taiwan	16	6/02/15	2	23	290	537.811448	0.35201184	0.086721088	0.74727838	0.099031589	1
wormd20150602s29NIC20NIC65rt16w07r03	7	NIC20.1579	NIC20	Taiwan	16	6/02/15	3	22	249	508.789063	0.40936549	0.086721088	0.75636099	0.099031589	1
wormd20150602s29NIC20NIC65rt16w07r04	7	NIC20.1579	NIC20	Taiwan	16	6/02/15	4	21	246	535.52988	0.35455183	0.086721088	0.74664146	0.099031589	1
wormd20150602s29NIC20NIC65rt16w07r05	7	NIC20.1579	NIC20	Taiwan	16	6/02/15	5	20	199	510.896226	0.33955525	0.086721088	0.7417227	0.099031589	1
wormd20150602s29NIC20NIC65rt16w07r06	7	NIC20.1579	NIC20	Taiwan	16	6/02/15	6	19	159	520.484848	0.35742612	0.086721088	0.7607386	0.099031589	1
wormd20150602s29NIC20NIC65rt16w07r07	7	NIC20.1579	NIC20	Taiwan	16	6/02/15	7	18	148	483.36	0.35671339	0.086721088	0.77814366	0.099031589	1
wormd20150602s29NIC20NIC65rt16w07r08	7	NIC20.1579	NIC20	Taiwan	16	6/02/15	8	17	238	572.493878	0.22326761	0.086721088	0.57698532	0.099031589	1
wormd20150602s29NIC20NIC65rt16w07r09	7	NIC20.1579	NIC20	Taiwan	16	6/02/15	9	16	293	561.833333	0.28434546	0.086721088	0.78259722	0.099031589	1
wormd20150602s29NIC20NIC65rt16w07r12	7	NIC20.1579	NIC20	Taiwan	16	6/02/15	12	13	282	523.647059	0.2259201	0.086721088	0.73891864	0.099031589	1
wormd20150602s29NIC20NIC65rt16w07r13	7	NIC20.1579	NIC20	Taiwan	16	6/02/15	13	12	293	504.55	0.14039557	0.086721088	0.37213594	0.099031589	1
wormd20150602s29NIC20NIC65rt16w07r14	7	NIC20.1579	NIC20	Taiwan	16	6/02/15	14	11	283	554.348276	0.12225612	0.086721088	0.15270774	0.099031589	1
wormd20150602s29NIC20NIC65rt16w07r15	7	NIC20.1579	NIC20	Taiwan	16	6/02/15	15	10	101	402.790476	0.08672109	0.086721088	0.09903159	0.099031589	0
wormd20150602s29NIC20NIC65rt16w07r16	7	NIC20.1579	NIC20	Taiwan	16	6/02/15	16	9	230	544.139241	0.1110763	0.086721088	0.11339809	0.099031589	0
wormd20150602s29NIC20NIC65rt16w08r00	8	NIC20.1580	NIC20	Taiwan	16	6/02/15	0	25	293	614.293333	0.39514029	0.075497017	0.72088419	0.076064811	1
wormd20150602s29NIC20NIC65rt16w08r01	8	NIC20.1580	NIC20	Taiwan	16	6/02/15	1	24	293	629.366667	0.36253465	0.075497017	0.76266039	0.076064811	1
wormd20150602s29NIC20NIC65rt16w08r02	8	NIC20.1580	NIC20	Taiwan	16	6/02/15	2	23	279	645.472028	0.29958336	0.075497017	0.72481469	0.076064811	1
wormd20150602s29NIC20NIC65rt16w08r03	8	NIC20.1580	NIC20	Taiwan	16	6/02/15	3	22	285	602.010274	0.36963299	0.075497017	0.76473753	0.076064811	1
wormd20150602s29NIC20NIC65rt16w08r04	8	NIC20.1580	NIC20	Taiwan	16	6/02/15	4	21	269	616.586957	0.35987027	0.075497017	0.77511424	0.076064811	1
wormd20150602s29NIC20NIC65rt16w08r05	8	NIC20.1580	NIC20	Taiwan	16	6/02/15	5	20	179	602.492537	0.35913415	0.075497017	0.77168599	0.076064811	1
wormd20150602s29NIC20NIC65rt16w08r06	8	NIC20.1580	NIC20	Taiwan	16	6/02/15	6	19	241	614.113208	0.2952576	0.075497017	0.69977786	0.076064811	1
wormd20150602s29NIC20NIC65rt16w08r07	8	NIC20.1580	NIC20	Taiwan	16	6/02/15	7	18	171	598.344444	0.3644462	0.075497017	0.80607129	0.076064811	1
wormd20150602s29NIC20NIC65rt16w08r08	8	NIC20.1580	NIC20	Taiwan	16	6/02/15	8	17	204	639.539823	0.35695478	0.075497017	0.80556586	0.076064811	1
wormd20150602s29NIC20NIC65rt16w08r09	8	NIC20.1580	NIC20	Taiwan	16	6/02/15	9	16	245	617.281746	0.20070522	0.075497017	0.58107965	0.076064811	1
wormd20150602s29NIC20NIC65rt16w08r10	8	NIC20.1580	NIC20	Taiwan	16	6/02/15	10	15	136	362.514286	0.18885401	0.075497017	0.42176149	0.076064811	1
wormd20150602s29NIC20NIC65rt16w08r11	8	NIC20.1580	NIC20	Taiwan	16	6/02/15	11	14	151	546.184713	0.25656976	0.075497017	0.75602877	0.076064811	1
wormd20150602s29NIC20NIC65rt16w08r12	8	NIC20.1580	NIC20	Taiwan	16	6/02/15	12	13	219	574.252212	0.10181423	0.075497017	0.21253542	0.076064811	1
wormd20150602s29NIC20NIC65rt16w08r13	8	NIC20.1580	NIC20	Taiwan	16	6/02/15	13	12	293	585.496667	0.11103113	0.075497017	0.21814521	0.076064811	1
wormd20150602s29NIC20NIC65rt16w08r14	8	NIC20.1580	NIC20	Taiwan	16	6/02/15	14	11	293	603.91	0.09998516	0.075497017	0.12427364	0.076064811	0
wormd20150602s29NIC20NIC65rt16w08r15	8	NIC20.1580	NIC20	Taiwan	16	6/02/15	15	10	293	584.643333	0.09059927	0.075497017	0.10623429	0.076064811	0
wormd20150602s29NIC20NIC65rt16w08r16	8	NIC20.1580	NIC20	Taiwan	16	6/02/15	16	9	293	562.223333	0.08019376	0.075497017	0.08303127	0.076064811	0
wormd20150602s29NIC20NIC65rt16w08r17	8	NIC20.1580	NIC20	Taiwan	16	6/02/15	17	8	278	563.85614	0.07549702	0.075497017	0.07606481	0.076064811	0
wormd20150602s29NIC20NIC65rt16w12r00	12	NIC20.1581	NIC20	Taiwan	16	6/02/15	0	25	291	536.510067	0.39552718	0.052531612	0.75015509	0.052676235	1
wormd20150602s29NIC20NIC65rt16w12r01	12	NIC20.1581	NIC20	Taiwan	16	6/02/15	1	24	290	589.026936	0.33907874	0.052531612	0.67932002	0.052676235	1
wormd20150602s29NIC20NIC65rt16w12r02	12	NIC20.1581	NIC20	Taiwan	16	6/02/15	2	23	293	541.306667	0.39683545	0.052531612	0.71761343	0.052676235	1
wormd20150602s29NIC20NIC65rt16w12r03	12	NIC20.1581	NIC20	Taiwan	16	6/02/15	3	22	293	518.636667	0.39485158	0.052531612	0.74206584	0.052676235	1
wormd20150602s29NIC20NIC65rt16w12r04	12	NIC20.1581	NIC20	Taiwan	16	6/02/15	4	21	293	564.39	0.41935675	0.052531612	0.74513866	0.052676235	1
wormd20150602s29NIC20NIC65rt16w12r05	12	NIC20.1581	NIC20	Taiwan	16	6/02/15	5	20	291	555.348993	0.38179873	0.052531612	0.7414515	0.052676235	1
wormd20150602s29NIC20NIC65rt16w12r06	12	NIC20.1581	NIC20	Taiwan	16	6/02/15	6	19	293	515.626667	0.3931095	0.052531612	0.81203532	0.052676235	1
wormd20150602s29NIC20NIC65rt16w12r07	12	NIC20.1581	NIC20	Taiwan	16	6/02/15	7	18	275	507.060714	0.37034577	0.052531612	0.79358543	0.052676235	1
wormd20150602s29NIC20NIC65rt16w12r08	12	NIC20.1581	NIC20	Taiwan	16	6/02/15	8	17	293	542.5	0.34558369	0.052531612	0.78662443	0.052676235	1
wormd20150602s29NIC20NIC65rt16w12r09	12	NIC20.1581	NIC20	Taiwan	16	6/02/15	9	16	119	433.652893	0.34989791	0.052531612	0.78065639	0.052676235	1
wormd20150602s29NIC20NIC65rt16w12r10	12	NIC20.1581	NIC20	Taiwan	16	6/02/15	10	15	271	572.924658	0.26571007	0.052531612	0.7361517	0.052676235	1
wormd20150602s29NIC20NIC65rt16w12r11	12	NIC20.1581	NIC20	Taiwan	16	6/02/15	11	14	266	617.197761	0.19870539	0.052531612	0.67886175	0.052676235	1
wormd20150602s29NIC20NIC65rt16w12r12	12	NIC20.1581	NIC20	Taiwan	16	6/02/15	12	13	249	478.257813	0.18410684	0.052531612	0.53745911	0.052676235	1
wormd20150602s29NIC20NIC65rt16w12r13	12	NIC20.1581	NIC20	Taiwan	16	6/02/15	13	12	293	560.666667	0.09140543	0.052531612	0.16779357	0.052676235	1
wormd20150602s29NIC20NIC65rt16w12r14	12	NIC20.1581	NIC20	Taiwan	16	6/02/15	14	11	285	671.120401	0.08665456	0.052531612	0.16335552	0.052676235	1
wormd20150602s29NIC20NIC65rt16w12r15	12	NIC20.1581	NIC20	Taiwan	16	6/02/15	15	10	293	669.72	0.06280305	0.052531612	0.06941358	0.052676235	0
wormd20150602s29NIC20NIC65rt16w12r16	12	NIC20.1581	NIC20	Taiwan	16	6/02/15	16	9	293	649.213333	0.05333258	0.052531612	0.05721425	0.052676235	0
wormd20150602s29NIC20NIC65rt16w12r17	12	NIC20.1581	NIC20	Taiwan	16	6/02/15	17	8	293	623.933333	0.05253161	0.052531612	0.05267623	0.052676235	0
wormd20150602s29NIC20NIC65rt16w13r00	13	NIC20.1582	NIC20	Taiwan	16	6/02/15	0	25	267	552.357664	0.42149085	0.054239602	0.69407429	0.056738399	1
wormd20150602s29NIC20NIC65rt16w13r01	13	NIC20.1582	NIC20	Taiwan	16	6/02/15	1	24	291	529.618243	0.42656414	0.054239602	0.76256354	0.056738399	1
wormd20150602s29NIC20NIC65rt16w13r02	13	NIC20.1582	NIC20	Taiwan	16	6/02/15	2	23	271	512.848921	0.46184953	0.054239602	0.7174014	0.056738399	1
wormd20150602s29NIC20NIC65rt16w13r03	13	NIC20.1582	NIC20	Taiwan	16	6/02/15	3	22	293	486.343333	0.44456869	0.054239602	0.8021943	0.056738399	1
wormd20150602s29NIC20NIC65rt16w13r04	13	NIC20.1582	NIC20	Taiwan	16	6/02/15	4	21	293	550.973333	0.4399458	0.054239602	0.72521991	0.056738399	1
wormd20150602s29NIC20NIC65rt16w13r05	13	NIC20.1582	NIC20	Taiwan	16	6/02/15	5	20	274	519.886121	0.41700527	0.054239602	0.79785106	0.056738399	1
wormd20150602s29NIC20NIC65rt16w13r06	13	NIC20.1582	NIC20	Taiwan	16	6/02/15	6	19	290	519.444444	0.42138114	0.054239602	0.78941799	0.056738399	1
wormd20150602s29NIC20NIC65rt16w13r07	13	NIC20.1582	NIC20	Taiwan	16	6/02/15	7	18	234	524.651452	0.40615808	0.054239602	0.80206619	0.056738399	1
wormd20150602s29NIC20NIC65rt16w13r08	13	NIC20.1582	NIC20	Taiwan	16	6/02/15	8	17	293	535.17	0.23751883	0.054239602	0.60683037	0.056738399	1
wormd20150602s29NIC20NIC65rt16w13r09	13	NIC20.1582	NIC20	Taiwan	16	6/02/15	9	16	290	563.525253	0.13927912	0.054239602	0.35437691	0.056738399	1
wormd20150602s29NIC20NIC65rt16w13r10	13	NIC20.1582	NIC20	Taiwan	16	6/02/15	10	15	189	497.056122	0.34345661	0.054239602	0.80706643	0.056738399	1
wormd20150602s29NIC20NIC65rt16w13r11	13	NIC20.1582	NIC20	Taiwan	16	6/02/15	11	14	285	544.452055	0.2278647	0.054239602	0.68297926	0.056738399	1
wormd20150602s29NIC20NIC65rt16w13r12	13	NIC20.1582	NIC20	Taiwan	16	6/02/15	12	13	239	531.890688	0.144812	0.054239602	0.46386895	0.056738399	1
wormd20150602s29NIC20NIC65rt16w13r13	13	NIC20.1582	NIC20	Taiwan	16	6/02/15	13	12	293	646.743333	0.09596601	0.054239602	0.20822075	0.056738399	1
wormd20150602s29NIC20NIC65rt16w13r14	13	NIC20.1582	NIC20	Taiwan	16	6/02/15	14	11	286	568.030717	0.10573448	0.054239602	0.15531186	0.056738399	1
wormd20150602s29NIC20NIC65rt16w13r15	13	NIC20.1582	NIC20	Taiwan	16	6/02/15	15	10	293	556.11	0.06037098	0.054239602	0.06782591	0.056738399	0
wormd20150602s29NIC20NIC65rt16w13r16	13	NIC20.1582	NIC20	Taiwan	16	6/02/15	16	9	293	554.74	0.0542396	0.054239602	0.05791014	0.056738399	0
wormd20150602s29NIC20NIC65rt16w13r17	13	NIC20.1582	NIC20	Taiwan	16	6/02/15	17	8	293	555.71	0.05655505	0.054239602	0.0567384	0.056738399	0
wormd20150602s29NIC20NIC65rt16w14r00	14	NIC20.1583	NIC20	Taiwan	16	6/02/15	0	25	292	549.638796	0.42650075	0.085607443	0.81150472	0.112226478	1
wormd20150602s29NIC20NIC65rt16w14r01	14	NIC20.1583	NIC20	Taiwan	16	6/02/15	1	24	293	523.143333	0.43461834	0.085607443	0.82414489	0.112226478	1
wormd20150602s29NIC20NIC65rt16w14r02	14	NIC20.1583	NIC20	Taiwan	16	6/02/15	2	23	293	532.436667	0.41649646	0.085607443	0.80721248	0.112226478	1
wormd20150602s29NIC20NIC65rt16w14r03	14	NIC20.1583	NIC20	Taiwan	16	6/02/15	3	22	293	539.726667	0.41120901	0.085607443	0.82482786	0.112226478	1
wormd20150602s29NIC20NIC65rt16w14r04	14	NIC20.1583	NIC20	Taiwan	16	6/02/15	4	21	293	519.906667	0.41855796	0.085607443	0.82798889	0.112226478	1
wormd20150602s29NIC20NIC65rt16w14r05	14	NIC20.1583	NIC20	Taiwan	16	6/02/15	5	20	293	526.116667	0.399272	0.085607443	0.8074224	0.112226478	1
wormd20150602s29NIC20NIC65rt16w14r06	14	NIC20.1583	NIC20	Taiwan	16	6/02/15	6	19	293	546.253333	0.37646759	0.085607443	0.81606095	0.112226478	1
wormd20150602s29NIC20NIC65rt16w14r07	14	NIC20.1583	NIC20	Taiwan	16	6/02/15	7	18	293	496.643333	0.24933238	0.085607443	0.70418457	0.112226478	1
wormd20150602s29NIC20NIC65rt16w14r08	14	NIC20.1583	NIC20	Taiwan	16	6/02/15	8	17	229	528.217949	0.34020028	0.085607443	0.80189313	0.112226478	1
wormd20150602s29NIC20NIC65rt16w14r09	14	NIC20.1583	NIC20	Taiwan	16	6/02/15	9	16	166	538.930636	0.31605867	0.085607443	0.80323128	0.112226478	1
wormd20150602s29NIC20NIC65rt16w14r10	14	NIC20.1583	NIC20	Taiwan	16	6/02/15	10	15	293	570.97	0.19149088	0.085607443	0.61019444	0.112226478	1
wormd20150602s29NIC20NIC65rt16w14r11	14	NIC20.1583	NIC20	Taiwan	16	6/02/15	11	14	290	521.670034	0.14713931	0.085607443	0.41182939	0.112226478	1
wormd20150602s29NIC20NIC65rt16w14r12	14	NIC20.1583	NIC20	Taiwan	16	6/02/15	12	13	288	538.105085	0.18790486	0.085607443	0.6123858	0.112226478	1
wormd20150602s29NIC20NIC65rt16w14r13	14	NIC20.1583	NIC20	Taiwan	16	6/02/15	13	12	256	556.781609	0.10541465	0.085607443	0.25069724	0.112226478	1
wormd20150602s29NIC20NIC65rt16w14r14	14	NIC20.1583	NIC20	Taiwan	16	6/02/15	14	11	108	553.357143	0.08560744	0.085607443	0.11222648	0.112226478	0
wormd20150602s29NIC20NIC65rt16w14r16	14	NIC20.1583	NIC20	Taiwan	16	6/02/15	16	9	134	135.416058	0.10778449	0.085607443	0.11530943	0.112226478	0
wormd20150603s28NIC20QR24rt16w01r00	0	NIC20.1593	NIC20	Taiwan	16	6/03/15	0	25	122	109.753968	0.25650021	0.076556542	0.31278934	0.080721843	1
wormd20150603s28NIC20QR24rt16w01r02	0	NIC20.1593	NIC20	Taiwan	16	6/03/15	2	23	120	500.696	0.30621309	0.076556542	0.75112512	0.080721843	1
wormd20150603s28NIC20QR24rt16w01r03	0	NIC20.1593	NIC20	Taiwan	16	6/03/15	3	22	206	629.745455	0.29258109	0.076556542	0.68418834	0.080721843	1
wormd20150603s28NIC20QR24rt16w01r04	0	NIC20.1593	NIC20	Taiwan	16	6/03/15	4	21	265	650.479021	0.26370004	0.076556542	0.6602194	0.080721843	1
wormd20150603s28NIC20QR24rt16w01r05	0	NIC20.1593	NIC20	Taiwan	16	6/03/15	5	20	170	669.967568	0.19124642	0.076556542	0.58422245	0.080721843	1
wormd20150603s28NIC20QR24rt16w01r06	0	NIC20.1593	NIC20	Taiwan	16	6/03/15	6	19	101	563.778846	0.20429545	0.076556542	0.63074003	0.080721843	1
wormd20150603s28NIC20QR24rt16w01r07	0	NIC20.1593	NIC20	Taiwan	16	6/03/15	7	18	189	601.222707	0.25516616	0.076556542	0.70621782	0.080721843	1
wormd20150603s28NIC20QR24rt16w01r10	0	NIC20.1593	NIC20	Taiwan	16	6/03/15	10	15	153	489.707006	0.17769961	0.076556542	0.5457167	0.080721843	1
wormd20150603s28NIC20QR24rt16w01r11	0	NIC20.1593	NIC20	Taiwan	16	6/03/15	11	14	268	525.836364	0.10504919	0.076556542	0.28659665	0.080721843	1
wormd20150603s28NIC20QR24rt16w01r12	0	NIC20.1593	NIC20	Taiwan	16	6/03/15	12	13	293	659.646667	0.08013595	0.076556542	0.1538083	0.080721843	1
wormd20150603s28NIC20QR24rt16w01r13	0	NIC20.1593	NIC20	Taiwan	16	6/03/15	13	12	293	509.67	0.07655654	0.076556542	0.09795321	0.080721843	0
wormd20150603s28NIC20QR24rt16w01r14	0	NIC20.1593	NIC20	Taiwan	16	6/03/15	14	11	293	592.083333	0.07907632	0.076556542	0.08681432	0.080721843	0
wormd20150603s28NIC20QR24rt16w01r15	0	NIC20.1593	NIC20	Taiwan	16	6/03/15	15	10	293	584.676667	0.08038889	0.076556542	0.08584058	0.080721843	0
wormd20150603s28NIC20QR24rt16w01r16	0	NIC20.1593	NIC20	Taiwan	16	6/03/15	16	9	293	582.586667	0.08066282	0.076556542	0.08072184	0.080721843	0
wormd20150603s28NIC20QR24rt16w01r17	0	NIC20.1593	NIC20	Taiwan	16	6/03/15	17	8	293	625.366667	0.08023503	0.076556542	0.08110525	0.080721843	0
wormd20150603s28NIC20QR24rt16w02r00	1	NIC20.1594	NIC20	Taiwan	16	6/03/15	0	25	173	616.738889	0.30332782	0.078535409	0.69967596	0.081177714	1
wormd20150603s28NIC20QR24rt16w02r01	1	NIC20.1594	NIC20	Taiwan	16	6/03/15	1	24	196	648.323404	0.31737213	0.078535409	0.66425041	0.081177714	1
wormd20150603s28NIC20QR24rt16w02r03	1	NIC20.1594	NIC20	Taiwan	16	6/03/15	3	22	133	590.235294	0.28946598	0.078535409	0.66001037	0.081177714	1
wormd20150603s28NIC20QR24rt16w02r04	1	NIC20.1594	NIC20	Taiwan	16	6/03/15	4	21	182	677.461905	0.23246879	0.078535409	0.62358346	0.081177714	1
wormd20150603s28NIC20QR24rt16w02r05	1	NIC20.1594	NIC20	Taiwan	16	6/03/15	5	20	127	549.742424	0.2701144	0.078535409	0.62883125	0.081177714	1
wormd20150603s28NIC20QR24rt16w02r06	1	NIC20.1594	NIC20	Taiwan	16	6/03/15	6	19	148	653.4	0.23528637	0.078535409	0.62435441	0.081177714	1
wormd20150603s28NIC20QR24rt16w02r07	1	NIC20.1594	NIC20	Taiwan	16	6/03/15	7	18	224	629.978355	0.25351888	0.078535409	0.67570024	0.081177714	1
wormd20150603s28NIC20QR24rt16w02r08	1	NIC20.1594	NIC20	Taiwan	16	6/03/15	8	17	262	657.842697	0.24542628	0.078535409	0.71261035	0.081177714	1
wormd20150603s28NIC20QR24rt16w02r09	1	NIC20.1594	NIC20	Taiwan	16	6/03/15	9	16	240	666.255061	0.2118368	0.078535409	0.57982924	0.081177714	1
wormd20150603s28NIC20QR24rt16w02r10	1	NIC20.1594	NIC20	Taiwan	16	6/03/15	10	15	293	626.47	0.2005602	0.078535409	0.63986509	0.081177714	1
wormd20150603s28NIC20QR24rt16w02r11	1	NIC20.1594	NIC20	Taiwan	16	6/03/15	11	14	246	579.142292	0.16339122	0.078535409	0.53618504	0.081177714	1
wormd20150603s28NIC20QR24rt16w02r12	1	NIC20.1594	NIC20	Taiwan	16	6/03/15	12	13	126	447.549618	0.08874166	0.078535409	0.1517726	0.081177714	1
wormd20150603s28NIC20QR24rt16w02r13	1	NIC20.1594	NIC20	Taiwan	16	6/03/15	13	12	142	353.148649	0.08568244	0.078535409	0.09090848	0.081177714	0
wormd20150603s28NIC20QR24rt16w02r14	1	NIC20.1594	NIC20	Taiwan	16	6/03/15	14	11	165	373.986547	0.0839042	0.078535409	0.08861708	0.081177714	0
wormd20150603s28NIC20QR24rt16w02r15	1	NIC20.1594	NIC20	Taiwan	16	6/03/15	15	10	140	403.958621	0.07853541	0.078535409	0.08117771	0.081177714	0
wormd20150603s28NIC20QR24rt16w02r16	1	NIC20.1594	NIC20	Taiwan	16	6/03/15	16	9	143	439.260274	0.08816666	0.078535409	0.08833656	0.081177714	0
wormd20150603s28NIC20QR24rt16w02r17	1	NIC20.1594	NIC20	Taiwan	16	6/03/15	17	8	246	444.083665	0.09322227	0.078535409	0.0937783	0.081177714	0
wormd20150603s28NIC20QR24rt16w03r00	2	NIC20.1595	NIC20	Taiwan	16	6/03/15	0	25	180	542.918919	0.37989764	0.090957972	0.69102994	0.091040966	1
wormd20150603s28NIC20QR24rt16w03r01	2	NIC20.1595	NIC20	Taiwan	16	6/03/15	1	24	248	584.583333	0.30541933	0.090957972	0.72533725	0.091040966	1
wormd20150603s28NIC20QR24rt16w03r02	2	NIC20.1595	NIC20	Taiwan	16	6/03/15	2	23	289	616.861486	0.27742531	0.090957972	0.69391374	0.091040966	1
wormd20150603s28NIC20QR24rt16w03r05	2	NIC20.1595	NIC20	Taiwan	16	6/03/15	5	20	258	571.732075	0.15008304	0.090957972	0.44373632	0.091040966	1
wormd20150603s28NIC20QR24rt16w03r06	2	NIC20.1595	NIC20	Taiwan	16	6/03/15	6	19	290	567.430976	0.29711758	0.090957972	0.70232011	0.091040966	1
wormd20150603s28NIC20QR24rt16w03r07	2	NIC20.1595	NIC20	Taiwan	16	6/03/15	7	18	285	607.441781	0.20185872	0.090957972	0.54667094	0.091040966	1
wormd20150603s28NIC20QR24rt16w03r08	2	NIC20.1595	NIC20	Taiwan	16	6/03/15	8	17	267	584.788889	0.27118665	0.090957972	0.72391141	0.091040966	1
wormd20150603s28NIC20QR24rt16w03r09	2	NIC20.1595	NIC20	Taiwan	16	6/03/15	9	16	195	568.690355	0.18704439	0.090957972	0.56077263	0.091040966	1
wormd20150603s28NIC20QR24rt16w03r10	2	NIC20.1595	NIC20	Taiwan	16	6/03/15	10	15	222	538.162996	0.11625545	0.090957972	0.30626091	0.091040966	1
wormd20150603s28NIC20QR24rt16w03r11	2	NIC20.1595	NIC20	Taiwan	16	6/03/15	11	14	293	593.7	0.13793012	0.090957972	0.40604255	0.091040966	1
wormd20150603s28NIC20QR24rt16w03r12	2	NIC20.1595	NIC20	Taiwan	16	6/03/15	12	13	293	632.883333	0.10480818	0.090957972	0.18627158	0.091040966	1
wormd20150603s28NIC20QR24rt16w03r13	2	NIC20.1595	NIC20	Taiwan	16	6/03/15	13	12	290	636.545455	0.09423706	0.090957972	0.11811413	0.091040966	0
wormd20150603s28NIC20QR24rt16w03r14	2	NIC20.1595	NIC20	Taiwan	16	6/03/15	14	11	293	614.166667	0.09834964	0.090957972	0.10675053	0.091040966	0
wormd20150603s28NIC20QR24rt16w03r15	2	NIC20.1595	NIC20	Taiwan	16	6/03/15	15	10	293	627.75	0.10248369	0.090957972	0.10429352	0.091040966	0
wormd20150603s28NIC20QR24rt16w03r16	2	NIC20.1595	NIC20	Taiwan	16	6/03/15	16	9	293	651.236667	0.09388948	0.090957972	0.0938071	0.091040966	0
wormd20150603s28NIC20QR24rt16w03r17	2	NIC20.1595	NIC20	Taiwan	16	6/03/15	17	8	293	652.806667	0.09095797	0.090957972	0.09104097	0.091040966	0
wormd20150603s28NIC20QR24rt16w07r00	6	NIC20.1596	NIC20	Taiwan	16	6/03/15	0	25	284	647.88255	0.41160501	0.059631626	0.6440511	0.060333104	1
wormd20150603s28NIC20QR24rt16w07r01	6	NIC20.1596	NIC20	Taiwan	16	6/03/15	1	24	241	613.274194	0.40296635	0.059631626	0.6972281	0.060333104	1
wormd20150603s28NIC20QR24rt16w07r04	6	NIC20.1596	NIC20	Taiwan	16	6/03/15	4	21	159	627.43125	0.37421123	0.059631626	0.67284281	0.060333104	1
wormd20150603s28NIC20QR24rt16w07r05	6	NIC20.1596	NIC20	Taiwan	16	6/03/15	5	20	239	620.96	0.38876347	0.059631626	0.72778361	0.060333104	1
wormd20150603s28NIC20QR24rt16w07r06	6	NIC20.1596	NIC20	Taiwan	16	6/03/15	6	19	265	635.522059	0.3126909	0.059631626	0.68428675	0.060333104	1
wormd20150603s28NIC20QR24rt16w07r07	6	NIC20.1596	NIC20	Taiwan	16	6/03/15	7	18	105	584.225225	0.34140536	0.059631626	0.67257194	0.060333104	1
wormd20150603s28NIC20QR24rt16w07r08	6	NIC20.1596	NIC20	Taiwan	16	6/03/15	8	17	270	595.364621	0.32331524	0.059631626	0.73576967	0.060333104	1
wormd20150603s28NIC20QR24rt16w07r10	6	NIC20.1596	NIC20	Taiwan	16	6/03/15	10	15	194	640.262443	0.26873146	0.059631626	0.73471769	0.060333104	1
wormd20150603s28NIC20QR24rt16w07r11	6	NIC20.1596	NIC20	Taiwan	16	6/03/15	11	14	283	673.661074	0.16977143	0.059631626	0.53310425	0.060333104	1
wormd20150603s28NIC20QR24rt16w07r12	6	NIC20.1596	NIC20	Taiwan	16	6/03/15	12	13	293	654.463333	0.09729849	0.059631626	0.14706059	0.060333104	1
wormd20150603s28NIC20QR24rt16w07r13	6	NIC20.1596	NIC20	Taiwan	16	6/03/15	13	12	293	734.726667	0.10384354	0.059631626	0.13127564	0.060333104	0
wormd20150603s28NIC20QR24rt16w07r14	6	NIC20.1596	NIC20	Taiwan	16	6/03/15	14	11	293	658.946667	0.10414206	0.059631626	0.12086319	0.060333104	0
wormd20150603s28NIC20QR24rt16w07r15	6	NIC20.1596	NIC20	Taiwan	16	6/03/15	15	10	293	575.476667	0.06712246	0.059631626	0.06936195	0.060333104	0
wormd20150603s28NIC20QR24rt16w07r16	6	NIC20.1596	NIC20	Taiwan	16	6/03/15	16	9	293	553.756667	0.06394835	0.059631626	0.06332962	0.060333104	0
wormd20150603s28NIC20QR24rt16w07r17	6	NIC20.1596	NIC20	Taiwan	16	6/03/15	17	8	293	550.356667	0.05963163	0.059631626	0.0603331	0.060333104	0
wormd20150603s28NIC20QR24rt16w08r00	7	NIC20.1597	NIC20	Taiwan	16	6/03/15	0	25	174	718.159696	0.41154386	0.092386382	0.68808484	0.093750022	1
wormd20150603s28NIC20QR24rt16w08r02	7	NIC20.1597	NIC20	Taiwan	16	6/03/15	2	23	151	744.462555	0.31824792	0.092386382	0.67952797	0.093750022	1
wormd20150603s28NIC20QR24rt16w08r03	7	NIC20.1597	NIC20	Taiwan	16	6/03/15	3	22	119	722.480874	0.27942396	0.092386382	0.6418934	0.093750022	1
wormd20150603s28NIC20QR24rt16w08r04	7	NIC20.1597	NIC20	Taiwan	16	6/03/15	4	21	153	753.12069	0.28274166	0.092386382	0.6394049	0.093750022	1
wormd20150603s28NIC20QR24rt16w08r05	7	NIC20.1597	NIC20	Taiwan	16	6/03/15	5	20	130	706.133803	0.31533673	0.092386382	0.68826385	0.093750022	1
wormd20150603s28NIC20QR24rt16w08r06	7	NIC20.1597	NIC20	Taiwan	16	6/03/15	6	19	185	716.6	0.35106459	0.092386382	0.7560163	0.093750022	1
wormd20150603s28NIC20QR24rt16w08r07	7	NIC20.1597	NIC20	Taiwan	16	6/03/15	7	18	211	731.486891	0.27432011	0.092386382	0.70060917	0.093750022	1
wormd20150603s28NIC20QR24rt16w08r08	7	NIC20.1597	NIC20	Taiwan	16	6/03/15	8	17	138	658.117241	0.31243566	0.092386382	0.75113205	0.093750022	1
wormd20150603s28NIC20QR24rt16w08r09	7	NIC20.1597	NIC20	Taiwan	16	6/03/15	9	16	198	665.975248	0.2841343	0.092386382	0.76462465	0.093750022	1
wormd20150603s28NIC20QR24rt16w08r10	7	NIC20.1597	NIC20	Taiwan	16	6/03/15	10	15	154	728.489583	0.19039299	0.092386382	0.5976491	0.093750022	1
wormd20150603s28NIC20QR24rt16w08r11	7	NIC20.1597	NIC20	Taiwan	16	6/03/15	11	14	235	693.566116	0.21104554	0.092386382	0.67714466	0.093750022	1
wormd20150603s28NIC20QR24rt16w08r13	7	NIC20.1597	NIC20	Taiwan	16	6/03/15	13	12	164	766.97235	0.09238638	0.092386382	0.16963766	0.093750022	1
wormd20150603s28NIC20QR24rt16w08r15	7	NIC20.1597	NIC20	Taiwan	16	6/03/15	15	10	293	743.496667	0.09284815	0.092386382	0.09734512	0.093750022	0
wormd20150603s28NIC20QR24rt16w08r16	7	NIC20.1597	NIC20	Taiwan	16	6/03/15	16	9	293	760.456667	0.09392707	0.092386382	0.09640176	0.093750022	0
wormd20150603s28NIC20QR24rt16w08r17	7	NIC20.1597	NIC20	Taiwan	16	6/03/15	17	8	293	751.413333	0.09341725	0.092386382	0.09375002	0.093750022	0
wormd20150603s28NIC20QR24rt16w09r00	8	NIC20.1598	NIC20	Taiwan	16	6/03/15	0	25	276	700.020202	0.29320728	0.097259188	0.70843841	0.096734618	1
wormd20150603s28NIC20QR24rt16w09r01	8	NIC20.1598	NIC20	Taiwan	16	6/03/15	1	24	203	666.539474	0.3697226	0.097259188	0.72754314	0.096734618	1
wormd20150603s28NIC20QR24rt16w09r02	8	NIC20.1598	NIC20	Taiwan	16	6/03/15	2	23	266	665.062271	0.31800789	0.097259188	0.71806898	0.096734618	1
wormd20150603s28NIC20QR24rt16w09r03	8	NIC20.1598	NIC20	Taiwan	16	6/03/15	3	22	254	680.812261	0.31494167	0.097259188	0.71420022	0.096734618	1
wormd20150603s28NIC20QR24rt16w09r04	8	NIC20.1598	NIC20	Taiwan	16	6/03/15	4	21	258	679.279245	0.2769237	0.097259188	0.68014369	0.096734618	1
wormd20150603s28NIC20QR24rt16w09r05	8	NIC20.1598	NIC20	Taiwan	16	6/03/15	5	20	281	679.152778	0.26919031	0.097259188	0.69186371	0.096734618	1
wormd20150603s28NIC20QR24rt16w09r06	8	NIC20.1598	NIC20	Taiwan	16	6/03/15	6	19	278	640.631579	0.26435211	0.097259188	0.66789895	0.096734618	1
wormd20150603s28NIC20QR24rt16w09r07	8	NIC20.1598	NIC20	Taiwan	16	6/03/15	7	18	252	661.72973	0.20108267	0.097259188	0.5217007	0.096734618	1
wormd20150603s28NIC20QR24rt16w09r08	8	NIC20.1598	NIC20	Taiwan	16	6/03/15	8	17	109	583.206897	0.25177726	0.097259188	0.72168948	0.096734618	1
wormd20150603s28NIC20QR24rt16w09r09	8	NIC20.1598	NIC20	Taiwan	16	6/03/15	9	16	233	633.39916	0.24473689	0.097259188	0.73553899	0.096734618	1
wormd20150603s28NIC20QR24rt16w09r10	8	NIC20.1598	NIC20	Taiwan	16	6/03/15	10	15	267	620.806569	0.17098389	0.097259188	0.48290198	0.096734618	1
wormd20150603s28NIC20QR24rt16w09r11	8	NIC20.1598	NIC20	Taiwan	16	6/03/15	11	14	293	690.14	0.17138421	0.097259188	0.49877942	0.096734618	1
wormd20150603s28NIC20QR24rt16w09r12	8	NIC20.1598	NIC20	Taiwan	16	6/03/15	12	13	267	609.79927	0.10332641	0.097259188	0.15983825	0.096734618	1
wormd20150603s28NIC20QR24rt16w09r13	8	NIC20.1598	NIC20	Taiwan	16	6/03/15	13	12	201	554.487805	0.10784184	0.097259188	0.13269196	0.096734618	0
wormd20150603s28NIC20QR24rt16w09r14	8	NIC20.1598	NIC20	Taiwan	16	6/03/15	14	11	250	526.603846	0.1122746	0.097259188	0.1287877	0.096734618	0
wormd20150603s28NIC20QR24rt16w09r16	8	NIC20.1598	NIC20	Taiwan	16	6/03/15	16	9	293	645.613333	0.09921583	0.097259188	0.09937705	0.096734618	0
wormd20150603s28NIC20QR24rt16w09r17	8	NIC20.1598	NIC20	Taiwan	16	6/03/15	17	8	293	665.083333	0.09725919	0.097259188	0.09673462	0.096734618	0
wormd20150603s28NIC20QR24rt16w13r00	12	NIC20.1599	NIC20	Taiwan	16	6/03/15	0	25	293	549.22	0.34420698	0.048417425	0.74969172	0.048550917	1
wormd20150603s28NIC20QR24rt16w13r01	12	NIC20.1599	NIC20	Taiwan	16	6/03/15	1	24	293	590.903333	0.31190617	0.048417425	0.73170612	0.048550917	1
wormd20150603s28NIC20QR24rt16w13r02	12	NIC20.1599	NIC20	Taiwan	16	6/03/15	2	23	271	533.392086	0.36139086	0.048417425	0.72261571	0.048550917	1
wormd20150603s28NIC20QR24rt16w13r03	12	NIC20.1599	NIC20	Taiwan	16	6/03/15	3	22	293	553.813333	0.2820715	0.048417425	0.68799355	0.048550917	1
wormd20150603s28NIC20QR24rt16w13r04	12	NIC20.1599	NIC20	Taiwan	16	6/03/15	4	21	227	495.465812	0.36753749	0.048417425	0.73184301	0.048550917	1
wormd20150603s28NIC20QR24rt16w13r05	12	NIC20.1599	NIC20	Taiwan	16	6/03/15	5	20	290	479.720539	0.33031772	0.048417425	0.70134936	0.048550917	1
wormd20150603s28NIC20QR24rt16w13r06	12	NIC20.1599	NIC20	Taiwan	16	6/03/15	6	19	235	522.670886	0.35405382	0.048417425	0.78673653	0.048550917	1
wormd20150603s28NIC20QR24rt16w13r07	12	NIC20.1599	NIC20	Taiwan	16	6/03/15	7	18	287	573.29932	0.29747794	0.048417425	0.70056684	0.048550917	1
wormd20150603s28NIC20QR24rt16w13r09	12	NIC20.1599	NIC20	Taiwan	16	6/03/15	9	16	198	530.058537	0.25119467	0.048417425	0.70379854	0.048550917	1
wormd20150603s28NIC20QR24rt16w13r10	12	NIC20.1599	NIC20	Taiwan	16	6/03/15	10	15	215	413.959459	0.21321304	0.048417425	0.60066566	0.048550917	1
wormd20150603s28NIC20QR24rt16w13r11	12	NIC20.1599	NIC20	Taiwan	16	6/03/15	11	14	282	525.698962	0.21931399	0.048417425	0.67147945	0.048550917	1
wormd20150603s28NIC20QR24rt16w13r12	12	NIC20.1599	NIC20	Taiwan	16	6/03/15	12	13	293	551.236667	0.17506972	0.048417425	0.61179502	0.048550917	1
wormd20150603s28NIC20QR24rt16w13r13	12	NIC20.1599	NIC20	Taiwan	16	6/03/15	13	12	293	610.236667	0.09721758	0.048417425	0.19097623	0.048550917	1
wormd20150603s28NIC20QR24rt16w13r14	12	NIC20.1599	NIC20	Taiwan	16	6/03/15	14	11	293	605.32	0.0845986	0.048417425	0.09657308	0.048550917	0
wormd20150603s28NIC20QR24rt16w13r15	12	NIC20.1599	NIC20	Taiwan	16	6/03/15	15	10	293	558.546667	0.05768202	0.048417425	0.06098173	0.048550917	0
wormd20150603s28NIC20QR24rt16w13r16	12	NIC20.1599	NIC20	Taiwan	16	6/03/15	16	9	293	577.593333	0.05310797	0.048417425	0.05419597	0.048550917	0
wormd20150603s28NIC20QR24rt16w13r17	12	NIC20.1599	NIC20	Taiwan	16	6/03/15	17	8	293	569.42	0.04841743	0.048417425	0.04855092	0.048550917	0
wormd20150603s28NIC20QR24rt16w14r00	13	NIC20.1600	NIC20	Taiwan	16	6/03/15	0	25	293	451.063333	0.49532142	0.093502526	0.82909918	0.092353814	1
wormd20150603s28NIC20QR24rt16w14r01	13	NIC20.1600	NIC20	Taiwan	16	6/03/15	1	24	293	459.283333	0.40884521	0.093502526	0.80499795	0.092353814	1
wormd20150603s28NIC20QR24rt16w14r02	13	NIC20.1600	NIC20	Taiwan	16	6/03/15	2	23	278	451.775439	0.41344512	0.093502526	0.79963266	0.092353814	1
wormd20150603s28NIC20QR24rt16w14r03	13	NIC20.1600	NIC20	Taiwan	16	6/03/15	3	22	125	503.484375	0.37114288	0.093502526	0.74156837	0.092353814	1
wormd20150603s28NIC20QR24rt16w14r04	13	NIC20.1600	NIC20	Taiwan	16	6/03/15	4	21	177	109.774725	0.22293205	0.093502526	0.23489591	0.092353814	1
wormd20150603s28NIC20QR24rt16w14r05	13	NIC20.1600	NIC20	Taiwan	16	6/03/15	5	20	228	139.573276	0.21104224	0.093502526	0.22586168	0.092353814	1
wormd20150603s28NIC20QR24rt16w14r06	13	NIC20.1600	NIC20	Taiwan	16	6/03/15	6	19	273	185.432143	0.18033968	0.093502526	0.18749195	0.092353814	1
wormd20150603s28NIC20QR24rt16w14r07	13	NIC20.1600	NIC20	Taiwan	16	6/03/15	7	18	292	226.494983	0.17202853	0.093502526	0.17624799	0.092353814	1
wormd20150603s28NIC20QR24rt16w14r08	13	NIC20.1600	NIC20	Taiwan	16	6/03/15	8	17	292	269.745819	0.17677375	0.093502526	0.17689132	0.092353814	1
wormd20150603s28NIC20QR24rt16w14r09	13	NIC20.1600	NIC20	Taiwan	16	6/03/15	9	16	293	316.256667	0.15949983	0.093502526	0.16055926	0.092353814	1
wormd20150603s28NIC20QR24rt16w14r10	13	NIC20.1600	NIC20	Taiwan	16	6/03/15	10	15	293	348.983333	0.15090704	0.093502526	0.15320451	0.092353814	1
wormd20150603s28NIC20QR24rt16w14r11	13	NIC20.1600	NIC20	Taiwan	16	6/03/15	11	14	293	388.153333	0.13885	0.093502526	0.14031063	0.092353814	1
wormd20150603s28NIC20QR24rt16w14r12	13	NIC20.1600	NIC20	Taiwan	16	6/03/15	12	13	293	424.793333	0.12580324	0.093502526	0.12823475	0.092353814	0
wormd20150603s28NIC20QR24rt16w14r13	13	NIC20.1600	NIC20	Taiwan	16	6/03/15	13	12	293	458.833333	0.11744297	0.093502526	0.11926753	0.092353814	0
wormd20150603s28NIC20QR24rt16w14r14	13	NIC20.1600	NIC20	Taiwan	16	6/03/15	14	11	293	489.756667	0.10687847	0.093502526	0.1072755	0.092353814	0
wormd20150603s28NIC20QR24rt16w14r15	13	NIC20.1600	NIC20	Taiwan	16	6/03/15	15	10	293	518.27	0.10431948	0.093502526	0.10331166	0.092353814	0
wormd20150603s28NIC20QR24rt16w14r16	13	NIC20.1600	NIC20	Taiwan	16	6/03/15	16	9	293	549.71	0.09746686	0.093502526	0.09833282	0.092353814	0
wormd20150603s28NIC20QR24rt16w14r17	13	NIC20.1600	NIC20	Taiwan	16	6/03/15	17	8	293	582.986667	0.09350253	0.093502526	0.09235381	0.092353814	0
wormd20150603s28NIC20QR24rt16w15r00	14	NIC20.1601	NIC20	Taiwan	16	6/03/15	0	25	293	481.07	0.43571548	0.091647545	0.78632581	0.091470794	1
wormd20150603s28NIC20QR24rt16w15r01	14	NIC20.1601	NIC20	Taiwan	16	6/03/15	1	24	293	450.97	0.41254447	0.091647545	0.81187155	0.091470794	1
wormd20150603s28NIC20QR24rt16w15r02	14	NIC20.1601	NIC20	Taiwan	16	6/03/15	2	23	293	489.56	0.36008782	0.091647545	0.78408442	0.091470794	1
wormd20150603s28NIC20QR24rt16w15r03	14	NIC20.1601	NIC20	Taiwan	16	6/03/15	3	22	293	488.8	0.37780536	0.091647545	0.79283017	0.091470794	1
wormd20150603s28NIC20QR24rt16w15r04	14	NIC20.1601	NIC20	Taiwan	16	6/03/15	4	21	293	482.08	0.39028865	0.091647545	0.78565755	0.091470794	1
wormd20150603s28NIC20QR24rt16w15r05	14	NIC20.1601	NIC20	Taiwan	16	6/03/15	5	20	273	476.817857	0.37065055	0.091647545	0.78052556	0.091470794	1
wormd20150603s28NIC20QR24rt16w15r06	14	NIC20.1601	NIC20	Taiwan	16	6/03/15	6	19	281	497.204861	0.21951969	0.091647545	0.61680086	0.091470794	1
wormd20150603s28NIC20QR24rt16w15r07	14	NIC20.1601	NIC20	Taiwan	16	6/03/15	7	18	278	420.694737	0.39863929	0.091647545	0.83486797	0.091470794	1
wormd20150603s28NIC20QR24rt16w15r08	14	NIC20.1601	NIC20	Taiwan	16	6/03/15	8	17	278	466.084211	0.30158522	0.091647545	0.7665611	0.091470794	1
wormd20150603s28NIC20QR24rt16w15r09	14	NIC20.1601	NIC20	Taiwan	16	6/03/15	9	16	282	485.989619	0.34158835	0.091647545	0.82263055	0.091470794	1
wormd20150603s28NIC20QR24rt16w15r10	14	NIC20.1601	NIC20	Taiwan	16	6/03/15	10	15	282	476.200692	0.3162618	0.091647545	0.82702272	0.091470794	1
wormd20150603s28NIC20QR24rt16w15r11	14	NIC20.1601	NIC20	Taiwan	16	6/03/15	11	14	293	446.1	0.20961466	0.091647545	0.66528788	0.091470794	1
wormd20150603s28NIC20QR24rt16w15r12	14	NIC20.1601	NIC20	Taiwan	16	6/03/15	12	13	290	426.430976	0.10433965	0.091647545	0.24222733	0.091470794	1
wormd20150603s28NIC20QR24rt16w15r13	14	NIC20.1601	NIC20	Taiwan	16	6/03/15	13	12	293	495.243333	0.09349499	0.091647545	0.11793406	0.091470794	0
wormd20150603s28NIC20QR24rt16w15r14	14	NIC20.1601	NIC20	Taiwan	16	6/03/15	14	11	293	448.996667	0.0941558	0.091647545	0.10482365	0.091470794	0
wormd20150603s28NIC20QR24rt16w15r15	14	NIC20.1601	NIC20	Taiwan	16	6/03/15	15	10	293	462.66	0.09236364	0.091647545	0.09555032	0.091470794	0
wormd20150603s28NIC20QR24rt16w15r16	14	NIC20.1601	NIC20	Taiwan	16	6/03/15	16	9	293	482.89	0.09212807	0.091647545	0.09306867	0.091470794	0
wormd20150603s28NIC20QR24rt16w15r17	14	NIC20.1601	NIC20	Taiwan	16	6/03/15	17	8	293	471.416667	0.09164754	0.091647545	0.09147079	0.091470794	0
wormd20150524s14EG4181NIC20rt23w04r00	3	NIC20.1518	NIC20	Taiwan	23	5/24/15	0	25.03423265	226	450.168831	0.50851678	0.056299644	0.56512688	0.056728718	1
wormd20150524s14EG4181NIC20rt23w04r01	3	NIC20.1518	NIC20	Taiwan	23	5/24/15	1	26.09545714	173	420.361582	0.39204176	0.056299644	0.4068797	0.056728718	1
wormd20150524s14EG4181NIC20rt23w04r02	3	NIC20.1518	NIC20	Taiwan	23	5/24/15	2	27.15668163	113	501.779661	0.53373007	0.056299644	0.56987616	0.056728718	1
wormd20150524s14EG4181NIC20rt23w04r03	3	NIC20.1518	NIC20	Taiwan	23	5/24/15	3	28.21790612	161	528.445122	0.48793852	0.056299644	0.54951874	0.056728718	1
wormd20150524s14EG4181NIC20rt23w04r04	3	NIC20.1518	NIC20	Taiwan	23	5/24/15	4	29.27913061	204	516.196172	0.53957147	0.056299644	0.64075801	0.056728718	1
wormd20150524s14EG4181NIC20rt23w04r06	3	NIC20.1518	NIC20	Taiwan	23	5/24/15	6	31.40157959	225	535.422414	0.53343332	0.056299644	0.68044964	0.056728718	1
wormd20150524s14EG4181NIC20rt23w04r07	3	NIC20.1518	NIC20	Taiwan	23	5/24/15	7	32.46280408	219	526.355556	0.49147071	0.056299644	0.69172478	0.056728718	1
wormd20150524s14EG4181NIC20rt23w04r08	3	NIC20.1518	NIC20	Taiwan	23	5/24/15	8	33.52402857	131	448.416058	0.19622083	0.056299644	0.62570068	0.056728718	1
wormd20150524s14EG4181NIC20rt23w04r11	3	NIC20.1518	NIC20	Taiwan	23	5/24/15	11	36.70770204	111	285.576271	0.07801269	0.056299644	0.13047008	0.056728718	0
wormd20150524s14EG4181NIC20rt23w04r13	3	NIC20.1518	NIC20	Taiwan	23	5/24/15	13	38.83015102	213	491.93578	0.06756189	0.056299644	0.06941817	0.056728718	0
wormd20150524s14EG4181NIC20rt23w04r14	3	NIC20.1518	NIC20	Taiwan	23	5/24/15	14	39.89137551	293	508.826667	0.06634678	0.056299644	0.06587436	0.056728718	0
wormd20150524s14EG4181NIC20rt23w04r15	3	NIC20.1518	NIC20	Taiwan	23	5/24/15	15	40.9526	293	536.946667	0.05629964	0.056299644	0.05672872	0.056728718	0
wormd20150524s14EG4181NIC20rt23w05r00	4	NIC20.1519	NIC20	Taiwan	23	5/24/15	0	25.03423265	271	526.176259	0.5064019	0.06794034	0.583068	0.067863392	1
wormd20150524s14EG4181NIC20rt23w05r02	4	NIC20.1519	NIC20	Taiwan	23	5/24/15	2	27.15668163	119	547.760331	0.52871051	0.06794034	0.61952915	0.067863392	1
wormd20150524s14EG4181NIC20rt23w05r04	4	NIC20.1519	NIC20	Taiwan	23	5/24/15	4	29.27913061	242	493.191837	0.62675841	0.06794034	0.74821732	0.067863392	1
wormd20150524s14EG4181NIC20rt23w05r05	4	NIC20.1519	NIC20	Taiwan	23	5/24/15	5	30.3403551	242	510.510121	0.54014181	0.06794034	0.69271676	0.067863392	1
wormd20150524s14EG4181NIC20rt23w05r08	4	NIC20.1519	NIC20	Taiwan	23	5/24/15	8	33.52402857	258	481.769811	0.28881864	0.06794034	0.78518964	0.067863392	1
wormd20150524s14EG4181NIC20rt23w05r09	4	NIC20.1519	NIC20	Taiwan	23	5/24/15	9	34.58525306	293	584.226667	0.06794034	0.06794034	0.06786339	0.067863392	0
wormd20150524s14EG4181NIC20rt23w05r10	4	NIC20.1519	NIC20	Taiwan	23	5/24/15	10	35.64647755	293	567.16	0.06819068	0.06794034	0.07995417	0.067863392	0
wormd20150524s14EG4181NIC20rt23w05r11	4	NIC20.1519	NIC20	Taiwan	23	5/24/15	11	36.70770204	293	544.353333	0.07089903	0.06794034	0.1001699	0.067863392	0
wormd20150524s14EG4181NIC20rt23w05r12	4	NIC20.1519	NIC20	Taiwan	23	5/24/15	12	37.76892653	293	520.12	0.07508604	0.06794034	0.10610751	0.067863392	0
wormd20150524s14EG4181NIC20rt23w05r13	4	NIC20.1519	NIC20	Taiwan	23	5/24/15	13	38.83015102	293	504.913333	0.06829113	0.06794034	0.06832219	0.067863392	0
wormd20150524s14EG4181NIC20rt23w05r14	4	NIC20.1519	NIC20	Taiwan	23	5/24/15	14	39.89137551	293	479.833333	0.07006848	0.06794034	0.07012611	0.067863392	0
wormd20150524s14EG4181NIC20rt23w05r15	4	NIC20.1519	NIC20	Taiwan	23	5/24/15	15	40.9526	293	458.736667	0.0737108	0.06794034	0.07289105	0.067863392	0
wormd20150524s14EG4181NIC20rt23w06r00	5	NIC20.1520	NIC20	Taiwan	23	5/24/15	0	25.03423265	181	495.452128	0.46314096	0.066852668	0.54582107	0.066547886	1
wormd20150524s14EG4181NIC20rt23w06r01	5	NIC20.1520	NIC20	Taiwan	23	5/24/15	1	26.09545714	190	245.353234	0.1624607	0.066852668	0.18683625	0.066547886	1
wormd20150524s14EG4181NIC20rt23w06r02	5	NIC20.1520	NIC20	Taiwan	23	5/24/15	2	27.15668163	141	449.13986	0.59314729	0.066852668	0.71471952	0.066547886	1
wormd20150524s14EG4181NIC20rt23w06r04	5	NIC20.1520	NIC20	Taiwan	23	5/24/15	4	29.27913061	255	479.385496	0.56523887	0.066852668	0.67950414	0.066547886	1
wormd20150524s14EG4181NIC20rt23w06r06	5	NIC20.1520	NIC20	Taiwan	23	5/24/15	6	31.40157959	260	469.022556	0.5802524	0.066852668	0.70332	0.066547886	1
wormd20150524s14EG4181NIC20rt23w06r07	5	NIC20.1520	NIC20	Taiwan	23	5/24/15	7	32.46280408	159	213.140244	0.12944279	0.066852668	0.2128665	0.066547886	1
wormd20150524s14EG4181NIC20rt23w06r08	5	NIC20.1520	NIC20	Taiwan	23	5/24/15	8	33.52402857	287	435.744898	0.26228012	0.066852668	0.74424479	0.066547886	1
wormd20150524s14EG4181NIC20rt23w06r09	5	NIC20.1520	NIC20	Taiwan	23	5/24/15	9	34.58525306	293	615.013333	0.15554436	0.066852668	0.59161898	0.066547886	1
wormd20150524s14EG4181NIC20rt23w06r10	5	NIC20.1520	NIC20	Taiwan	23	5/24/15	10	35.64647755	293	554.186667	0.06685267	0.066852668	0.06654789	0.066547886	0
wormd20150524s14EG4181NIC20rt23w06r11	5	NIC20.1520	NIC20	Taiwan	23	5/24/15	11	36.70770204	293	551.646667	0.06937511	0.066852668	0.06979887	0.066547886	0
wormd20150524s14EG4181NIC20rt23w06r12	5	NIC20.1520	NIC20	Taiwan	23	5/24/15	12	37.76892653	293	552.813333	0.06954014	0.066852668	0.07028404	0.066547886	0
wormd20150524s14EG4181NIC20rt23w06r13	5	NIC20.1520	NIC20	Taiwan	23	5/24/15	13	38.83015102	293	570.893333	0.06934325	0.066852668	0.06903596	0.066547886	0
wormd20150524s14EG4181NIC20rt23w06r14	5	NIC20.1520	NIC20	Taiwan	23	5/24/15	14	39.89137551	293	591.7	0.06961105	0.066852668	0.06986655	0.066547886	0
wormd20150524s14EG4181NIC20rt23w06r15	5	NIC20.1520	NIC20	Taiwan	23	5/24/15	15	40.9526	293	583.063333	0.07032603	0.066852668	0.07100909	0.066547886	0
wormd20150524s14EG4181NIC20rt23w10r00	9	NIC20.1521	NIC20	Taiwan	23	5/24/15	0	25.03423265	293	528.77	0.46910568	0.062401105	0.59646827	0.06204552	1
wormd20150524s14EG4181NIC20rt23w10r01	9	NIC20.1521	NIC20	Taiwan	23	5/24/15	1	26.09545714	126	419.59542	0.38755225	0.062401105	0.41368791	0.06204552	1
wormd20150524s14EG4181NIC20rt23w10r02	9	NIC20.1521	NIC20	Taiwan	23	5/24/15	2	27.15668163	224	218.229437	0.12289008	0.062401105	0.13893566	0.06204552	0
wormd20150524s14EG4181NIC20rt23w10r03	9	NIC20.1521	NIC20	Taiwan	23	5/24/15	3	28.21790612	221	188.868421	0.08518793	0.062401105	0.11962698	0.06204552	0
wormd20150524s14EG4181NIC20rt23w10r04	9	NIC20.1521	NIC20	Taiwan	23	5/24/15	4	29.27913061	114	185.138211	0.07698567	0.062401105	0.11811005	0.06204552	0
wormd20150524s14EG4181NIC20rt23w10r09	9	NIC20.1521	NIC20	Taiwan	23	5/24/15	9	34.58525306	107	515.206107	0.06630217	0.062401105	0.07034842	0.06204552	0
wormd20150524s14EG4181NIC20rt23w10r10	9	NIC20.1521	NIC20	Taiwan	23	5/24/15	10	35.64647755	180	511.391459	0.0624011	0.062401105	0.06204552	0.06204552	0
wormd20150524s14EG4181NIC20rt23w10r12	9	NIC20.1521	NIC20	Taiwan	23	5/24/15	12	37.76892653	293	521.316667	0.08007993	0.062401105	0.08126656	0.06204552	0
wormd20150524s14EG4181NIC20rt23w10r13	9	NIC20.1521	NIC20	Taiwan	23	5/24/15	13	38.83015102	293	490.613333	0.07729094	0.062401105	0.07711081	0.06204552	0
wormd20150524s14EG4181NIC20rt23w10r14	9	NIC20.1521	NIC20	Taiwan	23	5/24/15	14	39.89137551	293	469.61	0.07645658	0.062401105	0.07726715	0.06204552	0
wormd20150524s14EG4181NIC20rt23w10r15	9	NIC20.1521	NIC20	Taiwan	23	5/24/15	15	40.9526	293	452.403333	0.07527792	0.062401105	0.07494517	0.06204552	0
wormd20150524s14EG4181NIC20rt23w11r00	10	NIC20.1522	NIC20	Taiwan	23	5/24/15	0	25.03423265	275	603.402135	0.54017559	0.074774331	0.60214739	0.074736346	1
wormd20150524s14EG4181NIC20rt23w11r01	10	NIC20.1522	NIC20	Taiwan	23	5/24/15	1	26.09545714	158	568.914634	0.54393761	0.074774331	0.5654201	0.074736346	1
wormd20150524s14EG4181NIC20rt23w11r03	10	NIC20.1522	NIC20	Taiwan	23	5/24/15	3	28.21790612	126	539	0.52367173	0.074774331	0.5860321	0.074736346	1
wormd20150524s14EG4181NIC20rt23w11r04	10	NIC20.1522	NIC20	Taiwan	23	5/24/15	4	29.27913061	210	574.24898	0.50711959	0.074774331	0.61285052	0.074736346	1
wormd20150524s14EG4181NIC20rt23w11r05	10	NIC20.1522	NIC20	Taiwan	23	5/24/15	5	30.3403551	143	622.554945	0.40903621	0.074774331	0.54025847	0.074736346	1
wormd20150524s14EG4181NIC20rt23w11r06	10	NIC20.1522	NIC20	Taiwan	23	5/24/15	6	31.40157959	195	569.15122	0.48317711	0.074774331	0.6275886	0.074736346	1
wormd20150524s14EG4181NIC20rt23w11r07	10	NIC20.1522	NIC20	Taiwan	23	5/24/15	7	32.46280408	251	565.953488	0.4274545	0.074774331	0.67227136	0.074736346	1
wormd20150524s14EG4181NIC20rt23w11r08	10	NIC20.1522	NIC20	Taiwan	23	5/24/15	8	33.52402857	109	569.445205	0.31584443	0.074774331	0.66611065	0.074736346	1
wormd20150524s14EG4181NIC20rt23w11r09	10	NIC20.1522	NIC20	Taiwan	23	5/24/15	9	34.58525306	263	674.426117	0.13034334	0.074774331	0.51168396	0.074736346	1
wormd20150524s14EG4181NIC20rt23w11r10	10	NIC20.1522	NIC20	Taiwan	23	5/24/15	10	35.64647755	293	546.453333	0.08194851	0.074774331	0.08178575	0.074736346	0
wormd20150524s14EG4181NIC20rt23w11r11	10	NIC20.1522	NIC20	Taiwan	23	5/24/15	11	36.70770204	293	568.096667	0.07831463	0.074774331	0.07870889	0.074736346	0
wormd20150524s14EG4181NIC20rt23w11r12	10	NIC20.1522	NIC20	Taiwan	23	5/24/15	12	37.76892653	293	573.486667	0.07477433	0.074774331	0.07473635	0.074736346	0
wormd20150524s14EG4181NIC20rt23w11r13	10	NIC20.1522	NIC20	Taiwan	23	5/24/15	13	38.83015102	293	556.896667	0.07594489	0.074774331	0.07638208	0.074736346	0
wormd20150524s14EG4181NIC20rt23w11r14	10	NIC20.1522	NIC20	Taiwan	23	5/24/15	14	39.89137551	293	543.136667	0.08161035	0.074774331	0.08032018	0.074736346	0
wormd20150524s14EG4181NIC20rt23w11r15	10	NIC20.1522	NIC20	Taiwan	23	5/24/15	15	40.9526	293	558.926667	0.07728941	0.074774331	0.07698876	0.074736346	0
wormd20150524s14EG4181NIC20rt23w12r00	11	NIC20.1523	NIC20	Taiwan	23	5/24/15	0	25.03423265	264	584.900369	0.54689789	0.077003284	0.64108462	0.076315942	1
wormd20150524s14EG4181NIC20rt23w12r01	11	NIC20.1523	NIC20	Taiwan	23	5/24/15	1	26.09545714	104	565.370079	0.5212445	0.077003284	0.60653006	0.076315942	1
wormd20150524s14EG4181NIC20rt23w12r02	11	NIC20.1523	NIC20	Taiwan	23	5/24/15	2	27.15668163	189	538.841837	0.47743855	0.077003284	0.5845431	0.076315942	1
wormd20150524s14EG4181NIC20rt23w12r03	11	NIC20.1523	NIC20	Taiwan	23	5/24/15	3	28.21790612	115	434.210526	0.33744557	0.077003284	0.44250227	0.076315942	1
wormd20150524s14EG4181NIC20rt23w12r04	11	NIC20.1523	NIC20	Taiwan	23	5/24/15	4	29.27913061	224	581.42735	0.42794334	0.077003284	0.50830338	0.076315942	1
wormd20150524s14EG4181NIC20rt23w12r05	11	NIC20.1523	NIC20	Taiwan	23	5/24/15	5	30.3403551	110	452.625	0.42587793	0.077003284	0.52131615	0.076315942	1
wormd20150524s14EG4181NIC20rt23w12r06	11	NIC20.1523	NIC20	Taiwan	23	5/24/15	6	31.40157959	293	539.456667	0.45658034	0.077003284	0.73464736	0.076315942	1
wormd20150524s14EG4181NIC20rt23w12r08	11	NIC20.1523	NIC20	Taiwan	23	5/24/15	8	33.52402857	236	520.628099	0.15164379	0.077003284	0.49704871	0.076315942	1
wormd20150524s14EG4181NIC20rt23w12r09	11	NIC20.1523	NIC20	Taiwan	23	5/24/15	9	34.58525306	293	524.706667	0.08745649	0.077003284	0.09642642	0.076315942	0
wormd20150524s14EG4181NIC20rt23w12r10	11	NIC20.1523	NIC20	Taiwan	23	5/24/15	10	35.64647755	293	508.2	0.08645872	0.077003284	0.08783655	0.076315942	0
wormd20150524s14EG4181NIC20rt23w12r11	11	NIC20.1523	NIC20	Taiwan	23	5/24/15	11	36.70770204	293	506.75	0.08163456	0.077003284	0.08359404	0.076315942	0
wormd20150524s14EG4181NIC20rt23w12r12	11	NIC20.1523	NIC20	Taiwan	23	5/24/15	12	37.76892653	293	517.596667	0.08208829	0.077003284	0.08250625	0.076315942	0
wormd20150524s14EG4181NIC20rt23w12r13	11	NIC20.1523	NIC20	Taiwan	23	5/24/15	13	38.83015102	293	548.146667	0.07700328	0.077003284	0.07631594	0.076315942	0
wormd20150524s14EG4181NIC20rt23w12r14	11	NIC20.1523	NIC20	Taiwan	23	5/24/15	14	39.89137551	293	510.95	0.08421471	0.077003284	0.08392061	0.076315942	0
wormd20150524s14EG4181NIC20rt23w12r15	11	NIC20.1523	NIC20	Taiwan	23	5/24/15	15	40.9526	293	508.193333	0.07933409	0.077003284	0.08025357	0.076315942	0
wormd20150524s14EG4181NIC20rt23w16r00	15	NIC20.1524	NIC20	Taiwan	23	5/24/15	0	25.03423265	287	553.380952	0.42819026	0.069959313	0.61180356	0.069853264	1
wormd20150524s14EG4181NIC20rt23w16r03	15	NIC20.1524	NIC20	Taiwan	23	5/24/15	3	28.21790612	120	406.458015	0.23730833	0.069959313	0.27430562	0.069853264	1
wormd20150524s14EG4181NIC20rt23w16r07	15	NIC20.1524	NIC20	Taiwan	23	5/24/15	7	32.46280408	184	585.626168	0.314775	0.069959313	0.77059497	0.069853264	1
wormd20150524s14EG4181NIC20rt23w16r08	15	NIC20.1524	NIC20	Taiwan	23	5/24/15	8	33.52402857	236	573.253012	0.23956	0.069959313	0.76328386	0.069853264	1
wormd20150524s14EG4181NIC20rt23w16r09	15	NIC20.1524	NIC20	Taiwan	23	5/24/15	9	34.58525306	215	553.623134	0.15924291	0.069959313	0.59934902	0.069853264	1
wormd20150524s14EG4181NIC20rt23w16r10	15	NIC20.1524	NIC20	Taiwan	23	5/24/15	10	35.64647755	293	591.85	0.07731073	0.069959313	0.07705867	0.069853264	0
wormd20150524s14EG4181NIC20rt23w16r11	15	NIC20.1524	NIC20	Taiwan	23	5/24/15	11	36.70770204	293	584.55	0.07757937	0.069959313	0.07757733	0.069853264	0
wormd20150524s14EG4181NIC20rt23w16r12	15	NIC20.1524	NIC20	Taiwan	23	5/24/15	12	37.76892653	293	582.086667	0.07302102	0.069959313	0.07292339	0.069853264	0
wormd20150524s14EG4181NIC20rt23w16r13	15	NIC20.1524	NIC20	Taiwan	23	5/24/15	13	38.83015102	293	601.11	0.07245556	0.069959313	0.07219735	0.069853264	0
wormd20150524s14EG4181NIC20rt23w16r14	15	NIC20.1524	NIC20	Taiwan	23	5/24/15	14	39.89137551	293	599.246667	0.07040295	0.069959313	0.07055482	0.069853264	0
wormd20150524s14EG4181NIC20rt23w16r15	15	NIC20.1524	NIC20	Taiwan	23	5/24/15	15	40.9526	293	601.53	0.06995931	0.069959313	0.06985326	0.069853264	0
wormd20150524s14EG4181NIC20rt23w17r00	16	NIC20.1525	NIC20	Taiwan	23	5/24/15	0	25.03423265	189	423.634021	0.53234856	0.069672223	0.59485245	0.071819452	1
wormd20150524s14EG4181NIC20rt23w17r01	16	NIC20.1525	NIC20	Taiwan	23	5/24/15	1	26.09545714	135	353.884058	0.41748489	0.069672223	0.44568363	0.071819452	1
wormd20150524s14EG4181NIC20rt23w17r03	16	NIC20.1525	NIC20	Taiwan	23	5/24/15	3	28.21790612	151	458.848101	0.53887881	0.069672223	0.63621339	0.071819452	1
wormd20150524s14EG4181NIC20rt23w17r06	16	NIC20.1525	NIC20	Taiwan	23	5/24/15	6	31.40157959	122	359.314815	0.39544258	0.069672223	0.45809656	0.071819452	1
wormd20150524s14EG4181NIC20rt23w17r08	16	NIC20.1525	NIC20	Taiwan	23	5/24/15	8	33.52402857	233	452.379592	0.46388866	0.069672223	0.74301627	0.071819452	1
wormd20150524s14EG4181NIC20rt23w17r09	16	NIC20.1525	NIC20	Taiwan	23	5/24/15	9	34.58525306	286	413.054608	0.08751862	0.069672223	0.09257708	0.071819452	0
wormd20150524s14EG4181NIC20rt23w17r10	16	NIC20.1525	NIC20	Taiwan	23	5/24/15	10	35.64647755	219	405.15415	0.09349352	0.069672223	0.14013406	0.071819452	1
wormd20150524s14EG4181NIC20rt23w17r11	16	NIC20.1525	NIC20	Taiwan	23	5/24/15	11	36.70770204	289	389.263514	0.09745832	0.069672223	0.1276402	0.071819452	0
wormd20150524s14EG4181NIC20rt23w17r12	16	NIC20.1525	NIC20	Taiwan	23	5/24/15	12	37.76892653	293	411.813333	0.08635053	0.069672223	0.08589357	0.071819452	0
wormd20150524s14EG4181NIC20rt23w17r13	16	NIC20.1525	NIC20	Taiwan	23	5/24/15	13	38.83015102	287	396.901361	0.08277787	0.069672223	0.08463126	0.071819452	0
wormd20150524s14EG4181NIC20rt23w17r14	16	NIC20.1525	NIC20	Taiwan	23	5/24/15	14	39.89137551	175	392.516484	0.06967222	0.069672223	0.07181945	0.071819452	0
wormd20150524s14EG4181NIC20rt23w17r15	16	NIC20.1525	NIC20	Taiwan	23	5/24/15	15	40.9526	112	403.02381	0.07379026	0.069672223	0.07621177	0.071819452	0
wormd20150524s14EG4181NIC20rt23w18r00	17	NIC20.1526	NIC20	Taiwan	23	5/24/15	0	25.03423265	282	535.404844	0.52516799	0.059528677	0.6148469	0.059479982	1
wormd20150524s14EG4181NIC20rt23w18r01	17	NIC20.1526	NIC20	Taiwan	23	5/24/15	1	26.09545714	150	341.36646	0.2426665	0.059528677	0.27014368	0.059479982	1
wormd20150524s14EG4181NIC20rt23w18r02	17	NIC20.1526	NIC20	Taiwan	23	5/24/15	2	27.15668163	220	586.859031	0.45135389	0.059528677	0.51191255	0.059479982	1
wormd20150524s14EG4181NIC20rt23w18r03	17	NIC20.1526	NIC20	Taiwan	23	5/24/15	3	28.21790612	258	531.316981	0.5163185	0.059528677	0.62411769	0.059479982	1
wormd20150524s14EG4181NIC20rt23w18r04	17	NIC20.1526	NIC20	Taiwan	23	5/24/15	4	29.27913061	200	523.916667	0.47112131	0.059528677	0.5789123	0.059479982	1
wormd20150524s14EG4181NIC20rt23w18r05	17	NIC20.1526	NIC20	Taiwan	23	5/24/15	5	30.3403551	292	565.481605	0.48186649	0.059528677	0.62415632	0.059479982	1
wormd20150524s14EG4181NIC20rt23w18r07	17	NIC20.1526	NIC20	Taiwan	23	5/24/15	7	32.46280408	110	519.514085	0.33141996	0.059528677	0.75676219	0.059479982	1
wormd20150524s14EG4181NIC20rt23w18r08	17	NIC20.1526	NIC20	Taiwan	23	5/24/15	8	33.52402857	236	676.544061	0.12132602	0.059528677	0.36351037	0.059479982	1
wormd20150524s14EG4181NIC20rt23w18r09	17	NIC20.1526	NIC20	Taiwan	23	5/24/15	9	34.58525306	293	683.576667	0.08500001	0.059528677	0.08490567	0.059479982	0
wormd20150524s14EG4181NIC20rt23w18r10	17	NIC20.1526	NIC20	Taiwan	23	5/24/15	10	35.64647755	293	716.763333	0.07284421	0.059528677	0.15035946	0.059479982	1
wormd20150524s14EG4181NIC20rt23w18r11	17	NIC20.1526	NIC20	Taiwan	23	5/24/15	11	36.70770204	293	744.253333	0.05952868	0.059528677	0.05947998	0.059479982	0
wormd20150524s14EG4181NIC20rt23w18r12	17	NIC20.1526	NIC20	Taiwan	23	5/24/15	12	37.76892653	293	711.426667	0.06530012	0.059528677	0.06519894	0.059479982	0
wormd20150524s14EG4181NIC20rt23w18r13	17	NIC20.1526	NIC20	Taiwan	23	5/24/15	13	38.83015102	293	682.396667	0.06719016	0.059528677	0.06686021	0.059479982	0
wormd20150524s14EG4181NIC20rt23w18r14	17	NIC20.1526	NIC20	Taiwan	23	5/24/15	14	39.89137551	293	637.65	0.07358084	0.059528677	0.07362136	0.059479982	0
wormd20150524s14EG4181NIC20rt23w18r15	17	NIC20.1526	NIC20	Taiwan	23	5/24/15	15	40.9526	293	630.33	0.0735125	0.059528677	0.07439681	0.059479982	0
wormd20150524s41PB826NIC20rt23w04r00	3	NIC20.1536	NIC20	Taiwan	23	5/24/15	0	25.03423265	274	508.032609	0.58991255	0.074111945	0.65497971	0.074464267	1
wormd20150524s41PB826NIC20rt23w04r01	3	NIC20.1536	NIC20	Taiwan	23	5/24/15	1	26.09545714	116	534.049587	0.55747015	0.074111945	0.63857961	0.074464267	1
wormd20150524s41PB826NIC20rt23w04r03	3	NIC20.1536	NIC20	Taiwan	23	5/24/15	3	28.21790612	207	495.787736	0.50865325	0.074111945	0.62243575	0.074464267	1
wormd20150524s41PB826NIC20rt23w04r04	3	NIC20.1536	NIC20	Taiwan	23	5/24/15	4	29.27913061	113	108.38843	0.1039681	0.074111945	0.10948818	0.074464267	0
wormd20150524s41PB826NIC20rt23w04r05	3	NIC20.1536	NIC20	Taiwan	23	5/24/15	5	30.3403551	136	413.811189	0.30953739	0.074111945	0.34537133	0.074464267	1
wormd20150524s41PB826NIC20rt23w04r06	3	NIC20.1536	NIC20	Taiwan	23	5/24/15	6	31.40157959	110	508.243478	0.35881174	0.074111945	0.67848786	0.074464267	1
wormd20150524s41PB826NIC20rt23w04r13	3	NIC20.1536	NIC20	Taiwan	23	5/24/15	13	38.83015102	293	509.06	0.07411195	0.074111945	0.07446427	0.074464267	0
wormd20150524s41PB826NIC20rt23w04r14	3	NIC20.1536	NIC20	Taiwan	23	5/24/15	14	39.89137551	293	499.373333	0.07625261	0.074111945	0.07673038	0.074464267	0
wormd20150524s41PB826NIC20rt23w04r15	3	NIC20.1536	NIC20	Taiwan	23	5/24/15	15	40.9526	293	495.146667	0.07864626	0.074111945	0.0788669	0.074464267	0
wormd20150524s41PB826NIC20rt23w05r00	4	NIC20.1537	NIC20	Taiwan	23	5/24/15	0	25.03423265	285	177.770548	0.02051287	0.020512866	0.02076011	0.02076011	0
wormd20150524s41PB826NIC20rt23w05r03	4	NIC20.1537	NIC20	Taiwan	23	5/24/15	3	28.21790612	188	507.247368	0.51785148	0.020512866	0.62796498	0.02076011	1
wormd20150524s41PB826NIC20rt23w05r04	4	NIC20.1537	NIC20	Taiwan	23	5/24/15	4	29.27913061	104	494.472222	0.41630087	0.020512866	0.5468637	0.02076011	1
wormd20150524s41PB826NIC20rt23w05r05	4	NIC20.1537	NIC20	Taiwan	23	5/24/15	5	30.3403551	110	431.794872	0.40188788	0.020512866	0.60789826	0.02076011	1
wormd20150524s41PB826NIC20rt23w05r10	4	NIC20.1537	NIC20	Taiwan	23	5/24/15	10	35.64647755	100	540.425	0.07659565	0.020512866	0.08277925	0.02076011	0
wormd20150524s41PB826NIC20rt23w05r13	4	NIC20.1537	NIC20	Taiwan	23	5/24/15	13	38.83015102	126	555.763359	0.06584223	0.020512866	0.06525924	0.02076011	0
wormd20150524s41PB826NIC20rt23w05r14	4	NIC20.1537	NIC20	Taiwan	23	5/24/15	14	39.89137551	293	560.41	0.07228856	0.020512866	0.07175012	0.02076011	0
wormd20150524s41PB826NIC20rt23w05r15	4	NIC20.1537	NIC20	Taiwan	23	5/24/15	15	40.9526	293	565.446667	0.07573477	0.020512866	0.07550009	0.02076011	0
wormd20150524s41PB826NIC20rt23w06r00	5	NIC20.1538	NIC20	Taiwan	23	5/24/15	0	25.03423265	262	685.691489	0.46806572	0.070264156	0.59138198	0.069258584	1
wormd20150524s41PB826NIC20rt23w06r02	5	NIC20.1538	NIC20	Taiwan	23	5/24/15	2	27.15668163	122	266.226277	0.24201613	0.070264156	0.25991462	0.069258584	1
wormd20150524s41PB826NIC20rt23w06r03	5	NIC20.1538	NIC20	Taiwan	23	5/24/15	3	28.21790612	117	632.361257	0.43128373	0.070264156	0.62076132	0.069258584	1
wormd20150524s41PB826NIC20rt23w06r04	5	NIC20.1538	NIC20	Taiwan	23	5/24/15	4	29.27913061	204	666.149123	0.38160414	0.070264156	0.55072281	0.069258584	1
wormd20150524s41PB826NIC20rt23w06r05	5	NIC20.1538	NIC20	Taiwan	23	5/24/15	5	30.3403551	134	469.044872	0.35727809	0.070264156	0.49185814	0.069258584	1
wormd20150524s41PB826NIC20rt23w06r06	5	NIC20.1538	NIC20	Taiwan	23	5/24/15	6	31.40157959	128	519.037037	0.30376614	0.070264156	0.38532927	0.069258584	1
wormd20150524s41PB826NIC20rt23w06r07	5	NIC20.1538	NIC20	Taiwan	23	5/24/15	7	32.46280408	101	618.510638	0.26383725	0.070264156	0.54063435	0.069258584	1
wormd20150524s41PB826NIC20rt23w06r08	5	NIC20.1538	NIC20	Taiwan	23	5/24/15	8	33.52402857	293	705.886667	0.09535982	0.070264156	0.33163082	0.069258584	1
wormd20150524s41PB826NIC20rt23w06r09	5	NIC20.1538	NIC20	Taiwan	23	5/24/15	9	34.58525306	293	574.983333	0.07199581	0.070264156	0.07202685	0.069258584	0
wormd20150524s41PB826NIC20rt23w06r10	5	NIC20.1538	NIC20	Taiwan	23	5/24/15	10	35.64647755	293	585.09	0.07428662	0.070264156	0.0845281	0.069258584	0
wormd20150524s41PB826NIC20rt23w06r11	5	NIC20.1538	NIC20	Taiwan	23	5/24/15	11	36.70770204	293	583.603333	0.07443898	0.070264156	0.07437747	0.069258584	0
wormd20150524s41PB826NIC20rt23w06r12	5	NIC20.1538	NIC20	Taiwan	23	5/24/15	12	37.76892653	293	592.126667	0.07026416	0.070264156	0.06925858	0.069258584	0
wormd20150524s41PB826NIC20rt23w06r13	5	NIC20.1538	NIC20	Taiwan	23	5/24/15	13	38.83015102	293	633.033333	0.07306576	0.070264156	0.07323619	0.069258584	0
wormd20150524s41PB826NIC20rt23w06r14	5	NIC20.1538	NIC20	Taiwan	23	5/24/15	14	39.89137551	293	655.373333	0.07395911	0.070264156	0.07420813	0.069258584	0
wormd20150524s41PB826NIC20rt23w06r15	5	NIC20.1538	NIC20	Taiwan	23	5/24/15	15	40.9526	293	658.763333	0.07063501	0.070264156	0.07064884	0.069258584	0
wormd20150524s41PB826NIC20rt23w10r00	9	NIC20.1539	NIC20	Taiwan	23	5/24/15	0	25.03423265	229	601.090129	0.52194183	0.078893397	0.53456562	0.079636845	1
wormd20150524s41PB826NIC20rt23w10r08	9	NIC20.1539	NIC20	Taiwan	23	5/24/15	8	33.52402857	160	582.962025	0.14425001	0.078893397	0.50103545	0.079636845	1
wormd20150524s41PB826NIC20rt23w10r09	9	NIC20.1539	NIC20	Taiwan	23	5/24/15	9	34.58525306	293	503.39	0.09122635	0.078893397	0.11641181	0.079636845	0
wormd20150524s41PB826NIC20rt23w10r10	9	NIC20.1539	NIC20	Taiwan	23	5/24/15	10	35.64647755	293	511.283333	0.08725982	0.078893397	0.10100591	0.079636845	0
wormd20150524s41PB826NIC20rt23w10r11	9	NIC20.1539	NIC20	Taiwan	23	5/24/15	11	36.70770204	293	513.8	0.08450196	0.078893397	0.08365507	0.079636845	0
wormd20150524s41PB826NIC20rt23w10r12	9	NIC20.1539	NIC20	Taiwan	23	5/24/15	12	37.76892653	293	503.603333	0.08475938	0.078893397	0.08456725	0.079636845	0
wormd20150524s41PB826NIC20rt23w10r13	9	NIC20.1539	NIC20	Taiwan	23	5/24/15	13	38.83015102	293	477.653333	0.08566215	0.078893397	0.08620849	0.079636845	0
wormd20150524s41PB826NIC20rt23w10r14	9	NIC20.1539	NIC20	Taiwan	23	5/24/15	14	39.89137551	293	500.72	0.08332329	0.078893397	0.08387941	0.079636845	0
wormd20150524s41PB826NIC20rt23w10r15	9	NIC20.1539	NIC20	Taiwan	23	5/24/15	15	40.9526	293	519.173333	0.0788934	0.078893397	0.07963685	0.079636845	0
wormd20150524s41PB826NIC20rt23w11r00	10	NIC20.1540	NIC20	Taiwan	23	5/24/15	0	25.03423265	198	569.22439	0.54114265	0.068316283	0.6203991	0.069096102	1
wormd20150524s41PB826NIC20rt23w11r08	10	NIC20.1540	NIC20	Taiwan	23	5/24/15	8	33.52402857	230	545.281955	0.18436575	0.068316283	0.68150083	0.069096102	1
wormd20150524s41PB826NIC20rt23w11r09	10	NIC20.1540	NIC20	Taiwan	23	5/24/15	9	34.58525306	293	562.92	0.10063329	0.068316283	0.24536424	0.069096102	1
wormd20150524s41PB826NIC20rt23w11r10	10	NIC20.1540	NIC20	Taiwan	23	5/24/15	10	35.64647755	293	531.34	0.08095223	0.068316283	0.08101262	0.069096102	0
wormd20150524s41PB826NIC20rt23w11r11	10	NIC20.1540	NIC20	Taiwan	23	5/24/15	11	36.70770204	293	524.576667	0.07769246	0.068316283	0.07824619	0.069096102	0
wormd20150524s41PB826NIC20rt23w11r12	10	NIC20.1540	NIC20	Taiwan	23	5/24/15	12	37.76892653	293	525.733333	0.07759808	0.068316283	0.07751337	0.069096102	0
wormd20150524s41PB826NIC20rt23w11r13	10	NIC20.1540	NIC20	Taiwan	23	5/24/15	13	38.83015102	293	522.723333	0.07405801	0.068316283	0.07400615	0.069096102	0
wormd20150524s41PB826NIC20rt23w11r14	10	NIC20.1540	NIC20	Taiwan	23	5/24/15	14	39.89137551	293	512.253333	0.07115155	0.068316283	0.07149548	0.069096102	0
wormd20150524s41PB826NIC20rt23w11r15	10	NIC20.1540	NIC20	Taiwan	23	5/24/15	15	40.9526	293	513.206667	0.06831628	0.068316283	0.0690961	0.069096102	0
wormd20150524s41PB826NIC20rt23w12r00	11	NIC20.1541	NIC20	Taiwan	23	5/24/15	0	25.03423265	285	604.910959	0.47395822	0.074991831	0.53555561	0.074578969	1
wormd20150524s41PB826NIC20rt23w12r03	11	NIC20.1541	NIC20	Taiwan	23	5/24/15	3	28.21790612	212	554.151376	0.52405918	0.074991831	0.65188729	0.074578969	1
wormd20150524s41PB826NIC20rt23w12r05	11	NIC20.1541	NIC20	Taiwan	23	5/24/15	5	30.3403551	103	549.269231	0.29398276	0.074991831	0.52383033	0.074578969	1
wormd20150524s41PB826NIC20rt23w12r06	11	NIC20.1541	NIC20	Taiwan	23	5/24/15	6	31.40157959	219	538.88716	0.32481472	0.074991831	0.71176446	0.074578969	1
wormd20150524s41PB826NIC20rt23w12r14	11	NIC20.1541	NIC20	Taiwan	23	5/24/15	14	39.89137551	290	479.494949	0.07558057	0.074991831	0.07457897	0.074578969	0
wormd20150524s41PB826NIC20rt23w12r15	11	NIC20.1541	NIC20	Taiwan	23	5/24/15	15	40.9526	293	510.976667	0.07499183	0.074991831	0.07483295	0.074578969	0
wormd20150524s41PB826NIC20rt23w16r00	15	NIC20.1542	NIC20	Taiwan	23	5/24/15	0	25.03423265	268	455.101818	0.63381912	0.073138034	0.68722086	0.072870967	1
wormd20150524s41PB826NIC20rt23w16r01	15	NIC20.1542	NIC20	Taiwan	23	5/24/15	1	26.09545714	126	323.345865	0.32055641	0.073138034	0.35616034	0.072870967	1
wormd20150524s41PB826NIC20rt23w16r09	15	NIC20.1542	NIC20	Taiwan	23	5/24/15	9	34.58525306	293	518.223333	0.07675189	0.073138034	0.07882097	0.072870967	0
wormd20150524s41PB826NIC20rt23w16r10	15	NIC20.1542	NIC20	Taiwan	23	5/24/15	10	35.64647755	293	540.96	0.07378359	0.073138034	0.0829775	0.072870967	0
wormd20150524s41PB826NIC20rt23w16r11	15	NIC20.1542	NIC20	Taiwan	23	5/24/15	11	36.70770204	293	519.896667	0.08579249	0.073138034	0.08464272	0.072870967	0
wormd20150524s41PB826NIC20rt23w16r12	15	NIC20.1542	NIC20	Taiwan	23	5/24/15	12	37.76892653	293	469.416667	0.08062975	0.073138034	0.08083801	0.072870967	0
wormd20150524s41PB826NIC20rt23w16r13	15	NIC20.1542	NIC20	Taiwan	23	5/24/15	13	38.83015102	293	472.073333	0.07313803	0.073138034	0.07287097	0.072870967	0
wormd20150524s41PB826NIC20rt23w16r14	15	NIC20.1542	NIC20	Taiwan	23	5/24/15	14	39.89137551	293	450.836667	0.08072692	0.073138034	0.08032859	0.072870967	0
wormd20150524s41PB826NIC20rt23w16r15	15	NIC20.1542	NIC20	Taiwan	23	5/24/15	15	40.9526	293	447.93	0.07799246	0.073138034	0.07863633	0.072870967	0
wormd20150524s41PB826NIC20rt23w17r00	16	NIC20.1543	NIC20	Taiwan	23	5/24/15	0	25.03423265	293	482.473333	0.61755639	0.007995126	0.68977849	0.007935184	1
wormd20150524s41PB826NIC20rt23w17r03	16	NIC20.1543	NIC20	Taiwan	23	5/24/15	3	28.21790612	122	132.944882	0.04460025	0.007995126	0.07153796	0.007935184	0
wormd20150524s41PB826NIC20rt23w17r06	16	NIC20.1543	NIC20	Taiwan	23	5/24/15	6	31.40157959	139	334.719178	0.22917095	0.007995126	0.44923486	0.007935184	1
wormd20150524s41PB826NIC20rt23w17r07	16	NIC20.1543	NIC20	Taiwan	23	5/24/15	7	32.46280408	143	164.641892	0.05828347	0.007995126	0.14139956	0.007935184	1
wormd20150524s41PB826NIC20rt23w17r08	16	NIC20.1543	NIC20	Taiwan	23	5/24/15	8	33.52402857	288	477.128814	0.17304193	0.007995126	0.69697707	0.007935184	1
wormd20150524s41PB826NIC20rt23w17r09	16	NIC20.1543	NIC20	Taiwan	23	5/24/15	9	34.58525306	222	105.694323	0.00799513	0.007995126	0.00793518	0.007935184	0
wormd20150524s41PB826NIC20rt23w17r10	16	NIC20.1543	NIC20	Taiwan	23	5/24/15	10	35.64647755	160	124.34104	0.01334064	0.007995126	0.01774136	0.007935184	0
wormd20150524s41PB826NIC20rt23w17r12	16	NIC20.1543	NIC20	Taiwan	23	5/24/15	12	37.76892653	218	454.377778	0.08561769	0.007995126	0.0844083	0.007935184	0
wormd20150524s41PB826NIC20rt23w17r13	16	NIC20.1543	NIC20	Taiwan	23	5/24/15	13	38.83015102	293	465.916667	0.0855982	0.007995126	0.08516772	0.007935184	0
wormd20150524s41PB826NIC20rt23w17r14	16	NIC20.1543	NIC20	Taiwan	23	5/24/15	14	39.89137551	293	466.933333	0.08561657	0.007995126	0.08560118	0.007935184	0
wormd20150524s41PB826NIC20rt23w17r15	16	NIC20.1543	NIC20	Taiwan	23	5/24/15	15	40.9526	293	467.526667	0.08290029	0.007995126	0.08335182	0.007935184	0
wormd20150524s41PB826NIC20rt23w18r00	17	NIC20.1544	NIC20	Taiwan	23	5/24/15	0	25.03423265	285	524.965517	0.62558881	0.08572741	0.73808698	0.085981509	1
wormd20150524s41PB826NIC20rt23w18r05	17	NIC20.1544	NIC20	Taiwan	23	5/24/15	5	30.3403551	167	551.452941	0.57422622	0.08572741	0.64811225	0.085981509	1
wormd20150524s41PB826NIC20rt23w18r07	17	NIC20.1544	NIC20	Taiwan	23	5/24/15	7	32.46280408	177	561.918033	0.2905095	0.08572741	0.69421209	0.085981509	1
wormd20150524s41PB826NIC20rt23w18r08	17	NIC20.1544	NIC20	Taiwan	23	5/24/15	8	33.52402857	107	464.101695	0.11499188	0.08572741	0.48377013	0.085981509	1
wormd20150524s41PB826NIC20rt23w18r10	17	NIC20.1544	NIC20	Taiwan	23	5/24/15	10	35.64647755	230	583.582278	0.09513525	0.08572741	0.11400857	0.085981509	0
wormd20150524s41PB826NIC20rt23w18r11	17	NIC20.1544	NIC20	Taiwan	23	5/24/15	11	36.70770204	284	609.707904	0.10075198	0.08572741	0.10311974	0.085981509	0
wormd20150524s41PB826NIC20rt23w18r12	17	NIC20.1544	NIC20	Taiwan	23	5/24/15	12	37.76892653	102	525.142857	0.10177164	0.08572741	0.10369285	0.085981509	0
wormd20150524s41PB826NIC20rt23w18r13	17	NIC20.1544	NIC20	Taiwan	23	5/24/15	13	38.83015102	293	592.52	0.10041437	0.08572741	0.10095591	0.085981509	0
wormd20150524s41PB826NIC20rt23w18r14	17	NIC20.1544	NIC20	Taiwan	23	5/24/15	14	39.89137551	293	583.49	0.09912303	0.08572741	0.09894198	0.085981509	0
wormd20150524s41PB826NIC20rt23w18r15	17	NIC20.1544	NIC20	Taiwan	23	5/24/15	15	40.9526	293	596.456667	0.08572741	0.08572741	0.08598151	0.085981509	0
wormd20150525s77NIC20JU1338rt23w01r00	0	NIC20.1554	NIC20	Taiwan	23	5/25/15	0	25.03423265	226	485.582031	0.45815145	0.092719697	0.47375783	0.094735417	1
wormd20150525s77NIC20JU1338rt23w01r01	0	NIC20.1554	NIC20	Taiwan	23	5/25/15	1	26.09545714	270	486.08042	0.50645933	0.092719697	0.57932865	0.094735417	1
wormd20150525s77NIC20JU1338rt23w01r02	0	NIC20.1554	NIC20	Taiwan	23	5/25/15	2	27.15668163	261	457.429104	0.53975929	0.092719697	0.64176317	0.094735417	1
wormd20150525s77NIC20JU1338rt23w01r03	0	NIC20.1554	NIC20	Taiwan	23	5/25/15	3	28.21790612	226	483.543568	0.47329471	0.092719697	0.5985123	0.094735417	1
wormd20150525s77NIC20JU1338rt23w01r04	0	NIC20.1554	NIC20	Taiwan	23	5/25/15	4	29.27913061	182	455.887179	0.44075455	0.092719697	0.58111412	0.094735417	1
wormd20150525s77NIC20JU1338rt23w01r05	0	NIC20.1554	NIC20	Taiwan	23	5/25/15	5	30.3403551	290	449.922559	0.5064342	0.092719697	0.67121239	0.094735417	1
wormd20150525s77NIC20JU1338rt23w01r06	0	NIC20.1554	NIC20	Taiwan	23	5/25/15	6	31.40157959	292	467.250836	0.50102633	0.092719697	0.65353797	0.094735417	1
wormd20150525s77NIC20JU1338rt23w01r07	0	NIC20.1554	NIC20	Taiwan	23	5/25/15	7	32.46280408	293	462.58	0.38779064	0.092719697	0.74480019	0.094735417	1
wormd20150525s77NIC20JU1338rt23w01r08	0	NIC20.1554	NIC20	Taiwan	23	5/25/15	8	33.52402857	293	454.233333	0.0927197	0.092719697	0.10397928	0.094735417	0
wormd20150525s77NIC20JU1338rt23w01r09	0	NIC20.1554	NIC20	Taiwan	23	5/25/15	9	34.58525306	258	511.984906	0.16816166	0.092719697	0.48090324	0.094735417	1
wormd20150525s77NIC20JU1338rt23w01r11	0	NIC20.1554	NIC20	Taiwan	23	5/25/15	11	36.70770204	100	335.07619	0.09820378	0.092719697	0.10483288	0.094735417	0
wormd20150525s77NIC20JU1338rt23w01r15	0	NIC20.1554	NIC20	Taiwan	23	5/25/15	15	40.9526	144	335.582781	0.0934472	0.092719697	0.09473542	0.094735417	0
wormd20150525s77NIC20JU1338rt23w02r00	1	NIC20.1555	NIC20	Taiwan	23	5/25/15	0	25.03423265	119	408.941667	0.50738578	0.091660951	0.55851983	0.092673974	1
wormd20150525s77NIC20JU1338rt23w02r01	1	NIC20.1555	NIC20	Taiwan	23	5/25/15	1	26.09545714	123	421.983871	0.47198203	0.091660951	0.52178876	0.092673974	1
wormd20150525s77NIC20JU1338rt23w02r05	1	NIC20.1555	NIC20	Taiwan	23	5/25/15	5	30.3403551	253	468.886275	0.47132659	0.091660951	0.60648924	0.092673974	1
wormd20150525s77NIC20JU1338rt23w02r06	1	NIC20.1555	NIC20	Taiwan	23	5/25/15	6	31.40157959	105	478.973214	0.52361696	0.091660951	0.61553971	0.092673974	1
wormd20150525s77NIC20JU1338rt23w02r08	1	NIC20.1555	NIC20	Taiwan	23	5/25/15	8	33.52402857	129	396.932099	0.32050111	0.091660951	0.8079309	0.092673974	1
wormd20150525s77NIC20JU1338rt23w02r09	1	NIC20.1555	NIC20	Taiwan	23	5/25/15	9	34.58525306	293	368.093333	0.10113064	0.091660951	0.11031183	0.092673974	0
wormd20150525s77NIC20JU1338rt23w02r10	1	NIC20.1555	NIC20	Taiwan	23	5/25/15	10	35.64647755	293	371.343333	0.10159866	0.091660951	0.11728279	0.092673974	0
wormd20150525s77NIC20JU1338rt23w02r11	1	NIC20.1555	NIC20	Taiwan	23	5/25/15	11	36.70770204	293	363.616667	0.09904201	0.091660951	0.09968663	0.092673974	0
wormd20150525s77NIC20JU1338rt23w02r12	1	NIC20.1555	NIC20	Taiwan	23	5/25/15	12	37.76892653	293	366.426667	0.09774941	0.091660951	0.09764618	0.092673974	0
wormd20150525s77NIC20JU1338rt23w02r13	1	NIC20.1555	NIC20	Taiwan	23	5/25/15	13	38.83015102	293	347.176667	0.10264767	0.091660951	0.10310747	0.092673974	0
wormd20150525s77NIC20JU1338rt23w02r14	1	NIC20.1555	NIC20	Taiwan	23	5/25/15	14	39.89137551	293	327.473333	0.10371562	0.091660951	0.10336088	0.092673974	0
wormd20150525s77NIC20JU1338rt23w02r15	1	NIC20.1555	NIC20	Taiwan	23	5/25/15	15	40.9526	293	336.273333	0.09166095	0.091660951	0.09267397	0.092673974	0
wormd20150525s77NIC20JU1338rt23w03r00	2	NIC20.1556	NIC20	Taiwan	23	5/25/15	0	25.03423265	290	601.690236	0.4956079	0.046670239	0.65110726	0.047621063	1
wormd20150525s77NIC20JU1338rt23w03r02	2	NIC20.1556	NIC20	Taiwan	23	5/25/15	2	27.15668163	212	373.179167	0.0504979	0.046670239	0.04960441	0.047621063	0
wormd20150525s77NIC20JU1338rt23w03r03	2	NIC20.1556	NIC20	Taiwan	23	5/25/15	3	28.21790612	259	372.139098	0.04795229	0.046670239	0.0479334	0.047621063	0
wormd20150525s77NIC20JU1338rt23w03r04	2	NIC20.1556	NIC20	Taiwan	23	5/25/15	4	29.27913061	236	374.628099	0.04899087	0.046670239	0.0491463	0.047621063	0
wormd20150525s77NIC20JU1338rt23w03r05	2	NIC20.1556	NIC20	Taiwan	23	5/25/15	5	30.3403551	247	375.102362	0.0474155	0.046670239	0.04762106	0.047621063	0
wormd20150525s77NIC20JU1338rt23w03r06	2	NIC20.1556	NIC20	Taiwan	23	5/25/15	6	31.40157959	212	376.227642	0.04667024	0.046670239	0.04764004	0.047621063	0
wormd20150525s77NIC20JU1338rt23w03r07	2	NIC20.1556	NIC20	Taiwan	23	5/25/15	7	32.46280408	263	378.588889	0.04777568	0.046670239	0.04806331	0.047621063	0
wormd20150525s77NIC20JU1338rt23w03r09	2	NIC20.1556	NIC20	Taiwan	23	5/25/15	9	34.58525306	253	600.580882	0.09084084	0.046670239	0.30046606	0.047621063	1
wormd20150525s77NIC20JU1338rt23w03r10	2	NIC20.1556	NIC20	Taiwan	23	5/25/15	10	35.64647755	293	598.22	0.07764824	0.046670239	0.07825963	0.047621063	0
wormd20150525s77NIC20JU1338rt23w03r11	2	NIC20.1556	NIC20	Taiwan	23	5/25/15	11	36.70770204	293	590.71	0.07620288	0.046670239	0.07713444	0.047621063	0
wormd20150525s77NIC20JU1338rt23w03r12	2	NIC20.1556	NIC20	Taiwan	23	5/25/15	12	37.76892653	293	576.56	0.07787494	0.046670239	0.07754602	0.047621063	0
wormd20150525s77NIC20JU1338rt23w03r13	2	NIC20.1556	NIC20	Taiwan	23	5/25/15	13	38.83015102	293	566.77	0.07543493	0.046670239	0.07573935	0.047621063	0
wormd20150525s77NIC20JU1338rt23w03r14	2	NIC20.1556	NIC20	Taiwan	23	5/25/15	14	39.89137551	293	541.986667	0.07486695	0.046670239	0.07589923	0.047621063	0
wormd20150525s77NIC20JU1338rt23w03r15	2	NIC20.1556	NIC20	Taiwan	23	5/25/15	15	40.9526	293	511.91	0.07715399	0.046670239	0.07773755	0.047621063	0
wormd20150525s77NIC20JU1338rt23w07r00	6	NIC20.1557	NIC20	Taiwan	23	5/25/15	0	25.03423265	236	154.012346	0.10207301	0.082549042	0.09654268	0.083298683	0
wormd20150525s77NIC20JU1338rt23w07r01	6	NIC20.1557	NIC20	Taiwan	23	5/25/15	1	26.09545714	183	152.529412	0.14320047	0.082549042	0.14429097	0.083298683	1
wormd20150525s77NIC20JU1338rt23w07r02	6	NIC20.1557	NIC20	Taiwan	23	5/25/15	2	27.15668163	210	462.812207	0.4974799	0.082549042	0.61898345	0.083298683	1
wormd20150525s77NIC20JU1338rt23w07r06	6	NIC20.1557	NIC20	Taiwan	23	5/25/15	6	31.40157959	137	447.625	0.43874806	0.082549042	0.64154011	0.083298683	1
wormd20150525s77NIC20JU1338rt23w07r07	6	NIC20.1557	NIC20	Taiwan	23	5/25/15	7	32.46280408	224	453.922747	0.31955275	0.082549042	0.72834368	0.083298683	1
wormd20150525s77NIC20JU1338rt23w07r08	6	NIC20.1557	NIC20	Taiwan	23	5/25/15	8	33.52402857	290	455.6633	0.22936237	0.082549042	0.70633942	0.083298683	1
wormd20150525s77NIC20JU1338rt23w07r11	6	NIC20.1557	NIC20	Taiwan	23	5/25/15	11	36.70770204	284	406.347079	0.08254904	0.082549042	0.08329868	0.083298683	0
wormd20150525s77NIC20JU1338rt23w07r12	6	NIC20.1557	NIC20	Taiwan	23	5/25/15	12	37.76892653	293	418.363333	0.09224264	0.082549042	0.09211545	0.083298683	0
wormd20150525s77NIC20JU1338rt23w07r13	6	NIC20.1557	NIC20	Taiwan	23	5/25/15	13	38.83015102	293	432.186667	0.10410475	0.082549042	0.10443394	0.083298683	0
wormd20150525s77NIC20JU1338rt23w07r14	6	NIC20.1557	NIC20	Taiwan	23	5/25/15	14	39.89137551	281	424.503472	0.10176225	0.082549042	0.10505469	0.083298683	0
wormd20150525s77NIC20JU1338rt23w08r00	7	NIC20.1558	NIC20	Taiwan	23	5/25/15	0	25.03423265	206	492.052381	0.44468245	0.082585028	0.53502182	0.082246201	1
wormd20150525s77NIC20JU1338rt23w08r02	7	NIC20.1558	NIC20	Taiwan	23	5/25/15	2	27.15668163	283	475.944828	0.43684324	0.082585028	0.54011488	0.082246201	1
wormd20150525s77NIC20JU1338rt23w08r03	7	NIC20.1558	NIC20	Taiwan	23	5/25/15	3	28.21790612	280	468.923345	0.46336368	0.082585028	0.54316903	0.082246201	1
wormd20150525s77NIC20JU1338rt23w08r04	7	NIC20.1558	NIC20	Taiwan	23	5/25/15	4	29.27913061	290	485.447458	0.50261842	0.082585028	0.62972866	0.082246201	1
wormd20150525s77NIC20JU1338rt23w08r05	7	NIC20.1558	NIC20	Taiwan	23	5/25/15	5	30.3403551	267	502.766423	0.52801555	0.082585028	0.60244798	0.082246201	1
wormd20150525s77NIC20JU1338rt23w08r06	7	NIC20.1558	NIC20	Taiwan	23	5/25/15	6	31.40157959	208	498.701754	0.47250775	0.082585028	0.60466447	0.082246201	1
wormd20150525s77NIC20JU1338rt23w08r07	7	NIC20.1558	NIC20	Taiwan	23	5/25/15	7	32.46280408	219	443.230088	0.32620617	0.082585028	0.71808951	0.082246201	1
wormd20150525s77NIC20JU1338rt23w08r08	7	NIC20.1558	NIC20	Taiwan	23	5/25/15	8	33.52402857	281	493.642361	0.20195997	0.082585028	0.62238575	0.082246201	1
wormd20150525s77NIC20JU1338rt23w08r09	7	NIC20.1558	NIC20	Taiwan	23	5/25/15	9	34.58525306	293	476.46	0.15131957	0.082585028	0.56644447	0.082246201	1
wormd20150525s77NIC20JU1338rt23w08r10	7	NIC20.1558	NIC20	Taiwan	23	5/25/15	10	35.64647755	293	493.296667	0.08429762	0.082585028	0.08497153	0.082246201	0
wormd20150525s77NIC20JU1338rt23w08r11	7	NIC20.1558	NIC20	Taiwan	23	5/25/15	11	36.70770204	293	480.84	0.08637728	0.082585028	0.08596083	0.082246201	0
wormd20150525s77NIC20JU1338rt23w08r12	7	NIC20.1558	NIC20	Taiwan	23	5/25/15	12	37.76892653	293	464.78	0.08544091	0.082585028	0.08645319	0.082246201	0
wormd20150525s77NIC20JU1338rt23w08r13	7	NIC20.1558	NIC20	Taiwan	23	5/25/15	13	38.83015102	293	455.643333	0.08258503	0.082585028	0.0822462	0.082246201	0
wormd20150525s77NIC20JU1338rt23w08r14	7	NIC20.1558	NIC20	Taiwan	23	5/25/15	14	39.89137551	293	453.813333	0.0851659	0.082585028	0.08737161	0.082246201	0
wormd20150525s77NIC20JU1338rt23w08r15	7	NIC20.1558	NIC20	Taiwan	23	5/25/15	15	40.9526	293	461.813333	0.08832136	0.082585028	0.08971188	0.082246201	0
wormd20150525s77NIC20JU1338rt23w09r00	8	NIC20.1559	NIC20	Taiwan	23	5/25/15	0	25.03423265	247	506.716535	0.43400717	0.059828946	0.49265058	0.056690325	1
wormd20150525s77NIC20JU1338rt23w09r03	8	NIC20.1559	NIC20	Taiwan	23	5/25/15	3	28.21790612	107	201.781818	0.15385834	0.059828946	0.19532683	0.056690325	1
wormd20150525s77NIC20JU1338rt23w09r04	8	NIC20.1559	NIC20	Taiwan	23	5/25/15	4	29.27913061	147	99.021978	0.05982895	0.059828946	0.05669033	0.056690325	0
wormd20150525s77NIC20JU1338rt23w09r09	8	NIC20.1559	NIC20	Taiwan	23	5/25/15	9	34.58525306	293	474.746667	0.18054789	0.059828946	0.58451494	0.056690325	1
wormd20150525s77NIC20JU1338rt23w09r10	8	NIC20.1559	NIC20	Taiwan	23	5/25/15	10	35.64647755	293	484.956667	0.09270906	0.059828946	0.10215814	0.056690325	0
wormd20150525s77NIC20JU1338rt23w09r11	8	NIC20.1559	NIC20	Taiwan	23	5/25/15	11	36.70770204	293	470.986667	0.09454284	0.059828946	0.09454511	0.056690325	0
wormd20150525s77NIC20JU1338rt23w09r12	8	NIC20.1559	NIC20	Taiwan	23	5/25/15	12	37.76892653	293	461.19	0.09207969	0.059828946	0.09218647	0.056690325	0
wormd20150525s77NIC20JU1338rt23w09r13	8	NIC20.1559	NIC20	Taiwan	23	5/25/15	13	38.83015102	293	445.336667	0.0968746	0.059828946	0.09649664	0.056690325	0
wormd20150525s77NIC20JU1338rt23w09r14	8	NIC20.1559	NIC20	Taiwan	23	5/25/15	14	39.89137551	293	405.603333	0.106234	0.059828946	0.11077758	0.056690325	0
wormd20150525s77NIC20JU1338rt23w09r15	8	NIC20.1559	NIC20	Taiwan	23	5/25/15	15	40.9526	293	444.34	0.09381044	0.059828946	0.09430519	0.056690325	0
wormd20150525s77NIC20JU1338rt23w13r00	12	NIC20.1560	NIC20	Taiwan	23	5/25/15	0	25.03423265	243	416.88	0.40950424	0.105960339	0.44824544	0.106405473	1
wormd20150525s77NIC20JU1338rt23w13r01	12	NIC20.1560	NIC20	Taiwan	23	5/25/15	1	26.09545714	183	519.173684	0.48307767	0.105960339	0.53049903	0.106405473	1
wormd20150525s77NIC20JU1338rt23w13r02	12	NIC20.1560	NIC20	Taiwan	23	5/25/15	2	27.15668163	222	463.606987	0.51263775	0.105960339	0.58630201	0.106405473	1
wormd20150525s77NIC20JU1338rt23w13r03	12	NIC20.1560	NIC20	Taiwan	23	5/25/15	3	28.21790612	205	472.57346	0.52190827	0.105960339	0.58609918	0.106405473	1
wormd20150525s77NIC20JU1338rt23w13r04	12	NIC20.1560	NIC20	Taiwan	23	5/25/15	4	29.27913061	150	475.059211	0.37335124	0.105960339	0.39526247	0.106405473	1
wormd20150525s77NIC20JU1338rt23w13r05	12	NIC20.1560	NIC20	Taiwan	23	5/25/15	5	30.3403551	176	439.143646	0.47435453	0.105960339	0.57064039	0.106405473	1
wormd20150525s77NIC20JU1338rt23w13r06	12	NIC20.1560	NIC20	Taiwan	23	5/25/15	6	31.40157959	265	461.095588	0.56736294	0.105960339	0.65541493	0.106405473	1
wormd20150525s77NIC20JU1338rt23w13r07	12	NIC20.1560	NIC20	Taiwan	23	5/25/15	7	32.46280408	133	361.604317	0.55042541	0.105960339	0.73226948	0.106405473	1
wormd20150525s77NIC20JU1338rt23w13r08	12	NIC20.1560	NIC20	Taiwan	23	5/25/15	8	33.52402857	246	479.083004	0.29920268	0.105960339	0.75052432	0.106405473	1
wormd20150525s77NIC20JU1338rt23w13r09	12	NIC20.1560	NIC20	Taiwan	23	5/25/15	9	34.58525306	293	558.483333	0.10772493	0.105960339	0.10911713	0.106405473	0
wormd20150525s77NIC20JU1338rt23w13r10	12	NIC20.1560	NIC20	Taiwan	23	5/25/15	10	35.64647755	293	539.743333	0.114683	0.105960339	0.11633316	0.106405473	0
wormd20150525s77NIC20JU1338rt23w13r11	12	NIC20.1560	NIC20	Taiwan	23	5/25/15	11	36.70770204	293	531.28	0.10724652	0.105960339	0.10640547	0.106405473	0
wormd20150525s77NIC20JU1338rt23w13r12	12	NIC20.1560	NIC20	Taiwan	23	5/25/15	12	37.76892653	293	505.143333	0.1113532	0.105960339	0.11916374	0.106405473	0
wormd20150525s77NIC20JU1338rt23w13r13	12	NIC20.1560	NIC20	Taiwan	23	5/25/15	13	38.83015102	293	515.033333	0.12179556	0.105960339	0.12077278	0.106405473	0
wormd20150525s77NIC20JU1338rt23w13r14	12	NIC20.1560	NIC20	Taiwan	23	5/25/15	14	39.89137551	293	511.8	0.11525796	0.105960339	0.11701548	0.106405473	0
wormd20150525s77NIC20JU1338rt23w13r15	12	NIC20.1560	NIC20	Taiwan	23	5/25/15	15	40.9526	293	474.49	0.10596034	0.105960339	0.10717452	0.106405473	0
wormd20150525s77NIC20JU1338rt23w14r00	13	NIC20.1561	NIC20	Taiwan	23	5/25/15	0	25.03423265	269	422.308824	0.60443387	0.092022648	0.68752574	0.091545076	1
wormd20150525s77NIC20JU1338rt23w14r01	13	NIC20.1561	NIC20	Taiwan	23	5/25/15	1	26.09545714	163	294.829412	0.13542366	0.092022648	0.15456724	0.091545076	1
wormd20150525s77NIC20JU1338rt23w14r02	13	NIC20.1561	NIC20	Taiwan	23	5/25/15	2	27.15668163	248	270.549407	0.09202265	0.092022648	0.09154508	0.091545076	0
wormd20150525s77NIC20JU1338rt23w14r03	13	NIC20.1561	NIC20	Taiwan	23	5/25/15	3	28.21790612	263	273.718519	0.09590954	0.092022648	0.09706628	0.091545076	0
wormd20150525s77NIC20JU1338rt23w14r04	13	NIC20.1561	NIC20	Taiwan	23	5/25/15	4	29.27913061	269	253.945055	0.09699638	0.092022648	0.09867121	0.091545076	0
wormd20150525s77NIC20JU1338rt23w14r05	13	NIC20.1561	NIC20	Taiwan	23	5/25/15	5	30.3403551	186	415.575916	0.43187616	0.092022648	0.56292799	0.091545076	1
wormd20150525s77NIC20JU1338rt23w14r06	13	NIC20.1561	NIC20	Taiwan	23	5/25/15	6	31.40157959	265	465.908088	0.46641842	0.092022648	0.62150195	0.091545076	1
wormd20150525s77NIC20JU1338rt23w14r07	13	NIC20.1561	NIC20	Taiwan	23	5/25/15	7	32.46280408	278	414.151408	0.4560558	0.092022648	0.71871414	0.091545076	1
wormd20150525s77NIC20JU1338rt23w14r09	13	NIC20.1561	NIC20	Taiwan	23	5/25/15	9	34.58525306	291	319.718121	0.11618099	0.092022648	0.11859171	0.091545076	0
wormd20150525s77NIC20JU1338rt23w14r10	13	NIC20.1561	NIC20	Taiwan	23	5/25/15	10	35.64647755	165	288.77907	0.11719711	0.092022648	0.26290955	0.091545076	1
wormd20150525s77NIC20JU1338rt23w14r11	13	NIC20.1561	NIC20	Taiwan	23	5/25/15	11	36.70770204	265	229.518382	0.09666849	0.092022648	0.10572575	0.091545076	0
wormd20150525s77NIC20JU1338rt23w14r14	13	NIC20.1561	NIC20	Taiwan	23	5/25/15	14	39.89137551	253	394.841699	0.14875766	0.092022648	0.15448364	0.091545076	1
wormd20150525s77NIC20JU1338rt23w14r15	13	NIC20.1561	NIC20	Taiwan	23	5/25/15	15	40.9526	290	376.636364	0.12269573	0.092022648	0.12311321	0.091545076	0
wormd20150525s77NIC20JU1338rt23w15r00	14	NIC20.1562	NIC20	Taiwan	23	5/25/15	0	25.03423265	199	481.705882	0.53474651	0.094366139	0.63384979	0.09591907	1
wormd20150525s77NIC20JU1338rt23w15r03	14	NIC20.1562	NIC20	Taiwan	23	5/25/15	3	28.21790612	131	437.325714	0.59565413	0.094366139	0.70596707	0.09591907	1
wormd20150525s77NIC20JU1338rt23w15r04	14	NIC20.1562	NIC20	Taiwan	23	5/25/15	4	29.27913061	258	450.837545	0.53020283	0.094366139	0.607765	0.09591907	1
wormd20150525s77NIC20JU1338rt23w15r05	14	NIC20.1562	NIC20	Taiwan	23	5/25/15	5	30.3403551	204	444.970213	0.55175894	0.094366139	0.67436567	0.09591907	1
wormd20150525s77NIC20JU1338rt23w15r06	14	NIC20.1562	NIC20	Taiwan	23	5/25/15	6	31.40157959	216	442.721973	0.52342097	0.094366139	0.61290006	0.09591907	1
wormd20150525s77NIC20JU1338rt23w15r07	14	NIC20.1562	NIC20	Taiwan	23	5/25/15	7	32.46280408	288	435.231293	0.46358112	0.094366139	0.66195529	0.09591907	1
wormd20150525s77NIC20JU1338rt23w15r08	14	NIC20.1562	NIC20	Taiwan	23	5/25/15	8	33.52402857	293	427.386667	0.24152885	0.094366139	0.74855235	0.09591907	1
wormd20150525s77NIC20JU1338rt23w15r09	14	NIC20.1562	NIC20	Taiwan	23	5/25/15	9	34.58525306	293	398.786667	0.09611818	0.094366139	0.10858615	0.09591907	0
wormd20150525s77NIC20JU1338rt23w15r10	14	NIC20.1562	NIC20	Taiwan	23	5/25/15	10	35.64647755	293	388.423333	0.09743515	0.094366139	0.09810486	0.09591907	0
wormd20150525s77NIC20JU1338rt23w15r11	14	NIC20.1562	NIC20	Taiwan	23	5/25/15	11	36.70770204	293	381.906667	0.09596218	0.094366139	0.09628799	0.09591907	0
wormd20150525s77NIC20JU1338rt23w15r12	14	NIC20.1562	NIC20	Taiwan	23	5/25/15	12	37.76892653	293	376.893333	0.09726458	0.094366139	0.09877579	0.09591907	0
wormd20150525s77NIC20JU1338rt23w15r13	14	NIC20.1562	NIC20	Taiwan	23	5/25/15	13	38.83015102	293	369.94	0.09436614	0.094366139	0.09591907	0.09591907	0
wormd20150525s77NIC20JU1338rt23w15r14	14	NIC20.1562	NIC20	Taiwan	23	5/25/15	14	39.89137551	293	364.426667	0.09802462	0.094366139	0.09837586	0.09591907	0
wormd20150525s77NIC20JU1338rt23w15r15	14	NIC20.1562	NIC20	Taiwan	23	5/25/15	15	40.9526	293	340.41	0.10171489	0.094366139	0.1039586	0.09591907	0
wormd20150526s78NIC20VX0034rt23w01r00	0	NIC20.1589	NIC20	Taiwan	23	5/26/15	0	25.03423265	216	486.179372	0.56896777	0.048059097	0.62819258	0.050157333	1
wormd20150526s78NIC20VX0034rt23w01r01	0	NIC20.1589	NIC20	Taiwan	23	5/26/15	1	26.09545714	178	458.381215	0.51915455	0.048059097	0.58724226	0.050157333	1
wormd20150526s78NIC20VX0034rt23w01r03	0	NIC20.1589	NIC20	Taiwan	23	5/26/15	3	28.21790612	106	368.920354	0.42161102	0.048059097	0.54192957	0.050157333	1
wormd20150526s78NIC20VX0034rt23w01r04	0	NIC20.1589	NIC20	Taiwan	23	5/26/15	4	29.27913061	114	315.033613	0.37703215	0.048059097	0.47822502	0.050157333	1
wormd20150526s78NIC20VX0034rt23w01r06	0	NIC20.1589	NIC20	Taiwan	23	5/26/15	6	31.40157959	104	267.495413	0.24842633	0.048059097	0.32983798	0.050157333	1
wormd20150526s78NIC20VX0034rt23w01r10	0	NIC20.1589	NIC20	Taiwan	23	5/26/15	10	35.64647755	141	529.239726	0.05709373	0.048059097	0.0914127	0.050157333	0
wormd20150526s78NIC20VX0034rt23w01r13	0	NIC20.1589	NIC20	Taiwan	23	5/26/15	13	38.83015102	111	757.020548	0.0480591	0.048059097	0.05015733	0.050157333	0
wormd20150526s78NIC20VX0034rt23w02r00	1	NIC20.1590	NIC20	Taiwan	23	5/26/15	0	25.03423265	154	445.35443	0.30954271	0.072003875	0.35648972	0.074240622	1
wormd20150526s78NIC20VX0034rt23w02r01	1	NIC20.1590	NIC20	Taiwan	23	5/26/15	1	26.09545714	143	430.802721	0.35956093	0.072003875	0.41615957	0.074240622	1
wormd20150526s78NIC20VX0034rt23w02r05	1	NIC20.1590	NIC20	Taiwan	23	5/26/15	5	30.3403551	142	217.766871	0.20354257	0.072003875	0.25869557	0.074240622	1
wormd20150526s78NIC20VX0034rt23w02r11	1	NIC20.1590	NIC20	Taiwan	23	5/26/15	11	36.70770204	106	479.669725	0.14849377	0.072003875	0.15146054	0.074240622	1
wormd20150526s78NIC20VX0034rt23w02r12	1	NIC20.1590	NIC20	Taiwan	23	5/26/15	12	37.76892653	148	336.137255	0.07200387	0.072003875	0.07424062	0.074240622	0
wormd20150526s78NIC20VX0034rt23w03r00	2	NIC20.1591	NIC20	Taiwan	23	5/26/15	0	25.03423265	146	486.228758	0.49644186	0.084796575	0.5328179	0.084728021	1
wormd20150526s78NIC20VX0034rt23w03r02	2	NIC20.1591	NIC20	Taiwan	23	5/26/15	2	27.15668163	197	469.465686	0.52845428	0.084796575	0.5741435	0.084728021	1
wormd20150526s78NIC20VX0034rt23w03r03	2	NIC20.1591	NIC20	Taiwan	23	5/26/15	3	28.21790612	188	494.152074	0.5543068	0.084796575	0.65866148	0.084728021	1
wormd20150526s78NIC20VX0034rt23w03r04	2	NIC20.1591	NIC20	Taiwan	23	5/26/15	4	29.27913061	124	533.331461	0.51777716	0.084796575	0.69810172	0.084728021	1
wormd20150526s78NIC20VX0034rt23w03r06	2	NIC20.1591	NIC20	Taiwan	23	5/26/15	6	31.40157959	211	480.957529	0.52766828	0.084796575	0.67760964	0.084728021	1
wormd20150526s78NIC20VX0034rt23w03r08	2	NIC20.1591	NIC20	Taiwan	23	5/26/15	8	33.52402857	293	490.876667	0.19196788	0.084796575	0.6665664	0.084728021	1
wormd20150526s78NIC20VX0034rt23w03r09	2	NIC20.1591	NIC20	Taiwan	23	5/26/15	9	34.58525306	293	430.06	0.08738364	0.084796575	0.08783608	0.084728021	0
wormd20150526s78NIC20VX0034rt23w03r10	2	NIC20.1591	NIC20	Taiwan	23	5/26/15	10	35.64647755	293	422.49	0.08889135	0.084796575	0.08957944	0.084728021	0
wormd20150526s78NIC20VX0034rt23w03r11	2	NIC20.1591	NIC20	Taiwan	23	5/26/15	11	36.70770204	293	413.523333	0.08896196	0.084796575	0.09023893	0.084728021	0
wormd20150526s78NIC20VX0034rt23w03r12	2	NIC20.1591	NIC20	Taiwan	23	5/26/15	12	37.76892653	293	401.41	0.08479658	0.084796575	0.08472802	0.084728021	0
wormd20150526s78NIC20VX0034rt23w03r13	2	NIC20.1591	NIC20	Taiwan	23	5/26/15	13	38.83015102	293	391.306667	0.08664114	0.084796575	0.08774413	0.084728021	0
wormd20150526s78NIC20VX0034rt23w03r14	2	NIC20.1591	NIC20	Taiwan	23	5/26/15	14	39.89137551	293	396.013333	0.09065185	0.084796575	0.09042749	0.084728021	0
wormd20150526s78NIC20VX0034rt23w03r15	2	NIC20.1591	NIC20	Taiwan	23	5/26/15	15	40.9526	293	394.85	0.08970769	0.084796575	0.09040143	0.084728021	0
wormd20150526s78NIC20VX0034rt23w07r00	6	NIC20.1592	NIC20	Taiwan	23	5/26/15	0	25.03423265	292	410.123746	0.5651756	0.067734569	0.59132238	0.067888021	1
wormd20150526s78NIC20VX0034rt23w07r01	6	NIC20.1592	NIC20	Taiwan	23	5/26/15	1	26.09545714	289	418.233108	0.56355076	0.067734569	0.61414776	0.067888021	1
wormd20150526s78NIC20VX0034rt23w07r02	6	NIC20.1592	NIC20	Taiwan	23	5/26/15	2	27.15668163	124	223.044444	0.21510089	0.067734569	0.22598877	0.067888021	1
wormd20150526s78NIC20VX0034rt23w07r03	6	NIC20.1592	NIC20	Taiwan	23	5/26/15	3	28.21790612	287	381.363946	0.5976633	0.067734569	0.67644941	0.067888021	1
wormd20150526s78NIC20VX0034rt23w07r04	6	NIC20.1592	NIC20	Taiwan	23	5/26/15	4	29.27913061	148	426.072727	0.5290375	0.067734569	0.63655185	0.067888021	1
wormd20150526s78NIC20VX0034rt23w07r05	6	NIC20.1592	NIC20	Taiwan	23	5/26/15	5	30.3403551	243	446.32	0.54386833	0.067734569	0.68353198	0.067888021	1
wormd20150526s78NIC20VX0034rt23w07r08	6	NIC20.1592	NIC20	Taiwan	23	5/26/15	8	33.52402857	235	408.925	0.27237406	0.067734569	0.77302133	0.067888021	1
wormd20150526s78NIC20VX0034rt23w07r09	6	NIC20.1592	NIC20	Taiwan	23	5/26/15	9	34.58525306	104	417.186916	0.08394995	0.067734569	0.08593107	0.067888021	0
wormd20150526s78NIC20VX0034rt23w07r10	6	NIC20.1592	NIC20	Taiwan	23	5/26/15	10	35.64647755	248	407.780876	0.07407353	0.067734569	0.09037119	0.067888021	0
wormd20150526s78NIC20VX0034rt23w07r11	6	NIC20.1592	NIC20	Taiwan	23	5/26/15	11	36.70770204	272	377.208029	0.07537265	0.067734569	0.08114446	0.067888021	0
wormd20150526s78NIC20VX0034rt23w07r12	6	NIC20.1592	NIC20	Taiwan	23	5/26/15	12	37.76892653	293	385.88	0.07511711	0.067734569	0.07803458	0.067888021	0
wormd20150526s78NIC20VX0034rt23w07r13	6	NIC20.1592	NIC20	Taiwan	23	5/26/15	13	38.83015102	276	389.145763	0.06773457	0.067734569	0.06788802	0.067888021	0
wormd20150526s78NIC20VX0034rt23w07r14	6	NIC20.1592	NIC20	Taiwan	23	5/26/15	14	39.89137551	206	374.053004	0.0936319	0.067734569	0.09136004	0.067888021	0
wormd20150526s78NIC20VX0034rt23w07r15	6	NIC20.1592	NIC20	Taiwan	23	5/26/15	15	40.9526	280	360.289116	0.07486024	0.067734569	0.07459576	0.067888021	0
wormd20150526s78NIC20VX0034rt23w08r00	7	NIC20.1593	NIC20	Taiwan	23	5/26/15	0	25.03423265	211	501.582569	0.41144823	0.073725642	0.41769954	0.075410159	1
wormd20150526s78NIC20VX0034rt23w08r01	7	NIC20.1593	NIC20	Taiwan	23	5/26/15	1	26.09545714	253	575.840467	0.42991755	0.073725642	0.49128146	0.075410159	1
wormd20150526s78NIC20VX0034rt23w08r02	7	NIC20.1593	NIC20	Taiwan	23	5/26/15	2	27.15668163	271	574.580292	0.43809013	0.073725642	0.52400173	0.075410159	1
wormd20150526s78NIC20VX0034rt23w08r03	7	NIC20.1593	NIC20	Taiwan	23	5/26/15	3	28.21790612	117	181.991667	0.23752728	0.073725642	0.26885869	0.075410159	1
wormd20150526s78NIC20VX0034rt23w08r05	7	NIC20.1593	NIC20	Taiwan	23	5/26/15	5	30.3403551	104	526.733333	0.36831752	0.073725642	0.55901521	0.075410159	1
wormd20150526s78NIC20VX0034rt23w08r06	7	NIC20.1593	NIC20	Taiwan	23	5/26/15	6	31.40157959	133	510.478873	0.29224912	0.073725642	0.5856996	0.075410159	1
wormd20150526s78NIC20VX0034rt23w08r07	7	NIC20.1593	NIC20	Taiwan	23	5/26/15	7	32.46280408	111	328.085938	0.13514931	0.073725642	0.30246622	0.075410159	1
wormd20150526s78NIC20VX0034rt23w08r09	7	NIC20.1593	NIC20	Taiwan	23	5/26/15	9	34.58525306	176	503.945652	0.0897188	0.073725642	0.1293395	0.075410159	0
wormd20150526s78NIC20VX0034rt23w08r13	7	NIC20.1593	NIC20	Taiwan	23	5/26/15	13	38.83015102	107	460.679558	0.07372564	0.073725642	0.07541016	0.075410159	0
wormd20150526s78NIC20VX0034rt23w09r00	8	NIC20.1594	NIC20	Taiwan	23	5/26/15	0	25.03423265	287	562.054422	0.50686707	0.070007399	0.58312889	0.07030432	1
wormd20150526s78NIC20VX0034rt23w09r01	8	NIC20.1594	NIC20	Taiwan	23	5/26/15	1	26.09545714	293	588.723333	0.46728092	0.070007399	0.59201322	0.07030432	1
wormd20150526s78NIC20VX0034rt23w09r02	8	NIC20.1594	NIC20	Taiwan	23	5/26/15	2	27.15668163	224	552.759825	0.3848023	0.070007399	0.48632876	0.07030432	1
wormd20150526s78NIC20VX0034rt23w09r06	8	NIC20.1594	NIC20	Taiwan	23	5/26/15	6	31.40157959	131	564.446009	0.36634562	0.070007399	0.7004741	0.07030432	1
wormd20150526s78NIC20VX0034rt23w09r07	8	NIC20.1594	NIC20	Taiwan	23	5/26/15	7	32.46280408	252	553.05814	0.25583632	0.070007399	0.69726578	0.07030432	1
wormd20150526s78NIC20VX0034rt23w09r09	8	NIC20.1594	NIC20	Taiwan	23	5/26/15	9	34.58525306	293	537.34	0.10891391	0.070007399	0.42704206	0.07030432	1
wormd20150526s78NIC20VX0034rt23w09r10	8	NIC20.1594	NIC20	Taiwan	23	5/26/15	10	35.64647755	293	581.82	0.07061565	0.070007399	0.07072341	0.07030432	0
wormd20150526s78NIC20VX0034rt23w09r11	8	NIC20.1594	NIC20	Taiwan	23	5/26/15	11	36.70770204	293	570.616667	0.07225678	0.070007399	0.07278335	0.07030432	0
wormd20150526s78NIC20VX0034rt23w09r12	8	NIC20.1594	NIC20	Taiwan	23	5/26/15	12	37.76892653	293	558.836667	0.07075296	0.070007399	0.07060928	0.07030432	0
wormd20150526s78NIC20VX0034rt23w09r13	8	NIC20.1594	NIC20	Taiwan	23	5/26/15	13	38.83015102	293	533.623333	0.07266222	0.070007399	0.07348858	0.07030432	0
wormd20150526s78NIC20VX0034rt23w09r14	8	NIC20.1594	NIC20	Taiwan	23	5/26/15	14	39.89137551	293	509.85	0.0700074	0.070007399	0.07030432	0.07030432	0
wormd20150526s78NIC20VX0034rt23w09r15	8	NIC20.1594	NIC20	Taiwan	23	5/26/15	15	40.9526	293	510.81	0.07082906	0.070007399	0.0716061	0.07030432	0
wormd20150526s78NIC20VX0034rt23w13r00	12	NIC20.1595	NIC20	Taiwan	23	5/26/15	0	25.03423265	292	571.458194	0.50176208	0.080682441	0.56788399	0.081189714	1
wormd20150526s78NIC20VX0034rt23w13r01	12	NIC20.1595	NIC20	Taiwan	23	5/26/15	1	26.09545714	223	615.876596	0.48823337	0.080682441	0.57739454	0.081189714	1
wormd20150526s78NIC20VX0034rt23w13r02	12	NIC20.1595	NIC20	Taiwan	23	5/26/15	2	27.15668163	139	430.518072	0.35574238	0.080682441	0.44396558	0.081189714	1
wormd20150526s78NIC20VX0034rt23w13r03	12	NIC20.1595	NIC20	Taiwan	23	5/26/15	3	28.21790612	147	499.284768	0.54026092	0.080682441	0.62445841	0.081189714	1
wormd20150526s78NIC20VX0034rt23w13r05	12	NIC20.1595	NIC20	Taiwan	23	5/26/15	5	30.3403551	144	536.283784	0.41426295	0.080682441	0.65957543	0.081189714	1
wormd20150526s78NIC20VX0034rt23w13r06	12	NIC20.1595	NIC20	Taiwan	23	5/26/15	6	31.40157959	147	534.549669	0.40475342	0.080682441	0.58781741	0.081189714	1
wormd20150526s78NIC20VX0034rt23w13r07	12	NIC20.1595	NIC20	Taiwan	23	5/26/15	7	32.46280408	133	536.252632	0.38802167	0.080682441	0.68271417	0.081189714	1
wormd20150526s78NIC20VX0034rt23w13r09	12	NIC20.1595	NIC20	Taiwan	23	5/26/15	9	34.58525306	293	550.39	0.09956303	0.080682441	0.106929	0.081189714	0
wormd20150526s78NIC20VX0034rt23w13r10	12	NIC20.1595	NIC20	Taiwan	23	5/26/15	10	35.64647755	293	535.713333	0.10103274	0.080682441	0.10126284	0.081189714	0
wormd20150526s78NIC20VX0034rt23w13r11	12	NIC20.1595	NIC20	Taiwan	23	5/26/15	11	36.70770204	293	593.253333	0.10764766	0.080682441	0.10808063	0.081189714	0
wormd20150526s78NIC20VX0034rt23w13r12	12	NIC20.1595	NIC20	Taiwan	23	5/26/15	12	37.76892653	293	571.586667	0.09107582	0.080682441	0.09117867	0.081189714	0
wormd20150526s78NIC20VX0034rt23w13r13	12	NIC20.1595	NIC20	Taiwan	23	5/26/15	13	38.83015102	293	564.49	0.08068244	0.080682441	0.08118971	0.081189714	0
wormd20150526s78NIC20VX0034rt23w13r14	12	NIC20.1595	NIC20	Taiwan	23	5/26/15	14	39.89137551	293	576.133333	0.08515778	0.080682441	0.08501386	0.081189714	0
wormd20150526s78NIC20VX0034rt23w13r15	12	NIC20.1595	NIC20	Taiwan	23	5/26/15	15	40.9526	293	572.543333	0.08318642	0.080682441	0.08374345	0.081189714	0
wormd20150526s78NIC20VX0034rt23w14r00	13	NIC20.1596	NIC20	Taiwan	23	5/26/15	0	25.03423265	264	561.501845	0.50138618	0.076165705	0.54887842	0.080925168	1
wormd20150526s78NIC20VX0034rt23w14r01	13	NIC20.1596	NIC20	Taiwan	23	5/26/15	1	26.09545714	165	497.569832	0.45828064	0.076165705	0.52445978	0.080925168	1
wormd20150526s78NIC20VX0034rt23w14r02	13	NIC20.1596	NIC20	Taiwan	23	5/26/15	2	27.15668163	118	547.61194	0.4417687	0.076165705	0.52503402	0.080925168	1
wormd20150526s78NIC20VX0034rt23w14r05	13	NIC20.1596	NIC20	Taiwan	23	5/26/15	5	30.3403551	154	555.05914	0.483638	0.076165705	0.59980253	0.080925168	1
wormd20150526s78NIC20VX0034rt23w14r06	13	NIC20.1596	NIC20	Taiwan	23	5/26/15	6	31.40157959	136	436.779762	0.31198879	0.076165705	0.48947117	0.080925168	1
wormd20150526s78NIC20VX0034rt23w14r07	13	NIC20.1596	NIC20	Taiwan	23	5/26/15	7	32.46280408	138	591.323529	0.29183298	0.076165705	0.65417186	0.080925168	1
wormd20150526s78NIC20VX0034rt23w14r08	13	NIC20.1596	NIC20	Taiwan	23	5/26/15	8	33.52402857	105	569.126984	0.19016179	0.076165705	0.50639526	0.080925168	1
wormd20150526s78NIC20VX0034rt23w14r09	13	NIC20.1596	NIC20	Taiwan	23	5/26/15	9	34.58525306	267	527.839416	0.08529148	0.076165705	0.08780869	0.080925168	0
wormd20150526s78NIC20VX0034rt23w14r10	13	NIC20.1596	NIC20	Taiwan	23	5/26/15	10	35.64647755	293	547.59	0.09105213	0.076165705	0.18892961	0.080925168	1
wormd20150526s78NIC20VX0034rt23w14r11	13	NIC20.1596	NIC20	Taiwan	23	5/26/15	11	36.70770204	292	558.722408	0.08443844	0.076165705	0.09733492	0.080925168	0
wormd20150526s78NIC20VX0034rt23w14r12	13	NIC20.1596	NIC20	Taiwan	23	5/26/15	12	37.76892653	191	562.387755	0.07616571	0.076165705	0.08092517	0.080925168	0
wormd20150526s78NIC20VX0034rt23w14r13	13	NIC20.1596	NIC20	Taiwan	23	5/26/15	13	38.83015102	232	612.209016	0.11135512	0.076165705	0.11740171	0.080925168	0
wormd20150526s78NIC20VX0034rt23w14r14	13	NIC20.1596	NIC20	Taiwan	23	5/26/15	14	39.89137551	261	554.108209	0.08207023	0.076165705	0.08317772	0.080925168	0
wormd20150526s78NIC20VX0034rt23w14r15	13	NIC20.1596	NIC20	Taiwan	23	5/26/15	15	40.9526	235	530.728395	0.07850865	0.076165705	0.08300304	0.080925168	0
wormd20150526s78NIC20VX0034rt23w15r00	14	NIC20.1597	NIC20	Taiwan	23	5/26/15	0	25.03423265	165	163.508772	0.14219621	0.076423325	0.13985912	0.076190493	0
wormd20150526s78NIC20VX0034rt23w15r01	14	NIC20.1597	NIC20	Taiwan	23	5/26/15	1	26.09545714	121	372.504065	0.42892905	0.076423325	0.59372919	0.076190493	1
wormd20150526s78NIC20VX0034rt23w15r02	14	NIC20.1597	NIC20	Taiwan	23	5/26/15	2	27.15668163	102	345.575472	0.37118333	0.076423325	0.37715385	0.076190493	1
wormd20150526s78NIC20VX0034rt23w15r05	14	NIC20.1597	NIC20	Taiwan	23	5/26/15	5	30.3403551	106	252.713043	0.21014817	0.076423325	0.36777978	0.076190493	1
wormd20150526s78NIC20VX0034rt23w15r14	14	NIC20.1597	NIC20	Taiwan	23	5/26/15	14	39.89137551	130	433.589552	0.07949789	0.076423325	0.0785306	0.076190493	0
wormd20150526s78NIC20VX0034rt23w15r15	14	NIC20.1597	NIC20	Taiwan	23	5/26/15	15	40.9526	293	415.876667	0.07642333	0.076423325	0.07619049	0.076190493	0
wormd20150527s75NIC20JU439rt23w01r00	0	NIC20.1513	NIC20	Taiwan	23	5/27/15	0	25	201	273.854369	0.45269705	0.058234109	0.48391281	0.067771464	1
wormd20150527s75NIC20JU439rt23w01r01	0	NIC20.1513	NIC20	Taiwan	23	5/27/15	1	24	230	272.822785	0.46139301	0.058234109	0.48902469	0.067771464	1
wormd20150527s75NIC20JU439rt23w01r02	0	NIC20.1513	NIC20	Taiwan	23	5/27/15	2	23	200	282.937198	0.48078802	0.058234109	0.54775709	0.067771464	1
wormd20150527s75NIC20JU439rt23w01r03	0	NIC20.1513	NIC20	Taiwan	23	5/27/15	3	22	212	241.211009	0.4168139	0.058234109	0.52617612	0.067771464	1
wormd20150527s75NIC20JU439rt23w01r04	0	NIC20.1513	NIC20	Taiwan	23	5/27/15	4	21	197	320.196078	0.42539361	0.058234109	0.62220446	0.067771464	1
wormd20150527s75NIC20JU439rt23w01r05	0	NIC20.1513	NIC20	Taiwan	23	5/27/15	5	20	272	314.870968	0.32649506	0.058234109	0.67724617	0.067771464	1
wormd20150527s75NIC20JU439rt23w01r06	0	NIC20.1513	NIC20	Taiwan	23	5/27/15	6	19	253	317.676923	0.42013792	0.058234109	0.79406357	0.067771464	1
wormd20150527s75NIC20JU439rt23w01r07	0	NIC20.1513	NIC20	Taiwan	23	5/27/15	7	18	234	292.79668	0.39250224	0.058234109	0.81544825	0.067771464	1
wormd20150527s75NIC20JU439rt23w01r08	0	NIC20.1513	NIC20	Taiwan	23	5/27/15	8	17	292	312.270903	0.27642328	0.058234109	0.71562735	0.067771464	1
wormd20150527s75NIC20JU439rt23w01r09	0	NIC20.1513	NIC20	Taiwan	23	5/27/15	9	16	293	329.516667	0.1065836	0.058234109	0.27164577	0.067771464	1
wormd20150527s75NIC20JU439rt23w01r10	0	NIC20.1513	NIC20	Taiwan	23	5/27/15	10	15	293	338.14	0.11083278	0.058234109	0.27718496	0.067771464	1
wormd20150527s75NIC20JU439rt23w01r11	0	NIC20.1513	NIC20	Taiwan	23	5/27/15	11	14	293	346.553333	0.05823411	0.058234109	0.06777146	0.067771464	0
wormd20150527s75NIC20JU439rt23w01r12	0	NIC20.1513	NIC20	Taiwan	23	5/27/15	12	13	293	339.96	0.06879595	0.058234109	0.07754427	0.067771464	0
wormd20150527s75NIC20JU439rt23w01r13	0	NIC20.1513	NIC20	Taiwan	23	5/27/15	13	12	293	380.913333	0.06901894	0.058234109	0.07507506	0.067771464	0
wormd20150527s75NIC20JU439rt23w01r14	0	NIC20.1513	NIC20	Taiwan	23	5/27/15	14	11	293	332.816667	0.09114581	0.058234109	0.12551205	0.067771464	0
wormd20150527s75NIC20JU439rt23w01r15	0	NIC20.1513	NIC20	Taiwan	23	5/27/15	15	10	293	328.433333	0.1027626	0.058234109	0.10217029	0.067771464	0
wormd20150527s75NIC20JU439rt23w01r16	0	NIC20.1513	NIC20	Taiwan	23	5/27/15	16	9	293	311.69	0.09807244	0.058234109	0.10000159	0.067771464	0
wormd20150527s75NIC20JU439rt23w01r17	0	NIC20.1513	NIC20	Taiwan	23	5/27/15	17	8	293	311.853333	0.08326401	0.058234109	0.08543114	0.067771464	0
wormd20150527s75NIC20JU439rt23w02r00	1	NIC20.1514	NIC20	Taiwan	23	5/27/15	0	25	237	372.893443	0.47122234	0.063198894	0.56412868	0.068315187	1
wormd20150527s75NIC20JU439rt23w02r01	1	NIC20.1514	NIC20	Taiwan	23	5/27/15	1	24	201	360.870192	0.44876197	0.063198894	0.50437322	0.068315187	1
wormd20150527s75NIC20JU439rt23w02r02	1	NIC20.1514	NIC20	Taiwan	23	5/27/15	2	23	265	355.886029	0.48020649	0.063198894	0.53139279	0.068315187	1
wormd20150527s75NIC20JU439rt23w02r03	1	NIC20.1514	NIC20	Taiwan	23	5/27/15	3	22	219	360.361607	0.47464088	0.063198894	0.58631609	0.068315187	1
wormd20150527s75NIC20JU439rt23w02r04	1	NIC20.1514	NIC20	Taiwan	23	5/27/15	4	21	207	358.616822	0.39537608	0.063198894	0.56534069	0.068315187	1
wormd20150527s75NIC20JU439rt23w02r05	1	NIC20.1514	NIC20	Taiwan	23	5/27/15	5	20	225	320.543103	0.43185946	0.063198894	0.65393425	0.068315187	1
wormd20150527s75NIC20JU439rt23w02r06	1	NIC20.1514	NIC20	Taiwan	23	5/27/15	6	19	193	325.33	0.32935919	0.063198894	0.67233985	0.068315187	1
wormd20150527s75NIC20JU439rt23w02r07	1	NIC20.1514	NIC20	Taiwan	23	5/27/15	7	18	179	367.38172	0.32439055	0.063198894	0.68342901	0.068315187	1
wormd20150527s75NIC20JU439rt23w02r08	1	NIC20.1514	NIC20	Taiwan	23	5/27/15	8	17	293	373.32	0.1561585	0.063198894	0.50761979	0.068315187	1
wormd20150527s75NIC20JU439rt23w02r09	1	NIC20.1514	NIC20	Taiwan	23	5/27/15	9	16	293	352.343333	0.12053134	0.063198894	0.28702447	0.068315187	1
wormd20150527s75NIC20JU439rt23w02r10	1	NIC20.1514	NIC20	Taiwan	23	5/27/15	10	15	293	398.193333	0.1033213	0.063198894	0.21413307	0.068315187	1
wormd20150527s75NIC20JU439rt23w02r11	1	NIC20.1514	NIC20	Taiwan	23	5/27/15	11	14	293	377.916667	0.06319889	0.063198894	0.07409533	0.068315187	0
wormd20150527s75NIC20JU439rt23w02r12	1	NIC20.1514	NIC20	Taiwan	23	5/27/15	12	13	293	401.71	0.06511267	0.063198894	0.06831519	0.068315187	0
wormd20150527s75NIC20JU439rt23w02r13	1	NIC20.1514	NIC20	Taiwan	23	5/27/15	13	12	293	401.016667	0.07972399	0.063198894	0.07968879	0.068315187	0
wormd20150527s75NIC20JU439rt23w02r14	1	NIC20.1514	NIC20	Taiwan	23	5/27/15	14	11	293	400.233333	0.09111411	0.063198894	0.09144348	0.068315187	0
wormd20150527s75NIC20JU439rt23w02r15	1	NIC20.1514	NIC20	Taiwan	23	5/27/15	15	10	122	312.088	0.28234949	0.063198894	0.30451495	0.068315187	1
wormd20150527s75NIC20JU439rt23w02r16	1	NIC20.1514	NIC20	Taiwan	23	5/27/15	16	9	273	350.194245	0.0942261	0.063198894	0.09317016	0.068315187	0
wormd20150527s75NIC20JU439rt23w02r17	1	NIC20.1514	NIC20	Taiwan	23	5/27/15	17	8	210	349.722222	0.09542696	0.063198894	0.09295242	0.068315187	0
wormd20150527s75NIC20JU439rt23w03r00	2	NIC20.1515	NIC20	Taiwan	23	5/27/15	0	25	287	493.517007	0.52162828	0.077238262	0.651947	0.080969847	1
wormd20150527s75NIC20JU439rt23w03r01	2	NIC20.1515	NIC20	Taiwan	23	5/27/15	1	24	291	499.020134	0.5005321	0.077238262	0.62293504	0.080969847	1
wormd20150527s75NIC20JU439rt23w03r02	2	NIC20.1515	NIC20	Taiwan	23	5/27/15	2	23	287	506.265306	0.51850483	0.077238262	0.62955742	0.080969847	1
wormd20150527s75NIC20JU439rt23w03r03	2	NIC20.1515	NIC20	Taiwan	23	5/27/15	3	22	289	487.726351	0.49629831	0.077238262	0.60529968	0.080969847	1
wormd20150527s75NIC20JU439rt23w03r04	2	NIC20.1515	NIC20	Taiwan	23	5/27/15	4	21	275	488.564286	0.46391045	0.077238262	0.57323309	0.080969847	1
wormd20150527s75NIC20JU439rt23w03r05	2	NIC20.1515	NIC20	Taiwan	23	5/27/15	5	20	240	519.295547	0.44391091	0.077238262	0.69999637	0.080969847	1
wormd20150527s75NIC20JU439rt23w03r06	2	NIC20.1515	NIC20	Taiwan	23	5/27/15	6	19	284	450.099656	0.40719306	0.077238262	0.71774284	0.080969847	1
wormd20150527s75NIC20JU439rt23w03r07	2	NIC20.1515	NIC20	Taiwan	23	5/27/15	7	18	241	469.732794	0.37024837	0.077238262	0.75979926	0.080969847	1
wormd20150527s75NIC20JU439rt23w03r08	2	NIC20.1515	NIC20	Taiwan	23	5/27/15	8	17	285	508.369863	0.30080557	0.077238262	0.715532	0.080969847	1
wormd20150527s75NIC20JU439rt23w03r09	2	NIC20.1515	NIC20	Taiwan	23	5/27/15	9	16	293	499.676667	0.13189084	0.077238262	0.28234371	0.080969847	1
wormd20150527s75NIC20JU439rt23w03r10	2	NIC20.1515	NIC20	Taiwan	23	5/27/15	10	15	293	497.026667	0.09916261	0.077238262	0.1409294	0.080969847	1
wormd20150527s75NIC20JU439rt23w03r11	2	NIC20.1515	NIC20	Taiwan	23	5/27/15	11	14	287	393.336735	0.08130879	0.077238262	0.09198118	0.080969847	0
wormd20150527s75NIC20JU439rt23w03r12	2	NIC20.1515	NIC20	Taiwan	23	5/27/15	12	13	293	427.923333	0.07723826	0.077238262	0.08111572	0.080969847	0
wormd20150527s75NIC20JU439rt23w03r13	2	NIC20.1515	NIC20	Taiwan	23	5/27/15	13	12	293	445.8	0.07980937	0.077238262	0.08096985	0.080969847	0
wormd20150527s75NIC20JU439rt23w03r14	2	NIC20.1515	NIC20	Taiwan	23	5/27/15	14	11	293	539.096667	0.10006096	0.077238262	0.10766265	0.080969847	0
wormd20150527s75NIC20JU439rt23w03r15	2	NIC20.1515	NIC20	Taiwan	23	5/27/15	15	10	293	542.8	0.10553614	0.077238262	0.10626966	0.080969847	0
wormd20150527s75NIC20JU439rt23w03r16	2	NIC20.1515	NIC20	Taiwan	23	5/27/15	16	9	293	536.873333	0.10769455	0.077238262	0.10746357	0.080969847	0
wormd20150527s75NIC20JU439rt23w03r17	2	NIC20.1515	NIC20	Taiwan	23	5/27/15	17	8	293	542.353333	0.10747092	0.077238262	0.10752126	0.080969847	0
wormd20150527s75NIC20JU439rt23w07r00	6	NIC20.1516	NIC20	Taiwan	23	5/27/15	0	25	247	382.492126	0.51667402	0.058260148	0.57249041	0.06294816	1
wormd20150527s75NIC20JU439rt23w07r01	6	NIC20.1516	NIC20	Taiwan	23	5/27/15	1	24	235	400.268595	0.45738322	0.058260148	0.5289067	0.06294816	1
wormd20150527s75NIC20JU439rt23w07r02	6	NIC20.1516	NIC20	Taiwan	23	5/27/15	2	23	222	429.550661	0.45334501	0.058260148	0.5584807	0.06294816	1
wormd20150527s75NIC20JU439rt23w07r03	6	NIC20.1516	NIC20	Taiwan	23	5/27/15	3	22	282	386.3391	0.3843918	0.058260148	0.76224797	0.06294816	1
wormd20150527s75NIC20JU439rt23w07r04	6	NIC20.1516	NIC20	Taiwan	23	5/27/15	4	21	293	463.29	0.30121139	0.058260148	0.64732098	0.06294816	1
wormd20150527s75NIC20JU439rt23w07r05	6	NIC20.1516	NIC20	Taiwan	23	5/27/15	5	20	147	429.388158	0.28443006	0.058260148	0.70985244	0.06294816	1
wormd20150527s75NIC20JU439rt23w07r06	6	NIC20.1516	NIC20	Taiwan	23	5/27/15	6	19	243	435.556	0.30846377	0.058260148	0.68936003	0.06294816	1
wormd20150527s75NIC20JU439rt23w07r07	6	NIC20.1516	NIC20	Taiwan	23	5/27/15	7	18	122	451.403101	0.13662297	0.058260148	0.49179285	0.06294816	1
wormd20150527s75NIC20JU439rt23w07r08	6	NIC20.1516	NIC20	Taiwan	23	5/27/15	8	17	271	472.258993	0.17011825	0.058260148	0.52958423	0.06294816	1
wormd20150527s75NIC20JU439rt23w07r09	6	NIC20.1516	NIC20	Taiwan	23	5/27/15	9	16	293	462.013333	0.12734282	0.058260148	0.3762499	0.06294816	1
wormd20150527s75NIC20JU439rt23w07r10	6	NIC20.1516	NIC20	Taiwan	23	5/27/15	10	15	293	509.516667	0.07542929	0.058260148	0.11194313	0.06294816	0
wormd20150527s75NIC20JU439rt23w07r11	6	NIC20.1516	NIC20	Taiwan	23	5/27/15	11	14	293	461.556667	0.0603999	0.058260148	0.06350819	0.06294816	0
wormd20150527s75NIC20JU439rt23w07r12	6	NIC20.1516	NIC20	Taiwan	23	5/27/15	12	13	293	458.936667	0.05826015	0.058260148	0.06294816	0.06294816	0
wormd20150527s75NIC20JU439rt23w07r13	6	NIC20.1516	NIC20	Taiwan	23	5/27/15	13	12	293	503.28	0.08851328	0.058260148	0.09223521	0.06294816	0
wormd20150527s75NIC20JU439rt23w07r14	6	NIC20.1516	NIC20	Taiwan	23	5/27/15	14	11	293	535.283333	0.06868863	0.058260148	0.06906039	0.06294816	0
wormd20150527s75NIC20JU439rt23w07r15	6	NIC20.1516	NIC20	Taiwan	23	5/27/15	15	10	293	490.97	0.10213145	0.058260148	0.10235404	0.06294816	0
wormd20150527s75NIC20JU439rt23w07r16	6	NIC20.1516	NIC20	Taiwan	23	5/27/15	16	9	293	419.363333	0.10732033	0.058260148	0.10733793	0.06294816	0
wormd20150527s75NIC20JU439rt23w07r17	6	NIC20.1516	NIC20	Taiwan	23	5/27/15	17	8	293	415.376667	0.10697912	0.058260148	0.10671505	0.06294816	0
wormd20150527s75NIC20JU439rt23w08r00	7	NIC20.1517	NIC20	Taiwan	23	5/27/15	0	25	283	406.843206	0.4267294	0.061800309	0.61647647	0.061496275	1
wormd20150527s75NIC20JU439rt23w08r01	7	NIC20.1517	NIC20	Taiwan	23	5/27/15	1	24	216	459.122172	0.42464368	0.061800309	0.54742624	0.061496275	1
wormd20150527s75NIC20JU439rt23w08r02	7	NIC20.1517	NIC20	Taiwan	23	5/27/15	2	23	278	418.954225	0.33403367	0.061800309	0.56607938	0.061496275	1
wormd20150527s75NIC20JU439rt23w08r03	7	NIC20.1517	NIC20	Taiwan	23	5/27/15	3	22	191	453.13	0.32011965	0.061800309	0.67406452	0.061496275	1
wormd20150527s75NIC20JU439rt23w08r04	7	NIC20.1517	NIC20	Taiwan	23	5/27/15	4	21	163	467.694118	0.36127795	0.061800309	0.595345	0.061496275	1
wormd20150527s75NIC20JU439rt23w08r05	7	NIC20.1517	NIC20	Taiwan	23	5/27/15	5	20	199	390.17561	0.37844882	0.061800309	0.70594883	0.061496275	1
wormd20150527s75NIC20JU439rt23w08r06	7	NIC20.1517	NIC20	Taiwan	23	5/27/15	6	19	253	448.912548	0.19687144	0.061800309	0.67066448	0.061496275	1
wormd20150527s75NIC20JU439rt23w08r07	7	NIC20.1517	NIC20	Taiwan	23	5/27/15	7	18	122	313.945736	0.24637118	0.061800309	0.53070106	0.061496275	1
wormd20150527s75NIC20JU439rt23w08r08	7	NIC20.1517	NIC20	Taiwan	23	5/27/15	8	17	293	391.703333	0.22967581	0.061800309	0.66610575	0.061496275	1
wormd20150527s75NIC20JU439rt23w08r09	7	NIC20.1517	NIC20	Taiwan	23	5/27/15	9	16	293	438.843333	0.09548244	0.061800309	0.1937948	0.061496275	1
wormd20150527s75NIC20JU439rt23w08r10	7	NIC20.1517	NIC20	Taiwan	23	5/27/15	10	15	293	518.29	0.0982331	0.061800309	0.18163394	0.061496275	1
wormd20150527s75NIC20JU439rt23w08r11	7	NIC20.1517	NIC20	Taiwan	23	5/27/15	11	14	293	405.853333	0.06290831	0.061800309	0.07045144	0.061496275	0
wormd20150527s75NIC20JU439rt23w08r12	7	NIC20.1517	NIC20	Taiwan	23	5/27/15	12	13	293	426.636667	0.06490414	0.061800309	0.07530853	0.061496275	0
wormd20150527s75NIC20JU439rt23w08r13	7	NIC20.1517	NIC20	Taiwan	23	5/27/15	13	12	293	488.976667	0.06543757	0.061800309	0.06957602	0.061496275	0
wormd20150527s75NIC20JU439rt23w08r14	7	NIC20.1517	NIC20	Taiwan	23	5/27/15	14	11	293	487.073333	0.06446206	0.061800309	0.06492319	0.061496275	0
wormd20150527s75NIC20JU439rt23w08r15	7	NIC20.1517	NIC20	Taiwan	23	5/27/15	15	10	293	499.796667	0.08709006	0.061800309	0.10928797	0.061496275	0
wormd20150527s75NIC20JU439rt23w08r16	7	NIC20.1517	NIC20	Taiwan	23	5/27/15	16	9	293	465.333333	0.06180031	0.061800309	0.06149628	0.061496275	0
wormd20150527s75NIC20JU439rt23w08r17	7	NIC20.1517	NIC20	Taiwan	23	5/27/15	17	8	293	528.556667	0.08734953	0.061800309	0.08681256	0.061496275	0
wormd20150527s75NIC20JU439rt23w09r00	8	NIC20.1518	NIC20	Taiwan	23	5/27/15	0	25	238	402.959184	0.54798927	0.071961823	0.66291103	0.077539255	1
wormd20150527s75NIC20JU439rt23w09r01	8	NIC20.1518	NIC20	Taiwan	23	5/27/15	1	24	194	371.641414	0.37589015	0.071961823	0.46132015	0.077539255	1
wormd20150527s75NIC20JU439rt23w09r02	8	NIC20.1518	NIC20	Taiwan	23	5/27/15	2	23	226	381.658009	0.26285003	0.071961823	0.44423803	0.077539255	1
wormd20150527s75NIC20JU439rt23w09r03	8	NIC20.1518	NIC20	Taiwan	23	5/27/15	3	22	206	387.336493	0.33634331	0.071961823	0.49618002	0.077539255	1
wormd20150527s75NIC20JU439rt23w09r04	8	NIC20.1518	NIC20	Taiwan	23	5/27/15	4	21	199	402.407767	0.38404446	0.071961823	0.44577588	0.077539255	1
wormd20150527s75NIC20JU439rt23w09r05	8	NIC20.1518	NIC20	Taiwan	23	5/27/15	5	20	278	428.684211	0.25438163	0.071961823	0.6979446	0.077539255	1
wormd20150527s75NIC20JU439rt23w09r06	8	NIC20.1518	NIC20	Taiwan	23	5/27/15	6	19	181	351.968085	0.25956152	0.071961823	0.4896094	0.077539255	1
wormd20150527s75NIC20JU439rt23w09r07	8	NIC20.1518	NIC20	Taiwan	23	5/27/15	7	18	123	359.234375	0.2013433	0.071961823	0.43267881	0.077539255	1
wormd20150527s75NIC20JU439rt23w09r08	8	NIC20.1518	NIC20	Taiwan	23	5/27/15	8	17	204	473.971564	0.31271011	0.071961823	0.72962285	0.077539255	1
wormd20150527s75NIC20JU439rt23w09r09	8	NIC20.1518	NIC20	Taiwan	23	5/27/15	9	16	293	453.043333	0.11253081	0.071961823	0.26631631	0.077539255	1
wormd20150527s75NIC20JU439rt23w09r10	8	NIC20.1518	NIC20	Taiwan	23	5/27/15	10	15	293	456.53	0.11703127	0.071961823	0.21439402	0.077539255	1
wormd20150527s75NIC20JU439rt23w09r11	8	NIC20.1518	NIC20	Taiwan	23	5/27/15	11	14	293	371.033333	0.07196182	0.071961823	0.08159303	0.077539255	0
wormd20150527s75NIC20JU439rt23w09r12	8	NIC20.1518	NIC20	Taiwan	23	5/27/15	12	13	293	399.253333	0.08139922	0.071961823	0.12237899	0.077539255	0
wormd20150527s75NIC20JU439rt23w09r13	8	NIC20.1518	NIC20	Taiwan	23	5/27/15	13	12	293	424.906667	0.07425495	0.071961823	0.07753926	0.077539255	0
wormd20150527s75NIC20JU439rt23w09r15	8	NIC20.1518	NIC20	Taiwan	23	5/27/15	15	10	132	169.906475	0.32393173	0.071961823	0.36858672	0.077539255	1
wormd20150527s75NIC20JU439rt23w09r17	8	NIC20.1518	NIC20	Taiwan	23	5/27/15	17	8	293	405.9	0.10411663	0.071961823	0.10454339	0.077539255	0
wormd20150527s75NIC20JU439rt23w13r00	12	NIC20.1519	NIC20	Taiwan	23	5/27/15	0	25	289	506.871622	0.45696603	0.070463182	0.6541387	0.073501806	1
wormd20150527s75NIC20JU439rt23w13r01	12	NIC20.1519	NIC20	Taiwan	23	5/27/15	1	24	250	521.768627	0.45502848	0.070463182	0.545491	0.073501806	1
wormd20150527s75NIC20JU439rt23w13r02	12	NIC20.1519	NIC20	Taiwan	23	5/27/15	2	23	257	550.185606	0.39421862	0.070463182	0.57345264	0.073501806	1
wormd20150527s75NIC20JU439rt23w13r03	12	NIC20.1519	NIC20	Taiwan	23	5/27/15	3	22	185	489.594872	0.3228271	0.070463182	0.42259198	0.073501806	1
wormd20150527s75NIC20JU439rt23w13r04	12	NIC20.1519	NIC20	Taiwan	23	5/27/15	4	21	252	525.525097	0.35485876	0.070463182	0.57646744	0.073501806	1
wormd20150527s75NIC20JU439rt23w13r05	12	NIC20.1519	NIC20	Taiwan	23	5/27/15	5	20	283	467.655172	0.4218964	0.070463182	0.70664512	0.073501806	1
wormd20150527s75NIC20JU439rt23w13r06	12	NIC20.1519	NIC20	Taiwan	23	5/27/15	6	19	185	532.584211	0.35852102	0.070463182	0.66189386	0.073501806	1
wormd20150527s75NIC20JU439rt23w13r07	12	NIC20.1519	NIC20	Taiwan	23	5/27/15	7	18	167	506.270115	0.30331736	0.070463182	0.6937907	0.073501806	1
wormd20150527s75NIC20JU439rt23w13r08	12	NIC20.1519	NIC20	Taiwan	23	5/27/15	8	17	293	537.493333	0.28774235	0.070463182	0.70187362	0.073501806	1
wormd20150527s75NIC20JU439rt23w13r09	12	NIC20.1519	NIC20	Taiwan	23	5/27/15	9	16	226	592.965368	0.21572246	0.070463182	0.66990163	0.073501806	1
wormd20150527s75NIC20JU439rt23w13r10	12	NIC20.1519	NIC20	Taiwan	23	5/27/15	10	15	243	551.247967	0.09122346	0.070463182	0.15935428	0.073501806	1
wormd20150527s75NIC20JU439rt23w13r11	12	NIC20.1519	NIC20	Taiwan	23	5/27/15	11	14	293	581.87	0.07647633	0.070463182	0.09762662	0.073501806	0
wormd20150527s75NIC20JU439rt23w13r12	12	NIC20.1519	NIC20	Taiwan	23	5/27/15	12	13	287	481.636054	0.07046318	0.070463182	0.07350181	0.073501806	0
wormd20150527s75NIC20JU439rt23w14r00	13	NIC20.1520	NIC20	Taiwan	23	5/27/15	0	25	262	404.732342	0.55988709	0.065299582	0.68259282	0.067375035	1
wormd20150527s75NIC20JU439rt23w14r01	13	NIC20.1520	NIC20	Taiwan	23	5/27/15	1	24	249	383.580392	0.55276755	0.065299582	0.60335018	0.067375035	1
wormd20150527s75NIC20JU439rt23w14r02	13	NIC20.1520	NIC20	Taiwan	23	5/27/15	2	23	287	390.064626	0.43896385	0.065299582	0.64367368	0.067375035	1
wormd20150527s75NIC20JU439rt23w14r03	13	NIC20.1520	NIC20	Taiwan	23	5/27/15	3	22	267	426.708029	0.36772181	0.065299582	0.67032013	0.067375035	1
wormd20150527s75NIC20JU439rt23w14r04	13	NIC20.1520	NIC20	Taiwan	23	5/27/15	4	21	257	422.075758	0.48310504	0.065299582	0.53052147	0.067375035	1
wormd20150527s75NIC20JU439rt23w14r05	13	NIC20.1520	NIC20	Taiwan	23	5/27/15	5	20	245	411.047619	0.44834542	0.065299582	0.55830964	0.067375035	1
wormd20150527s75NIC20JU439rt23w14r06	13	NIC20.1520	NIC20	Taiwan	23	5/27/15	6	19	174	428.928177	0.40469517	0.065299582	0.64292622	0.067375035	1
wormd20150527s75NIC20JU439rt23w14r07	13	NIC20.1520	NIC20	Taiwan	23	5/27/15	7	18	276	418.265018	0.42615946	0.065299582	0.77801593	0.067375035	1
wormd20150527s75NIC20JU439rt23w14r08	13	NIC20.1520	NIC20	Taiwan	23	5/27/15	8	17	124	375.564885	0.29793346	0.065299582	0.65496183	0.067375035	1
wormd20150527s75NIC20JU439rt23w14r09	13	NIC20.1520	NIC20	Taiwan	23	5/27/15	9	16	293	439.606667	0.1607711	0.065299582	0.57471657	0.067375035	1
wormd20150527s75NIC20JU439rt23w14r10	13	NIC20.1520	NIC20	Taiwan	23	5/27/15	10	15	293	418.52	0.09705614	0.065299582	0.16528351	0.067375035	1
wormd20150527s75NIC20JU439rt23w14r11	13	NIC20.1520	NIC20	Taiwan	23	5/27/15	11	14	293	450.16	0.09561816	0.065299582	0.18407704	0.067375035	1
wormd20150527s75NIC20JU439rt23w14r12	13	NIC20.1520	NIC20	Taiwan	23	5/27/15	12	13	293	439.733333	0.06529958	0.065299582	0.06737503	0.067375035	0
wormd20150527s75NIC20JU439rt23w14r13	13	NIC20.1520	NIC20	Taiwan	23	5/27/15	13	12	293	511.573333	0.07669372	0.065299582	0.07685938	0.067375035	0
wormd20150527s75NIC20JU439rt23w15r00	14	NIC20.1521	NIC20	Taiwan	23	5/27/15	0	25	293	449.903333	0.51191599	0.067727657	0.55860514	0.069065693	1
wormd20150527s75NIC20JU439rt23w15r01	14	NIC20.1521	NIC20	Taiwan	23	5/27/15	1	24	279	459.552448	0.45381695	0.067727657	0.58500361	0.069065693	1
wormd20150527s75NIC20JU439rt23w15r02	14	NIC20.1521	NIC20	Taiwan	23	5/27/15	2	23	232	473.142259	0.43849355	0.067727657	0.47117057	0.069065693	1
wormd20150527s75NIC20JU439rt23w15r03	14	NIC20.1521	NIC20	Taiwan	23	5/27/15	3	22	290	467.260135	0.45772332	0.067727657	0.47754222	0.069065693	1
wormd20150527s75NIC20JU439rt23w15r04	14	NIC20.1521	NIC20	Taiwan	23	5/27/15	4	21	240	461.534413	0.45967327	0.067727657	0.59727408	0.069065693	1
wormd20150527s75NIC20JU439rt23w15r05	14	NIC20.1521	NIC20	Taiwan	23	5/27/15	5	20	284	424.329897	0.45548862	0.067727657	0.66596957	0.069065693	1
wormd20150527s75NIC20JU439rt23w15r06	14	NIC20.1521	NIC20	Taiwan	23	5/27/15	6	19	293	432.043333	0.43410534	0.067727657	0.71343395	0.069065693	1
wormd20150527s75NIC20JU439rt23w15r07	14	NIC20.1521	NIC20	Taiwan	23	5/27/15	7	18	134	416.460993	0.23759184	0.067727657	0.55504032	0.069065693	1
wormd20150527s75NIC20JU439rt23w15r08	14	NIC20.1521	NIC20	Taiwan	23	5/27/15	8	17	293	487.28	0.16803042	0.067727657	0.55821458	0.069065693	1
wormd20150527s75NIC20JU439rt23w15r09	14	NIC20.1521	NIC20	Taiwan	23	5/27/15	9	16	293	412.806667	0.1492438	0.067727657	0.38302379	0.069065693	1
wormd20150527s75NIC20JU439rt23w15r10	14	NIC20.1521	NIC20	Taiwan	23	5/27/15	10	15	293	452.813333	0.11161655	0.067727657	0.19482774	0.069065693	1
wormd20150527s75NIC20JU439rt23w15r11	14	NIC20.1521	NIC20	Taiwan	23	5/27/15	11	14	293	467.35	0.09796906	0.067727657	0.13852443	0.069065693	0
wormd20150527s75NIC20JU439rt23w15r12	14	NIC20.1521	NIC20	Taiwan	23	5/27/15	12	13	293	505.32	0.07961119	0.067727657	0.12561818	0.069065693	0
wormd20150527s75NIC20JU439rt23w15r13	14	NIC20.1521	NIC20	Taiwan	23	5/27/15	13	12	293	441.723333	0.06772766	0.067727657	0.06906569	0.069065693	0
wormd20150527s75NIC20JU439rt23w15r14	14	NIC20.1521	NIC20	Taiwan	23	5/27/15	14	11	293	449.083333	0.06955736	0.067727657	0.07033656	0.069065693	0
wormd20150527s75NIC20JU439rt23w15r15	14	NIC20.1521	NIC20	Taiwan	23	5/27/15	15	10	293	611.28	0.08587508	0.067727657	0.08974917	0.069065693	0
wormd20150527s75NIC20JU439rt23w15r16	14	NIC20.1521	NIC20	Taiwan	23	5/27/15	16	9	293	520.46	0.09096585	0.067727657	0.09226548	0.069065693	0
wormd20150527s75NIC20JU439rt23w15r17	14	NIC20.1521	NIC20	Taiwan	23	5/27/15	17	8	293	505.633333	0.09585153	0.067727657	0.09724753	0.069065693	0
wormd20150528s93VX0034NIC20rt23w04r00	3	NIC20.1522	NIC20	Taiwan	23	5/28/15	0	25	243	512.016	0.582801	0.073781318	0.65645758	0.07347788	1
wormd20150528s93VX0034NIC20rt23w04r01	3	NIC20.1522	NIC20	Taiwan	23	5/28/15	1	24	245	490.087302	0.55993149	0.073781318	0.63293933	0.07347788	1
wormd20150528s93VX0034NIC20rt23w04r02	3	NIC20.1522	NIC20	Taiwan	23	5/28/15	2	23	286	503.003436	0.55718447	0.073781318	0.6277567	0.07347788	1
wormd20150528s93VX0034NIC20rt23w04r03	3	NIC20.1522	NIC20	Taiwan	23	5/28/15	3	22	255	520.576923	0.55061982	0.073781318	0.57240614	0.07347788	1
wormd20150528s93VX0034NIC20rt23w04r04	3	NIC20.1522	NIC20	Taiwan	23	5/28/15	4	21	277	518.834507	0.53913728	0.073781318	0.54122226	0.07347788	1
wormd20150528s93VX0034NIC20rt23w04r05	3	NIC20.1522	NIC20	Taiwan	23	5/28/15	5	20	278	515.522807	0.50058259	0.073781318	0.56269395	0.07347788	1
wormd20150528s93VX0034NIC20rt23w04r06	3	NIC20.1522	NIC20	Taiwan	23	5/28/15	6	19	293	487.816667	0.37880158	0.073781318	0.72412284	0.07347788	1
wormd20150528s93VX0034NIC20rt23w04r07	3	NIC20.1522	NIC20	Taiwan	23	5/28/15	7	18	293	506.166667	0.23551055	0.073781318	0.60585087	0.07347788	1
wormd20150528s93VX0034NIC20rt23w04r08	3	NIC20.1522	NIC20	Taiwan	23	5/28/15	8	17	293	499.456667	0.11104364	0.073781318	0.27944124	0.07347788	1
wormd20150528s93VX0034NIC20rt23w04r09	3	NIC20.1522	NIC20	Taiwan	23	5/28/15	9	16	293	491.416667	0.10862693	0.073781318	0.26706967	0.07347788	1
wormd20150528s93VX0034NIC20rt23w04r10	3	NIC20.1522	NIC20	Taiwan	23	5/28/15	10	15	293	501.283333	0.09252079	0.073781318	0.19939379	0.07347788	1
wormd20150528s93VX0034NIC20rt23w04r11	3	NIC20.1522	NIC20	Taiwan	23	5/28/15	11	14	293	482.843333	0.08538489	0.073781318	0.14014004	0.07347788	1
wormd20150528s93VX0034NIC20rt23w04r12	3	NIC20.1522	NIC20	Taiwan	23	5/28/15	12	13	293	484.213333	0.08127149	0.073781318	0.09387844	0.07347788	0
wormd20150528s93VX0034NIC20rt23w04r13	3	NIC20.1522	NIC20	Taiwan	23	5/28/15	13	12	293	472.49	0.07378132	0.073781318	0.07347788	0.07347788	0
wormd20150528s93VX0034NIC20rt23w04r14	3	NIC20.1522	NIC20	Taiwan	23	5/28/15	14	11	293	550.176667	0.09746049	0.073781318	0.1222957	0.07347788	0
wormd20150528s93VX0034NIC20rt23w04r15	3	NIC20.1522	NIC20	Taiwan	23	5/28/15	15	10	187	675.336683	0.14208265	0.073781318	0.14740498	0.07347788	1
wormd20150528s93VX0034NIC20rt23w05r00	4	NIC20.1523	NIC20	Taiwan	23	5/28/15	0	25	213	675.686347	0.39764963	0.055242024	0.5704651	0.055822579	1
wormd20150528s93VX0034NIC20rt23w05r01	4	NIC20.1523	NIC20	Taiwan	23	5/28/15	1	24	293	591.136667	0.39714191	0.055242024	0.61889638	0.055822579	1
wormd20150528s93VX0034NIC20rt23w05r02	4	NIC20.1523	NIC20	Taiwan	23	5/28/15	2	23	282	594.560554	0.40296485	0.055242024	0.60247505	0.055822579	1
wormd20150528s93VX0034NIC20rt23w05r04	4	NIC20.1523	NIC20	Taiwan	23	5/28/15	4	21	189	602.804124	0.26921504	0.055242024	0.63006234	0.055822579	1
wormd20150528s93VX0034NIC20rt23w05r05	4	NIC20.1523	NIC20	Taiwan	23	5/28/15	5	20	278	599.961404	0.34172572	0.055242024	0.4773419	0.055822579	1
wormd20150528s93VX0034NIC20rt23w05r06	4	NIC20.1523	NIC20	Taiwan	23	5/28/15	6	19	173	584.958763	0.2916269	0.055242024	0.5662736	0.055822579	1
wormd20150528s93VX0034NIC20rt23w05r07	4	NIC20.1523	NIC20	Taiwan	23	5/28/15	7	18	223	519.625	0.30295092	0.055242024	0.66466336	0.055822579	1
wormd20150528s93VX0034NIC20rt23w05r08	4	NIC20.1523	NIC20	Taiwan	23	5/28/15	8	17	278	563.814035	0.26437916	0.055242024	0.68917268	0.055822579	1
wormd20150528s93VX0034NIC20rt23w05r09	4	NIC20.1523	NIC20	Taiwan	23	5/28/15	9	16	202	556.645933	0.08259078	0.055242024	0.16173503	0.055822579	1
wormd20150528s93VX0034NIC20rt23w05r10	4	NIC20.1523	NIC20	Taiwan	23	5/28/15	10	15	199	554.668224	0.09790342	0.055242024	0.20178056	0.055822579	1
wormd20150528s93VX0034NIC20rt23w05r11	4	NIC20.1523	NIC20	Taiwan	23	5/28/15	11	14	198	489.321951	0.05945234	0.055242024	0.06243643	0.055822579	0
wormd20150528s93VX0034NIC20rt23w05r12	4	NIC20.1523	NIC20	Taiwan	23	5/28/15	12	13	156	492.930233	0.05524202	0.055242024	0.05582258	0.055822579	0
wormd20150528s93VX0034NIC20rt23w05r13	4	NIC20.1523	NIC20	Taiwan	23	5/28/15	13	12	287	536.52381	0.05602047	0.055242024	0.05667417	0.055822579	0
wormd20150528s93VX0034NIC20rt23w05r14	4	NIC20.1523	NIC20	Taiwan	23	5/28/15	14	11	293	581.78	0.06355494	0.055242024	0.06395908	0.055822579	0
wormd20150528s93VX0034NIC20rt23w06r00	5	NIC20.1524	NIC20	Taiwan	23	5/28/15	0	25	289	480.625	0.56764392	0.037016259	0.71383057	0.051586113	1
wormd20150528s93VX0034NIC20rt23w06r01	5	NIC20.1524	NIC20	Taiwan	23	5/28/15	1	24	282	400.152249	0.63744247	0.037016259	0.73257122	0.051586113	1
wormd20150528s93VX0034NIC20rt23w06r02	5	NIC20.1524	NIC20	Taiwan	23	5/28/15	2	23	292	499.585284	0.54995819	0.037016259	0.67011008	0.051586113	1
wormd20150528s93VX0034NIC20rt23w06r03	5	NIC20.1524	NIC20	Taiwan	23	5/28/15	3	22	276	523.321555	0.52144276	0.037016259	0.60325431	0.051586113	1
wormd20150528s93VX0034NIC20rt23w06r04	5	NIC20.1524	NIC20	Taiwan	23	5/28/15	4	21	290	452.791246	0.58127341	0.037016259	0.63913264	0.051586113	1
wormd20150528s93VX0034NIC20rt23w06r05	5	NIC20.1524	NIC20	Taiwan	23	5/28/15	5	20	293	484.186667	0.44209239	0.037016259	0.66165035	0.051586113	1
wormd20150528s93VX0034NIC20rt23w06r06	5	NIC20.1524	NIC20	Taiwan	23	5/28/15	6	19	292	446.705686	0.50230497	0.037016259	0.6828143	0.051586113	1
wormd20150528s93VX0034NIC20rt23w06r07	5	NIC20.1524	NIC20	Taiwan	23	5/28/15	7	18	293	496.32	0.31004985	0.037016259	0.74619455	0.051586113	1
wormd20150528s93VX0034NIC20rt23w06r08	5	NIC20.1524	NIC20	Taiwan	23	5/28/15	8	17	293	503.596667	0.19055936	0.037016259	0.56867804	0.051586113	1
wormd20150528s93VX0034NIC20rt23w06r09	5	NIC20.1524	NIC20	Taiwan	23	5/28/15	9	16	293	486.546667	0.10653967	0.037016259	0.24452905	0.051586113	1
wormd20150528s93VX0034NIC20rt23w06r10	5	NIC20.1524	NIC20	Taiwan	23	5/28/15	10	15	293	495.81	0.0881118	0.037016259	0.13377167	0.051586113	0
wormd20150528s93VX0034NIC20rt23w06r11	5	NIC20.1524	NIC20	Taiwan	23	5/28/15	11	14	293	495.436667	0.06274789	0.037016259	0.06881294	0.051586113	0
wormd20150528s93VX0034NIC20rt23w06r12	5	NIC20.1524	NIC20	Taiwan	23	5/28/15	12	13	293	490.633333	0.08186307	0.037016259	0.08532287	0.051586113	0
wormd20150528s93VX0034NIC20rt23w06r13	5	NIC20.1524	NIC20	Taiwan	23	5/28/15	13	12	232	601.895397	0.09823126	0.037016259	0.10137005	0.051586113	0
wormd20150528s93VX0034NIC20rt23w06r14	5	NIC20.1524	NIC20	Taiwan	23	5/28/15	14	11	186	85.5421053	0.03701626	0.037016259	0.05158611	0.051586113	0
wormd20150528s93VX0034NIC20rt23w10r00	9	NIC20.1525	NIC20	Taiwan	23	5/28/15	0	25	267	491.627737	0.53041803	0.055554179	0.6048188	0.07347585	1
wormd20150528s93VX0034NIC20rt23w10r01	9	NIC20.1525	NIC20	Taiwan	23	5/28/15	1	24	270	543.740876	0.44563764	0.055554179	0.56857721	0.07347585	1
wormd20150528s93VX0034NIC20rt23w10r02	9	NIC20.1525	NIC20	Taiwan	23	5/28/15	2	23	293	515.536667	0.47266281	0.055554179	0.57157782	0.07347585	1
wormd20150528s93VX0034NIC20rt23w10r03	9	NIC20.1525	NIC20	Taiwan	23	5/28/15	3	22	268	499.978022	0.43816359	0.055554179	0.56255373	0.07347585	1
wormd20150528s93VX0034NIC20rt23w10r04	9	NIC20.1525	NIC20	Taiwan	23	5/28/15	4	21	243	500.196	0.44579635	0.055554179	0.67805053	0.07347585	1
wormd20150528s93VX0034NIC20rt23w10r05	9	NIC20.1525	NIC20	Taiwan	23	5/28/15	5	20	203	499.985646	0.34082577	0.055554179	0.71907017	0.07347585	1
wormd20150528s93VX0034NIC20rt23w10r06	9	NIC20.1525	NIC20	Taiwan	23	5/28/15	6	19	147	491.278481	0.38073924	0.055554179	0.68944155	0.07347585	1
wormd20150528s93VX0034NIC20rt23w10r07	9	NIC20.1525	NIC20	Taiwan	23	5/28/15	7	18	211	470.288991	0.3274136	0.055554179	0.75267829	0.07347585	1
wormd20150528s93VX0034NIC20rt23w10r08	9	NIC20.1525	NIC20	Taiwan	23	5/28/15	8	17	293	531.813333	0.19557262	0.055554179	0.59916015	0.07347585	1
wormd20150528s93VX0034NIC20rt23w10r09	9	NIC20.1525	NIC20	Taiwan	23	5/28/15	9	16	293	492.99	0.10439406	0.055554179	0.27589477	0.07347585	1
wormd20150528s93VX0034NIC20rt23w10r10	9	NIC20.1525	NIC20	Taiwan	23	5/28/15	10	15	293	540.486667	0.07223275	0.055554179	0.19167692	0.07347585	1
wormd20150528s93VX0034NIC20rt23w10r11	9	NIC20.1525	NIC20	Taiwan	23	5/28/15	11	14	293	475.376667	0.05555418	0.055554179	0.08046275	0.07347585	0
wormd20150528s93VX0034NIC20rt23w10r12	9	NIC20.1525	NIC20	Taiwan	23	5/28/15	12	13	293	532.986667	0.06575835	0.055554179	0.11054709	0.07347585	0
wormd20150528s93VX0034NIC20rt23w10r13	9	NIC20.1525	NIC20	Taiwan	23	5/28/15	13	12	293	514.24	0.07372394	0.055554179	0.10621249	0.07347585	0
wormd20150528s93VX0034NIC20rt23w10r14	9	NIC20.1525	NIC20	Taiwan	23	5/28/15	14	11	293	482.533333	0.07272025	0.055554179	0.07347585	0.07347585	0
wormd20150528s93VX0034NIC20rt23w10r15	9	NIC20.1525	NIC20	Taiwan	23	5/28/15	15	10	290	457.494949	0.08247257	0.055554179	0.08294314	0.07347585	0
wormd20150528s93VX0034NIC20rt23w11r00	10	NIC20.1526	NIC20	Taiwan	23	5/28/15	0	25	208	474.818605	0.48248106	0.059519623	0.54026615	0.066559927	1
wormd20150528s93VX0034NIC20rt23w11r01	10	NIC20.1526	NIC20	Taiwan	23	5/28/15	1	24	236	526.082645	0.50693098	0.059519623	0.54980439	0.066559927	1
wormd20150528s93VX0034NIC20rt23w11r02	10	NIC20.1526	NIC20	Taiwan	23	5/28/15	2	23	202	489.784689	0.47354462	0.059519623	0.52075858	0.066559927	1
wormd20150528s93VX0034NIC20rt23w11r04	10	NIC20.1526	NIC20	Taiwan	23	5/28/15	4	21	153	298.18125	0.28939132	0.059519623	0.29321376	0.066559927	1
wormd20150528s93VX0034NIC20rt23w11r05	10	NIC20.1526	NIC20	Taiwan	23	5/28/15	5	20	182	464.12973	0.32383153	0.059519623	0.59185572	0.066559927	1
wormd20150528s93VX0034NIC20rt23w11r06	10	NIC20.1526	NIC20	Taiwan	23	5/28/15	6	19	179	465.412088	0.37565286	0.059519623	0.70983764	0.066559927	1
wormd20150528s93VX0034NIC20rt23w11r07	10	NIC20.1526	NIC20	Taiwan	23	5/28/15	7	18	293	539.28	0.26375006	0.059519623	0.62433907	0.066559927	1
wormd20150528s93VX0034NIC20rt23w11r08	10	NIC20.1526	NIC20	Taiwan	23	5/28/15	8	17	293	518.173333	0.11987923	0.059519623	0.29499156	0.066559927	1
wormd20150528s93VX0034NIC20rt23w11r09	10	NIC20.1526	NIC20	Taiwan	23	5/28/15	9	16	293	547.766667	0.11167928	0.059519623	0.29687074	0.066559927	1
wormd20150528s93VX0034NIC20rt23w11r10	10	NIC20.1526	NIC20	Taiwan	23	5/28/15	10	15	293	507.313333	0.06788403	0.059519623	0.10344611	0.066559927	0
wormd20150528s93VX0034NIC20rt23w11r11	10	NIC20.1526	NIC20	Taiwan	23	5/28/15	11	14	293	524.743333	0.05951962	0.059519623	0.06655993	0.066559927	0
wormd20150528s93VX0034NIC20rt23w11r12	10	NIC20.1526	NIC20	Taiwan	23	5/28/15	12	13	293	537.956667	0.09099037	0.059519623	0.10637147	0.066559927	0
wormd20150528s93VX0034NIC20rt23w11r13	10	NIC20.1526	NIC20	Taiwan	23	5/28/15	13	12	293	546.443333	0.1055908	0.059519623	0.10583026	0.066559927	0
wormd20150528s93VX0034NIC20rt23w11r14	10	NIC20.1526	NIC20	Taiwan	23	5/28/15	14	11	293	691.8	0.11291011	0.059519623	0.11318581	0.066559927	0
wormd20150528s93VX0034NIC20rt23w12r00	11	NIC20.1527	NIC20	Taiwan	23	5/28/15	0	25	276	479.070671	0.48624334	0.050186696	0.59135316	0.050584098	1
wormd20150528s93VX0034NIC20rt23w12r01	11	NIC20.1527	NIC20	Taiwan	23	5/28/15	1	24	293	450.013333	0.47548195	0.050186696	0.66307044	0.050584098	1
wormd20150528s93VX0034NIC20rt23w12r02	11	NIC20.1527	NIC20	Taiwan	23	5/28/15	2	23	290	442.074074	0.42263123	0.050186696	0.60844578	0.050584098	1
wormd20150528s93VX0034NIC20rt23w12r03	11	NIC20.1527	NIC20	Taiwan	23	5/28/15	3	22	293	506.553333	0.38598737	0.050186696	0.58325664	0.050584098	1
wormd20150528s93VX0034NIC20rt23w12r04	11	NIC20.1527	NIC20	Taiwan	23	5/28/15	4	21	293	428.276667	0.47674855	0.050186696	0.61035717	0.050584098	1
wormd20150528s93VX0034NIC20rt23w12r05	11	NIC20.1527	NIC20	Taiwan	23	5/28/15	5	20	293	486.53	0.29510329	0.050186696	0.70522017	0.050584098	1
wormd20150528s93VX0034NIC20rt23w12r06	11	NIC20.1527	NIC20	Taiwan	23	5/28/15	6	19	290	461.057239	0.34772489	0.050186696	0.62474724	0.050584098	1
wormd20150528s93VX0034NIC20rt23w12r07	11	NIC20.1527	NIC20	Taiwan	23	5/28/15	7	18	281	486.759582	0.28922384	0.050186696	0.68608013	0.050584098	1
wormd20150528s93VX0034NIC20rt23w12r08	11	NIC20.1527	NIC20	Taiwan	23	5/28/15	8	17	241	382.03629	0.18751479	0.050186696	0.54831601	0.050584098	1
wormd20150528s93VX0034NIC20rt23w12r09	11	NIC20.1527	NIC20	Taiwan	23	5/28/15	9	16	287	419.877551	0.09825838	0.050186696	0.18821769	0.050584098	1
wormd20150528s93VX0034NIC20rt23w12r10	11	NIC20.1527	NIC20	Taiwan	23	5/28/15	10	15	242	381.193548	0.05946203	0.050186696	0.09115897	0.050584098	0
wormd20150528s93VX0034NIC20rt23w12r11	11	NIC20.1527	NIC20	Taiwan	23	5/28/15	11	14	293	420.583333	0.06454105	0.050186696	0.0944354	0.050584098	0
wormd20150528s93VX0034NIC20rt23w12r12	11	NIC20.1527	NIC20	Taiwan	23	5/28/15	12	13	282	429.67474	0.05897057	0.050186696	0.07725854	0.050584098	0
wormd20150528s93VX0034NIC20rt23w12r13	11	NIC20.1527	NIC20	Taiwan	23	5/28/15	13	12	220	389.837004	0.05071916	0.050186696	0.05335742	0.050584098	0
wormd20150528s93VX0034NIC20rt23w12r14	11	NIC20.1527	NIC20	Taiwan	23	5/28/15	14	11	293	462.05	0.0501867	0.050186696	0.0505841	0.050584098	0
wormd20150528s93VX0034NIC20rt23w12r15	11	NIC20.1527	NIC20	Taiwan	23	5/28/15	15	10	293	466.11	0.06063233	0.050186696	0.0609387	0.050584098	0
wormd20150528s93VX0034NIC20rt23w16r00	15	NIC20.1528	NIC20	Taiwan	23	5/28/15	0	25	269	478.40942	0.602899	0.078766504	0.70757376	0.079345306	1
wormd20150528s93VX0034NIC20rt23w16r01	15	NIC20.1528	NIC20	Taiwan	23	5/28/15	1	24	293	482.94	0.57420885	0.078766504	0.68199308	0.079345306	1
wormd20150528s93VX0034NIC20rt23w16r02	15	NIC20.1528	NIC20	Taiwan	23	5/28/15	2	23	290	452.939394	0.6121139	0.078766504	0.6834162	0.079345306	1
wormd20150528s93VX0034NIC20rt23w16r03	15	NIC20.1528	NIC20	Taiwan	23	5/28/15	3	22	290	492.744108	0.53485324	0.078766504	0.68092976	0.079345306	1
wormd20150528s93VX0034NIC20rt23w16r04	15	NIC20.1528	NIC20	Taiwan	23	5/28/15	4	21	274	456.330961	0.46671045	0.078766504	0.64078552	0.079345306	1
wormd20150528s93VX0034NIC20rt23w16r05	15	NIC20.1528	NIC20	Taiwan	23	5/28/15	5	20	287	505.255102	0.47131541	0.078766504	0.65639418	0.079345306	1
wormd20150528s93VX0034NIC20rt23w16r06	15	NIC20.1528	NIC20	Taiwan	23	5/28/15	6	19	259	459.522556	0.50024568	0.078766504	0.717608	0.079345306	1
wormd20150528s93VX0034NIC20rt23w16r07	15	NIC20.1528	NIC20	Taiwan	23	5/28/15	7	18	251	462.468992	0.36862796	0.078766504	0.7171624	0.079345306	1
wormd20150528s93VX0034NIC20rt23w16r08	15	NIC20.1528	NIC20	Taiwan	23	5/28/15	8	17	293	518.373333	0.18615409	0.078766504	0.55163106	0.079345306	1
wormd20150528s93VX0034NIC20rt23w16r09	15	NIC20.1528	NIC20	Taiwan	23	5/28/15	9	16	293	522.483333	0.1083053	0.078766504	0.27399853	0.079345306	1
wormd20150528s93VX0034NIC20rt23w16r10	15	NIC20.1528	NIC20	Taiwan	23	5/28/15	10	15	293	517.713333	0.09481474	0.078766504	0.17860491	0.079345306	1
wormd20150528s93VX0034NIC20rt23w16r11	15	NIC20.1528	NIC20	Taiwan	23	5/28/15	11	14	293	507.973333	0.08747354	0.078766504	0.09212457	0.079345306	0
wormd20150528s93VX0034NIC20rt23w16r12	15	NIC20.1528	NIC20	Taiwan	23	5/28/15	12	13	293	499.983333	0.091459	0.078766504	0.1358376	0.079345306	0
wormd20150528s93VX0034NIC20rt23w16r13	15	NIC20.1528	NIC20	Taiwan	23	5/28/15	13	12	293	503.85	0.0787665	0.078766504	0.07934531	0.079345306	0
wormd20150528s93VX0034NIC20rt23w16r14	15	NIC20.1528	NIC20	Taiwan	23	5/28/15	14	11	293	567.593333	0.08462818	0.078766504	0.08605789	0.079345306	0
wormd20150528s93VX0034NIC20rt23w17r00	16	NIC20.1529	NIC20	Taiwan	23	5/28/15	0	25	229	460.088983	0.59685739	0.066072367	0.68019482	0.087402044	1
wormd20150528s93VX0034NIC20rt23w17r01	16	NIC20.1529	NIC20	Taiwan	23	5/28/15	1	24	183	425.984211	0.53158957	0.066072367	0.63473675	0.087402044	1
wormd20150528s93VX0034NIC20rt23w17r02	16	NIC20.1529	NIC20	Taiwan	23	5/28/15	2	23	254	437.570881	0.52659151	0.066072367	0.64615761	0.087402044	1
wormd20150528s93VX0034NIC20rt23w17r03	16	NIC20.1529	NIC20	Taiwan	23	5/28/15	3	22	202	440.68599	0.55413043	0.066072367	0.581797	0.087402044	1
wormd20150528s93VX0034NIC20rt23w17r04	16	NIC20.1529	NIC20	Taiwan	23	5/28/15	4	21	229	388.351931	0.4839628	0.066072367	0.49263704	0.087402044	1
wormd20150528s93VX0034NIC20rt23w17r05	16	NIC20.1529	NIC20	Taiwan	23	5/28/15	5	20	209	422.150943	0.39834596	0.066072367	0.52634921	0.087402044	1
wormd20150528s93VX0034NIC20rt23w17r06	16	NIC20.1529	NIC20	Taiwan	23	5/28/15	6	19	227	387.337607	0.38792109	0.066072367	0.66630547	0.087402044	1
wormd20150528s93VX0034NIC20rt23w17r07	16	NIC20.1529	NIC20	Taiwan	23	5/28/15	7	18	131	373.350365	0.33332455	0.066072367	0.67860522	0.087402044	1
wormd20150528s93VX0034NIC20rt23w17r08	16	NIC20.1529	NIC20	Taiwan	23	5/28/15	8	17	278	449.603509	0.16195163	0.066072367	0.46590125	0.087402044	1
wormd20150528s93VX0034NIC20rt23w17r09	16	NIC20.1529	NIC20	Taiwan	23	5/28/15	9	16	226	462.270386	0.10122572	0.066072367	0.23963329	0.087402044	1
wormd20150528s93VX0034NIC20rt23w17r10	16	NIC20.1529	NIC20	Taiwan	23	5/28/15	10	15	293	423.206667	0.06607237	0.066072367	0.09391907	0.087402044	0
wormd20150528s93VX0034NIC20rt23w17r11	16	NIC20.1529	NIC20	Taiwan	23	5/28/15	11	14	281	387.84375	0.09693035	0.066072367	0.12540017	0.087402044	0
wormd20150528s93VX0034NIC20rt23w17r12	16	NIC20.1529	NIC20	Taiwan	23	5/28/15	12	13	278	475.266904	0.08978965	0.066072367	0.11156765	0.087402044	0
wormd20150528s93VX0034NIC20rt23w17r13	16	NIC20.1529	NIC20	Taiwan	23	5/28/15	13	12	293	451.43	0.08546933	0.066072367	0.08740204	0.087402044	0
wormd20150528s93VX0034NIC20rt23w17r14	16	NIC20.1529	NIC20	Taiwan	23	5/28/15	14	11	293	495.466667	0.10778032	0.066072367	0.10647694	0.087402044	0
wormd20150528s93VX0034NIC20rt23w18r00	17	NIC20.1530	NIC20	Taiwan	23	5/28/15	0	25	201	713.865169	0.44911013	0.062742178	0.5190793	0.067098586	1
wormd20150528s93VX0034NIC20rt23w18r02	17	NIC20.1530	NIC20	Taiwan	23	5/28/15	2	23	163	704.902954	0.32491452	0.062742178	0.55660511	0.067098586	1
wormd20150528s93VX0034NIC20rt23w18r03	17	NIC20.1530	NIC20	Taiwan	23	5/28/15	3	22	147	617.886256	0.35927161	0.062742178	0.43364659	0.067098586	1
wormd20150528s93VX0034NIC20rt23w18r05	17	NIC20.1530	NIC20	Taiwan	23	5/28/15	5	20	189	714.845238	0.27928478	0.062742178	0.55454833	0.067098586	1
wormd20150528s93VX0034NIC20rt23w18r06	17	NIC20.1530	NIC20	Taiwan	23	5/28/15	6	19	173	669.597156	0.32670949	0.062742178	0.56901454	0.067098586	1
wormd20150528s93VX0034NIC20rt23w18r07	17	NIC20.1530	NIC20	Taiwan	23	5/28/15	7	18	136	618.906077	0.26552182	0.062742178	0.56816362	0.067098586	1
wormd20150528s93VX0034NIC20rt23w18r09	17	NIC20.1530	NIC20	Taiwan	23	5/28/15	9	16	282	738.40404	0.08034671	0.062742178	0.146631	0.067098586	1
wormd20150528s93VX0034NIC20rt23w18r10	17	NIC20.1530	NIC20	Taiwan	23	5/28/15	10	15	293	671.886667	0.06723923	0.062742178	0.09800701	0.067098586	0
wormd20150528s93VX0034NIC20rt23w18r11	17	NIC20.1530	NIC20	Taiwan	23	5/28/15	11	14	293	714.523333	0.06448751	0.062742178	0.07717973	0.067098586	0
wormd20150528s93VX0034NIC20rt23w18r12	17	NIC20.1530	NIC20	Taiwan	23	5/28/15	12	13	293	625.143333	0.06274218	0.062742178	0.06709859	0.067098586	0
wormd20150528s93VX0034NIC20rt23w18r13	17	NIC20.1530	NIC20	Taiwan	23	5/28/15	13	12	293	678.446667	0.0676945	0.062742178	0.06829579	0.067098586	0
wormd20150601s124NIC20NIC20rt23w04r00	3	NIC20.1531	NIC20	Taiwan	23	6/01/15	0	25	293	623.093333	0.45118931	0.044069465	0.54821282	0.044507943	1
wormd20150601s124NIC20NIC20rt23w04r01	3	NIC20.1531	NIC20	Taiwan	23	6/01/15	1	24	253	620.255814	0.43481189	0.044069465	0.53131153	0.044507943	1
wormd20150601s124NIC20NIC20rt23w04r02	3	NIC20.1531	NIC20	Taiwan	23	6/01/15	2	23	290	603.26936	0.46064014	0.044069465	0.53662366	0.044507943	1
wormd20150601s124NIC20NIC20rt23w04r03	3	NIC20.1531	NIC20	Taiwan	23	6/01/15	3	22	265	587.816176	0.4749519	0.044069465	0.42894832	0.044507943	1
wormd20150601s124NIC20NIC20rt23w04r04	3	NIC20.1531	NIC20	Taiwan	23	6/01/15	4	21	293	604.23	0.34637968	0.044069465	0.63093683	0.044507943	1
wormd20150601s124NIC20NIC20rt23w04r05	3	NIC20.1531	NIC20	Taiwan	23	6/01/15	5	20	289	589.418919	0.38781531	0.044069465	0.68456536	0.044507943	1
wormd20150601s124NIC20NIC20rt23w04r06	3	NIC20.1531	NIC20	Taiwan	23	6/01/15	6	19	237	604.704918	0.3744845	0.044069465	0.6510603	0.044507943	1
wormd20150601s124NIC20NIC20rt23w04r07	3	NIC20.1531	NIC20	Taiwan	23	6/01/15	7	18	204	614.961722	0.32375435	0.044069465	0.70177369	0.044507943	1
wormd20150601s124NIC20NIC20rt23w04r08	3	NIC20.1531	NIC20	Taiwan	23	6/01/15	8	17	293	635.476667	0.07848521	0.044069465	0.1445032	0.044507943	1
wormd20150601s124NIC20NIC20rt23w04r09	3	NIC20.1531	NIC20	Taiwan	23	6/01/15	9	16	293	527.706667	0.05496105	0.044069465	0.05839109	0.044507943	0
wormd20150601s124NIC20NIC20rt23w04r10	3	NIC20.1531	NIC20	Taiwan	23	6/01/15	10	15	284	482.553265	0.04830433	0.044069465	0.04875027	0.044507943	0
wormd20150601s124NIC20NIC20rt23w04r11	3	NIC20.1531	NIC20	Taiwan	23	6/01/15	11	14	293	554.486667	0.05211742	0.044069465	0.05343443	0.044507943	0
wormd20150601s124NIC20NIC20rt23w04r12	3	NIC20.1531	NIC20	Taiwan	23	6/01/15	12	13	293	439.24	0.04794522	0.044069465	0.04882162	0.044507943	0
wormd20150601s124NIC20NIC20rt23w04r13	3	NIC20.1531	NIC20	Taiwan	23	6/01/15	13	12	293	431.823333	0.04805272	0.044069465	0.04726918	0.044507943	0
wormd20150601s124NIC20NIC20rt23w04r14	3	NIC20.1531	NIC20	Taiwan	23	6/01/15	14	11	293	438.326667	0.04406947	0.044069465	0.04450794	0.044507943	0
wormd20150601s124NIC20NIC20rt23w04r15	3	NIC20.1531	NIC20	Taiwan	23	6/01/15	15	10	293	554.816667	0.07171208	0.044069465	0.07260653	0.044507943	0
wormd20150601s124NIC20NIC20rt23w04r16	3	NIC20.1531	NIC20	Taiwan	23	6/01/15	16	9	293	695.173333	0.07281343	0.044069465	0.07318346	0.044507943	0
wormd20150601s124NIC20NIC20rt23w06r00	5	NIC20.1533	NIC20	Taiwan	23	6/01/15	0	25	293	588.546667	0.33931001	0.058650769	0.56262123	0.06407183	1
wormd20150601s124NIC20NIC20rt23w06r01	5	NIC20.1533	NIC20	Taiwan	23	6/01/15	1	24	208	567.757447	0.40154369	0.058650769	0.53263432	0.06407183	1
wormd20150601s124NIC20NIC20rt23w06r02	5	NIC20.1533	NIC20	Taiwan	23	6/01/15	2	23	287	542.846939	0.39665151	0.058650769	0.55151445	0.06407183	1
wormd20150601s124NIC20NIC20rt23w06r03	5	NIC20.1533	NIC20	Taiwan	23	6/01/15	3	22	268	576.618182	0.35276185	0.058650769	0.46195136	0.06407183	1
wormd20150601s124NIC20NIC20rt23w06r04	5	NIC20.1533	NIC20	Taiwan	23	6/01/15	4	21	290	548.69697	0.36261157	0.058650769	0.47154289	0.06407183	1
wormd20150601s124NIC20NIC20rt23w06r05	5	NIC20.1533	NIC20	Taiwan	23	6/01/15	5	20	190	498.258883	0.33209863	0.058650769	0.45004974	0.06407183	1
wormd20150601s124NIC20NIC20rt23w06r06	5	NIC20.1533	NIC20	Taiwan	23	6/01/15	6	19	281	546.28125	0.28088223	0.058650769	0.56444742	0.06407183	1
wormd20150601s124NIC20NIC20rt23w06r07	5	NIC20.1533	NIC20	Taiwan	23	6/01/15	7	18	197	571.416667	0.24284356	0.058650769	0.50618643	0.06407183	1
wormd20150601s124NIC20NIC20rt23w06r08	5	NIC20.1533	NIC20	Taiwan	23	6/01/15	8	17	293	510.363333	0.10966367	0.058650769	0.27849992	0.06407183	1
wormd20150601s124NIC20NIC20rt23w06r09	5	NIC20.1533	NIC20	Taiwan	23	6/01/15	9	16	293	538.493333	0.08067397	0.058650769	0.1778497	0.06407183	1
wormd20150601s124NIC20NIC20rt23w06r10	5	NIC20.1533	NIC20	Taiwan	23	6/01/15	10	15	293	519.636667	0.05865077	0.058650769	0.08048485	0.06407183	0
wormd20150601s124NIC20NIC20rt23w06r11	5	NIC20.1533	NIC20	Taiwan	23	6/01/15	11	14	293	515.636667	0.07463027	0.058650769	0.12281815	0.06407183	0
wormd20150601s124NIC20NIC20rt23w06r12	5	NIC20.1533	NIC20	Taiwan	23	6/01/15	12	13	293	498.723333	0.08116477	0.058650769	0.0977154	0.06407183	0
wormd20150601s124NIC20NIC20rt23w06r13	5	NIC20.1533	NIC20	Taiwan	23	6/01/15	13	12	293	547.416667	0.06315205	0.058650769	0.06407183	0.06407183	0
wormd20150601s124NIC20NIC20rt23w06r14	5	NIC20.1533	NIC20	Taiwan	23	6/01/15	14	11	293	468.48	0.08175507	0.058650769	0.08189072	0.06407183	0
wormd20150601s124NIC20NIC20rt23w06r15	5	NIC20.1533	NIC20	Taiwan	23	6/01/15	15	10	293	461.33	0.08085832	0.058650769	0.08095989	0.06407183	0
wormd20150601s124NIC20NIC20rt23w06r16	5	NIC20.1533	NIC20	Taiwan	23	6/01/15	16	9	293	460.846667	0.08372849	0.058650769	0.08486276	0.06407183	0
wormd20150601s124NIC20NIC20rt23w06r17	5	NIC20.1533	NIC20	Taiwan	23	6/01/15	17	8	293	492.273333	0.08403313	0.058650769	0.08411729	0.06407183	0
wormd20150601s124NIC20NIC20rt23w10r00	9	NIC20.1534	NIC20	Taiwan	23	6/01/15	0	25	292	623.448161	0.44376365	0.040714463	0.50545249	0.045357882	1
wormd20150601s124NIC20NIC20rt23w10r01	9	NIC20.1534	NIC20	Taiwan	23	6/01/15	1	24	293	639.086667	0.40974104	0.040714463	0.48339585	0.045357882	1
wormd20150601s124NIC20NIC20rt23w10r02	9	NIC20.1534	NIC20	Taiwan	23	6/01/15	2	23	293	648.343333	0.39916471	0.040714463	0.52009884	0.045357882	1
wormd20150601s124NIC20NIC20rt23w10r03	9	NIC20.1534	NIC20	Taiwan	23	6/01/15	3	22	240	636.562753	0.36956516	0.040714463	0.50314807	0.045357882	1
wormd20150601s124NIC20NIC20rt23w10r04	9	NIC20.1534	NIC20	Taiwan	23	6/01/15	4	21	293	680.02	0.29993368	0.040714463	0.55612855	0.045357882	1
wormd20150601s124NIC20NIC20rt23w10r05	9	NIC20.1534	NIC20	Taiwan	23	6/01/15	5	20	237	676.580645	0.25137691	0.040714463	0.6070198	0.045357882	1
wormd20150601s124NIC20NIC20rt23w10r06	9	NIC20.1534	NIC20	Taiwan	23	6/01/15	6	19	282	656.446367	0.2945559	0.040714463	0.66813228	0.045357882	1
wormd20150601s124NIC20NIC20rt23w10r07	9	NIC20.1534	NIC20	Taiwan	23	6/01/15	7	18	293	686.73	0.28316977	0.040714463	0.66938059	0.045357882	1
wormd20150601s124NIC20NIC20rt23w10r08	9	NIC20.1534	NIC20	Taiwan	23	6/01/15	8	17	293	635.95	0.08262692	0.040714463	0.17246244	0.045357882	1
wormd20150601s124NIC20NIC20rt23w10r09	9	NIC20.1534	NIC20	Taiwan	23	6/01/15	9	16	293	693.31	0.08266455	0.040714463	0.11965739	0.045357882	0
wormd20150601s124NIC20NIC20rt23w10r10	9	NIC20.1534	NIC20	Taiwan	23	6/01/15	10	15	293	509.876667	0.06537072	0.040714463	0.06584714	0.045357882	0
wormd20150601s124NIC20NIC20rt23w10r11	9	NIC20.1534	NIC20	Taiwan	23	6/01/15	11	14	293	534.136667	0.06174719	0.040714463	0.06252528	0.045357882	0
wormd20150601s124NIC20NIC20rt23w10r12	9	NIC20.1534	NIC20	Taiwan	23	6/01/15	12	13	293	581.803333	0.06664862	0.040714463	0.0851375	0.045357882	0
wormd20150601s124NIC20NIC20rt23w10r13	9	NIC20.1534	NIC20	Taiwan	23	6/01/15	13	12	187	430.457547	0.04071446	0.040714463	0.04535788	0.045357882	0
wormd20150601s124NIC20NIC20rt23w10r14	9	NIC20.1534	NIC20	Taiwan	23	6/01/15	14	11	290	511.040404	0.05690628	0.040714463	0.05820917	0.045357882	0
wormd20150601s124NIC20NIC20rt23w10r15	9	NIC20.1534	NIC20	Taiwan	23	6/01/15	15	10	293	609.536667	0.06243853	0.040714463	0.06267607	0.045357882	0
wormd20150601s124NIC20NIC20rt23w10r16	9	NIC20.1534	NIC20	Taiwan	23	6/01/15	16	9	213	746.458333	0.08656116	0.040714463	0.08704072	0.045357882	0
wormd20150601s124NIC20NIC20rt23w11r00	10	NIC20.1535	NIC20	Taiwan	23	6/01/15	0	25	255	591.007634	0.45699233	0.052489635	0.58850944	0.055011437	1
wormd20150601s124NIC20NIC20rt23w11r01	10	NIC20.1535	NIC20	Taiwan	23	6/01/15	1	24	293	665.21	0.38366968	0.052489635	0.56937539	0.055011437	1
wormd20150601s124NIC20NIC20rt23w11r02	10	NIC20.1535	NIC20	Taiwan	23	6/01/15	2	23	238	619.53668	0.42473851	0.052489635	0.53470393	0.055011437	1
wormd20150601s124NIC20NIC20rt23w11r03	10	NIC20.1535	NIC20	Taiwan	23	6/01/15	3	22	285	627.368601	0.41073179	0.052489635	0.57364839	0.055011437	1
wormd20150601s124NIC20NIC20rt23w11r04	10	NIC20.1535	NIC20	Taiwan	23	6/01/15	4	21	249	619.900398	0.36039164	0.052489635	0.57804996	0.055011437	1
wormd20150601s124NIC20NIC20rt23w11r05	10	NIC20.1535	NIC20	Taiwan	23	6/01/15	5	20	292	608.712375	0.38417084	0.052489635	0.62538556	0.055011437	1
wormd20150601s124NIC20NIC20rt23w11r06	10	NIC20.1535	NIC20	Taiwan	23	6/01/15	6	19	187	641.515464	0.35847958	0.052489635	0.63654209	0.055011437	1
wormd20150601s124NIC20NIC20rt23w11r07	10	NIC20.1535	NIC20	Taiwan	23	6/01/15	7	18	289	612.993197	0.26530477	0.052489635	0.68147286	0.055011437	1
wormd20150601s124NIC20NIC20rt23w11r08	10	NIC20.1535	NIC20	Taiwan	23	6/01/15	8	17	293	633.97	0.1815045	0.052489635	0.58255145	0.055011437	1
wormd20150601s124NIC20NIC20rt23w11r09	10	NIC20.1535	NIC20	Taiwan	23	6/01/15	9	16	293	642.803333	0.09642104	0.052489635	0.279527	0.055011437	1
wormd20150601s124NIC20NIC20rt23w11r10	10	NIC20.1535	NIC20	Taiwan	23	6/01/15	10	15	293	660.59	0.08147253	0.052489635	0.14263208	0.055011437	1
wormd20150601s124NIC20NIC20rt23w11r11	10	NIC20.1535	NIC20	Taiwan	23	6/01/15	11	14	293	670.923333	0.06214538	0.052489635	0.10011086	0.055011437	0
wormd20150601s124NIC20NIC20rt23w11r12	10	NIC20.1535	NIC20	Taiwan	23	6/01/15	12	13	293	557.086667	0.05248964	0.052489635	0.05786451	0.055011437	0
wormd20150601s124NIC20NIC20rt23w11r13	10	NIC20.1535	NIC20	Taiwan	23	6/01/15	13	12	293	607.973333	0.06768834	0.052489635	0.09383386	0.055011437	0
wormd20150601s124NIC20NIC20rt23w11r14	10	NIC20.1535	NIC20	Taiwan	23	6/01/15	14	11	293	640.31	0.05504294	0.052489635	0.05501144	0.055011437	0
wormd20150601s124NIC20NIC20rt23w11r15	10	NIC20.1535	NIC20	Taiwan	23	6/01/15	15	10	293	636.923333	0.05477806	0.052489635	0.05574802	0.055011437	0
wormd20150601s124NIC20NIC20rt23w11r16	10	NIC20.1535	NIC20	Taiwan	23	6/01/15	16	9	293	591.786667	0.06436991	0.052489635	0.06416013	0.055011437	0
wormd20150601s124NIC20NIC20rt23w11r17	10	NIC20.1535	NIC20	Taiwan	23	6/01/15	17	8	293	599.113333	0.06562173	0.052489635	0.06557904	0.055011437	0
wormd20150601s124NIC20NIC20rt23w12r00	11	NIC20.1536	NIC20	Taiwan	23	6/01/15	0	25	201	666.520325	0.36690715	0.088799726	0.55477674	0.088736276	1
wormd20150601s124NIC20NIC20rt23w12r03	11	NIC20.1536	NIC20	Taiwan	23	6/01/15	3	22	105	214.390909	0.17301682	0.088799726	0.17490981	0.088736276	1
wormd20150601s124NIC20NIC20rt23w12r04	11	NIC20.1536	NIC20	Taiwan	23	6/01/15	4	21	188	250.484536	0.16088904	0.088799726	0.16443073	0.088736276	1
wormd20150601s124NIC20NIC20rt23w12r05	11	NIC20.1536	NIC20	Taiwan	23	6/01/15	5	20	289	267.483108	0.15995689	0.088799726	0.16143981	0.088736276	1
wormd20150601s124NIC20NIC20rt23w12r06	11	NIC20.1536	NIC20	Taiwan	23	6/01/15	6	19	293	290.69	0.14414203	0.088799726	0.14376108	0.088736276	1
wormd20150601s124NIC20NIC20rt23w12r07	11	NIC20.1536	NIC20	Taiwan	23	6/01/15	7	18	270	330.032491	0.13667055	0.088799726	0.15315036	0.088736276	1
wormd20150601s124NIC20NIC20rt23w12r08	11	NIC20.1536	NIC20	Taiwan	23	6/01/15	8	17	293	348.513333	0.12281515	0.088799726	0.12136661	0.088736276	0
wormd20150601s124NIC20NIC20rt23w12r09	11	NIC20.1536	NIC20	Taiwan	23	6/01/15	9	16	293	376.256667	0.12082103	0.088799726	0.1225129	0.088736276	0
wormd20150601s124NIC20NIC20rt23w12r10	11	NIC20.1536	NIC20	Taiwan	23	6/01/15	10	15	293	405.713333	0.12110426	0.088799726	0.1252619	0.088736276	0
wormd20150601s124NIC20NIC20rt23w12r11	11	NIC20.1536	NIC20	Taiwan	23	6/01/15	11	14	293	447.353333	0.12430681	0.088799726	0.12683199	0.088736276	0
wormd20150601s124NIC20NIC20rt23w12r12	11	NIC20.1536	NIC20	Taiwan	23	6/01/15	12	13	293	494.93	0.1242079	0.088799726	0.12551136	0.088736276	0
wormd20150601s124NIC20NIC20rt23w12r13	11	NIC20.1536	NIC20	Taiwan	23	6/01/15	13	12	293	544.643333	0.11190509	0.088799726	0.11363535	0.088736276	0
wormd20150601s124NIC20NIC20rt23w12r14	11	NIC20.1536	NIC20	Taiwan	23	6/01/15	14	11	293	576.263333	0.10337148	0.088799726	0.10271039	0.088736276	0
wormd20150601s124NIC20NIC20rt23w12r15	11	NIC20.1536	NIC20	Taiwan	23	6/01/15	15	10	293	601.63	0.09615099	0.088799726	0.09639481	0.088736276	0
wormd20150601s124NIC20NIC20rt23w12r16	11	NIC20.1536	NIC20	Taiwan	23	6/01/15	16	9	293	631.613333	0.08879973	0.088799726	0.08873628	0.088736276	0
wormd20150601s124NIC20NIC20rt23w12r17	11	NIC20.1536	NIC20	Taiwan	23	6/01/15	17	8	203	762.234657	0.11957029	0.088799726	0.11790479	0.088736276	0
wormd20150601s124NIC20NIC20rt23w16r00	15	NIC20.1537	NIC20	Taiwan	23	6/01/15	0	25	289	503.72973	0.46915662	0.05283105	0.62947109	0.052875892	1
wormd20150601s124NIC20NIC20rt23w16r01	15	NIC20.1537	NIC20	Taiwan	23	6/01/15	1	24	292	503.966555	0.48173529	0.05283105	0.61849233	0.052875892	1
wormd20150601s124NIC20NIC20rt23w16r02	15	NIC20.1537	NIC20	Taiwan	23	6/01/15	2	23	293	514.263333	0.44336703	0.05283105	0.58125893	0.052875892	1
wormd20150601s124NIC20NIC20rt23w16r03	15	NIC20.1537	NIC20	Taiwan	23	6/01/15	3	22	290	509.494949	0.38346505	0.05283105	0.67182245	0.052875892	1
wormd20150601s124NIC20NIC20rt23w16r04	15	NIC20.1537	NIC20	Taiwan	23	6/01/15	4	21	293	531.06	0.32622423	0.05283105	0.61784266	0.052875892	1
wormd20150601s124NIC20NIC20rt23w16r05	15	NIC20.1537	NIC20	Taiwan	23	6/01/15	5	20	293	527.386667	0.35411538	0.05283105	0.53581914	0.052875892	1
wormd20150601s124NIC20NIC20rt23w16r06	15	NIC20.1537	NIC20	Taiwan	23	6/01/15	6	19	293	514.626667	0.27040475	0.05283105	0.70541462	0.052875892	1
wormd20150601s124NIC20NIC20rt23w16r07	15	NIC20.1537	NIC20	Taiwan	23	6/01/15	7	18	273	525.960714	0.30339141	0.05283105	0.6862295	0.052875892	1
wormd20150601s124NIC20NIC20rt23w16r08	15	NIC20.1537	NIC20	Taiwan	23	6/01/15	8	17	293	524.073333	0.18474723	0.05283105	0.59330081	0.052875892	1
wormd20150601s124NIC20NIC20rt23w16r09	15	NIC20.1537	NIC20	Taiwan	23	6/01/15	9	16	293	513.143333	0.12081124	0.05283105	0.38799154	0.052875892	1
wormd20150601s124NIC20NIC20rt23w16r10	15	NIC20.1537	NIC20	Taiwan	23	6/01/15	10	15	293	481.663333	0.07014009	0.05283105	0.11128099	0.052875892	0
wormd20150601s124NIC20NIC20rt23w16r11	15	NIC20.1537	NIC20	Taiwan	23	6/01/15	11	14	293	463.916667	0.07093344	0.05283105	0.10654019	0.052875892	0
wormd20150601s124NIC20NIC20rt23w16r12	15	NIC20.1537	NIC20	Taiwan	23	6/01/15	12	13	290	430.828283	0.05659161	0.05283105	0.06401563	0.052875892	0
wormd20150601s124NIC20NIC20rt23w16r13	15	NIC20.1537	NIC20	Taiwan	23	6/01/15	13	12	293	475.01	0.06597986	0.05283105	0.06802172	0.052875892	0
wormd20150601s124NIC20NIC20rt23w16r14	15	NIC20.1537	NIC20	Taiwan	23	6/01/15	14	11	293	482.716667	0.05283105	0.05283105	0.05287589	0.052875892	0
wormd20150601s124NIC20NIC20rt23w16r15	15	NIC20.1537	NIC20	Taiwan	23	6/01/15	15	10	293	482.686667	0.05296233	0.05283105	0.0533314	0.052875892	0
wormd20150601s124NIC20NIC20rt23w16r16	15	NIC20.1537	NIC20	Taiwan	23	6/01/15	16	9	293	498.913333	0.07733167	0.05283105	0.07869696	0.052875892	0
wormd20150601s124NIC20NIC20rt23w16r17	15	NIC20.1537	NIC20	Taiwan	23	6/01/15	17	8	293	515.09	0.07583477	0.05283105	0.07695314	0.052875892	0
wormd20150601s124NIC20NIC20rt23w17r00	16	NIC20.1538	NIC20	Taiwan	23	6/01/15	0	25	276	582.664311	0.47222427	0.052284496	0.58448175	0.054772187	1
wormd20150601s124NIC20NIC20rt23w17r01	16	NIC20.1538	NIC20	Taiwan	23	6/01/15	1	24	277	582.084507	0.47599957	0.052284496	0.59496988	0.054772187	1
wormd20150601s124NIC20NIC20rt23w17r02	16	NIC20.1538	NIC20	Taiwan	23	6/01/15	2	23	293	597.153333	0.41571239	0.052284496	0.56673892	0.054772187	1
wormd20150601s124NIC20NIC20rt23w17r03	16	NIC20.1538	NIC20	Taiwan	23	6/01/15	3	22	237	595.193916	0.38219525	0.052284496	0.59215484	0.054772187	1
wormd20150601s124NIC20NIC20rt23w17r04	16	NIC20.1538	NIC20	Taiwan	23	6/01/15	4	21	179	566.347826	0.41309639	0.052284496	0.62733115	0.054772187	1
wormd20150601s124NIC20NIC20rt23w17r07	16	NIC20.1538	NIC20	Taiwan	23	6/01/15	7	18	219	143.129464	0.1938226	0.052284496	0.19852893	0.054772187	1
wormd20150601s124NIC20NIC20rt23w17r08	16	NIC20.1538	NIC20	Taiwan	23	6/01/15	8	17	244	165.14	0.19397308	0.052284496	0.19539902	0.054772187	1
wormd20150601s124NIC20NIC20rt23w17r09	16	NIC20.1538	NIC20	Taiwan	23	6/01/15	9	16	222	193.339207	0.14908108	0.052284496	0.14685718	0.054772187	1
wormd20150601s124NIC20NIC20rt23w17r10	16	NIC20.1538	NIC20	Taiwan	23	6/01/15	10	15	124	247.410853	0.12769088	0.052284496	0.13426945	0.054772187	0
wormd20150601s124NIC20NIC20rt23w17r12	16	NIC20.1538	NIC20	Taiwan	23	6/01/15	12	13	161	446.475904	0.0522845	0.052284496	0.05812708	0.054772187	0
wormd20150601s124NIC20NIC20rt23w17r13	16	NIC20.1538	NIC20	Taiwan	23	6/01/15	13	12	284	511.687285	0.08566072	0.052284496	0.10134474	0.054772187	0
wormd20150601s124NIC20NIC20rt23w17r14	16	NIC20.1538	NIC20	Taiwan	23	6/01/15	14	11	287	462.465986	0.05568568	0.052284496	0.05544554	0.054772187	0
wormd20150601s124NIC20NIC20rt23w17r15	16	NIC20.1538	NIC20	Taiwan	23	6/01/15	15	10	272	473.978495	0.05465217	0.052284496	0.05477219	0.054772187	0
wormd20150601s124NIC20NIC20rt23w17r16	16	NIC20.1538	NIC20	Taiwan	23	6/01/15	16	9	270	496.620939	0.05537519	0.052284496	0.0552246	0.054772187	0
wormd20150601s124NIC20NIC20rt23w17r17	16	NIC20.1538	NIC20	Taiwan	23	6/01/15	17	8	269	600.547101	0.07164417	0.052284496	0.07491758	0.054772187	0
wormd20150601s124NIC20NIC20rt23w18r00	17	NIC20.1539	NIC20	Taiwan	23	6/01/15	0	25	258	576.345725	0.4852888	0.051524359	0.57516517	0.058699694	1
wormd20150601s124NIC20NIC20rt23w18r01	17	NIC20.1539	NIC20	Taiwan	23	6/01/15	1	24	290	594.56229	0.40810541	0.051524359	0.56261649	0.058699694	1
wormd20150601s124NIC20NIC20rt23w18r02	17	NIC20.1539	NIC20	Taiwan	23	6/01/15	2	23	293	626	0.46872573	0.051524359	0.51191327	0.058699694	1
wormd20150601s124NIC20NIC20rt23w18r03	17	NIC20.1539	NIC20	Taiwan	23	6/01/15	3	22	269	581.278986	0.40000943	0.051524359	0.64091828	0.058699694	1
wormd20150601s124NIC20NIC20rt23w18r04	17	NIC20.1539	NIC20	Taiwan	23	6/01/15	4	21	172	538.072626	0.37814335	0.051524359	0.5526467	0.058699694	1
wormd20150601s124NIC20NIC20rt23w18r05	17	NIC20.1539	NIC20	Taiwan	23	6/01/15	5	20	267	638.459364	0.31631867	0.051524359	0.66502067	0.058699694	1
wormd20150601s124NIC20NIC20rt23w18r06	17	NIC20.1539	NIC20	Taiwan	23	6/01/15	6	19	239	550.585366	0.3621307	0.051524359	0.63867292	0.058699694	1
wormd20150601s124NIC20NIC20rt23w18r07	17	NIC20.1539	NIC20	Taiwan	23	6/01/15	7	18	274	632.232323	0.29381437	0.051524359	0.63476493	0.058699694	1
wormd20150601s124NIC20NIC20rt23w18r08	17	NIC20.1539	NIC20	Taiwan	23	6/01/15	8	17	267	552.208029	0.25306778	0.051524359	0.6859559	0.058699694	1
wormd20150601s124NIC20NIC20rt23w18r09	17	NIC20.1539	NIC20	Taiwan	23	6/01/15	9	16	281	553.642361	0.17807622	0.051524359	0.61916038	0.058699694	1
wormd20150601s124NIC20NIC20rt23w18r10	17	NIC20.1539	NIC20	Taiwan	23	6/01/15	10	15	293	500.57	0.08965674	0.051524359	0.18295889	0.058699694	1
wormd20150601s124NIC20NIC20rt23w18r11	17	NIC20.1539	NIC20	Taiwan	23	6/01/15	11	14	293	539.353333	0.0747152	0.051524359	0.12412732	0.058699694	0
wormd20150601s124NIC20NIC20rt23w18r12	17	NIC20.1539	NIC20	Taiwan	23	6/01/15	12	13	293	518.403333	0.05152436	0.051524359	0.06125478	0.058699694	0
wormd20150601s124NIC20NIC20rt23w18r13	17	NIC20.1539	NIC20	Taiwan	23	6/01/15	13	12	293	548.69	0.05779596	0.051524359	0.05869969	0.058699694	0
wormd20150601s124NIC20NIC20rt23w18r14	17	NIC20.1539	NIC20	Taiwan	23	6/01/15	14	11	293	574.776667	0.07401212	0.051524359	0.07514218	0.058699694	0
wormd20150601s124NIC20NIC20rt23w18r15	17	NIC20.1539	NIC20	Taiwan	23	6/01/15	15	10	293	568.646667	0.07306219	0.051524359	0.07274578	0.058699694	0
wormd20150601s124NIC20NIC20rt23w18r16	17	NIC20.1539	NIC20	Taiwan	23	6/01/15	16	9	293	626.036667	0.10013412	0.051524359	0.10287059	0.058699694	0
wormd20150601s124NIC20NIC20rt23w18r17	17	NIC20.1539	NIC20	Taiwan	23	6/01/15	17	8	293	709.056667	0.09874948	0.051524359	0.09838422	0.058699694	0
wormd20150603s115JU1345NIC20rt23w04r00	3	NIC20.1584	NIC20	Taiwan	23	6/03/15	0	25	293	442.576667	0.46243335	0.062751748	0.52314727	0.063055714	1
wormd20150603s115JU1345NIC20rt23w04r01	3	NIC20.1584	NIC20	Taiwan	23	6/03/15	1	24	226	455.613734	0.49123257	0.062751748	0.58362065	0.063055714	1
wormd20150603s115JU1345NIC20rt23w04r02	3	NIC20.1584	NIC20	Taiwan	23	6/03/15	2	23	249	478.667969	0.43870706	0.062751748	0.59136724	0.063055714	1
wormd20150603s115JU1345NIC20rt23w04r03	3	NIC20.1584	NIC20	Taiwan	23	6/03/15	3	22	212	462.780822	0.36808366	0.062751748	0.61364818	0.063055714	1
wormd20150603s115JU1345NIC20rt23w04r04	3	NIC20.1584	NIC20	Taiwan	23	6/03/15	4	21	135	141.014184	0.24143223	0.062751748	0.25433029	0.063055714	1
wormd20150603s115JU1345NIC20rt23w04r05	3	NIC20.1584	NIC20	Taiwan	23	6/03/15	5	20	264	207.162963	0.18787113	0.062751748	0.20129708	0.063055714	1
wormd20150603s115JU1345NIC20rt23w04r06	3	NIC20.1584	NIC20	Taiwan	23	6/03/15	6	19	290	272.501684	0.17556761	0.062751748	0.17196053	0.063055714	1
wormd20150603s115JU1345NIC20rt23w04r07	3	NIC20.1584	NIC20	Taiwan	23	6/03/15	7	18	293	353.466667	0.14066866	0.062751748	0.14276327	0.063055714	1
wormd20150603s115JU1345NIC20rt23w04r08	3	NIC20.1584	NIC20	Taiwan	23	6/03/15	8	17	293	409.953333	0.10659407	0.062751748	0.10948825	0.063055714	0
wormd20150603s115JU1345NIC20rt23w04r09	3	NIC20.1584	NIC20	Taiwan	23	6/03/15	9	16	293	435.27	0.09496702	0.062751748	0.09468318	0.063055714	0
wormd20150603s115JU1345NIC20rt23w04r10	3	NIC20.1584	NIC20	Taiwan	23	6/03/15	10	15	293	462.316667	0.08317998	0.062751748	0.08279672	0.063055714	0
wormd20150603s115JU1345NIC20rt23w04r11	3	NIC20.1584	NIC20	Taiwan	23	6/03/15	11	14	293	482.43	0.07742791	0.062751748	0.07756526	0.063055714	0
wormd20150603s115JU1345NIC20rt23w04r12	3	NIC20.1584	NIC20	Taiwan	23	6/03/15	12	13	293	492.233333	0.07031072	0.062751748	0.06909532	0.063055714	0
wormd20150603s115JU1345NIC20rt23w04r13	3	NIC20.1584	NIC20	Taiwan	23	6/03/15	13	12	293	503.923333	0.06587497	0.062751748	0.06657906	0.063055714	0
wormd20150603s115JU1345NIC20rt23w04r14	3	NIC20.1584	NIC20	Taiwan	23	6/03/15	14	11	293	513.93	0.06674203	0.062751748	0.0653207	0.063055714	0
wormd20150603s115JU1345NIC20rt23w04r15	3	NIC20.1584	NIC20	Taiwan	23	6/03/15	15	10	293	522.63	0.0671796	0.062751748	0.06752318	0.063055714	0
wormd20150603s115JU1345NIC20rt23w04r16	3	NIC20.1584	NIC20	Taiwan	23	6/03/15	16	9	293	530.503333	0.06275175	0.062751748	0.06317747	0.063055714	0
wormd20150603s115JU1345NIC20rt23w04r17	3	NIC20.1584	NIC20	Taiwan	23	6/03/15	17	8	293	534.813333	0.06346807	0.062751748	0.06305571	0.063055714	0
wormd20150603s115JU1345NIC20rt23w05r00	4	NIC20.1585	NIC20	Taiwan	23	6/03/15	0	25	226	653.883019	0.46005161	0.045184008	0.53950782	0.045656813	1
wormd20150603s115JU1345NIC20rt23w05r01	4	NIC20.1585	NIC20	Taiwan	23	6/03/15	1	24	163	318.078049	0.16020689	0.045184008	0.13587779	0.045656813	0
wormd20150603s115JU1345NIC20rt23w05r02	4	NIC20.1585	NIC20	Taiwan	23	6/03/15	2	23	247	635.909091	0.39763374	0.045184008	0.4873522	0.045656813	1
wormd20150603s115JU1345NIC20rt23w05r03	4	NIC20.1585	NIC20	Taiwan	23	6/03/15	3	22	198	499.858407	0.31534301	0.045184008	0.43712841	0.045656813	1
wormd20150603s115JU1345NIC20rt23w05r04	4	NIC20.1585	NIC20	Taiwan	23	6/03/15	4	21	244	640.713178	0.33395485	0.045184008	0.5143523	0.045656813	1
wormd20150603s115JU1345NIC20rt23w05r05	4	NIC20.1585	NIC20	Taiwan	23	6/03/15	5	20	228	644.971074	0.31938292	0.045184008	0.52438181	0.045656813	1
wormd20150603s115JU1345NIC20rt23w05r06	4	NIC20.1585	NIC20	Taiwan	23	6/03/15	6	19	222	647.767544	0.35509287	0.045184008	0.68573648	0.045656813	1
wormd20150603s115JU1345NIC20rt23w05r07	4	NIC20.1585	NIC20	Taiwan	23	6/03/15	7	18	183	631.847368	0.28255062	0.045184008	0.66176398	0.045656813	1
wormd20150603s115JU1345NIC20rt23w05r08	4	NIC20.1585	NIC20	Taiwan	23	6/03/15	8	17	252	600.338521	0.16500035	0.045184008	0.48715105	0.045656813	1
wormd20150603s115JU1345NIC20rt23w05r09	4	NIC20.1585	NIC20	Taiwan	23	6/03/15	9	16	293	610.476667	0.06148681	0.045184008	0.11008943	0.045656813	0
wormd20150603s115JU1345NIC20rt23w05r10	4	NIC20.1585	NIC20	Taiwan	23	6/03/15	10	15	293	628.156667	0.05712716	0.045184008	0.05846125	0.045656813	0
wormd20150603s115JU1345NIC20rt23w05r11	4	NIC20.1585	NIC20	Taiwan	23	6/03/15	11	14	293	589.926667	0.04518401	0.045184008	0.04565681	0.045656813	0
wormd20150603s115JU1345NIC20rt23w05r12	4	NIC20.1585	NIC20	Taiwan	23	6/03/15	12	13	293	546.19	0.05120993	0.045184008	0.0521344	0.045656813	0
wormd20150603s115JU1345NIC20rt23w05r13	4	NIC20.1585	NIC20	Taiwan	23	6/03/15	13	12	293	552.17	0.05183602	0.045184008	0.05308791	0.045656813	0
wormd20150603s115JU1345NIC20rt23w05r14	4	NIC20.1585	NIC20	Taiwan	23	6/03/15	14	11	293	575.693333	0.04978233	0.045184008	0.05005234	0.045656813	0
wormd20150603s115JU1345NIC20rt23w05r15	4	NIC20.1585	NIC20	Taiwan	23	6/03/15	15	10	293	634.97	0.06781359	0.045184008	0.07662645	0.045656813	0
wormd20150603s115JU1345NIC20rt23w05r16	4	NIC20.1585	NIC20	Taiwan	23	6/03/15	16	9	293	603.03	0.05403596	0.045184008	0.05446116	0.045656813	0
wormd20150603s115JU1345NIC20rt23w05r17	4	NIC20.1585	NIC20	Taiwan	23	6/03/15	17	8	293	632.486667	0.06687135	0.045184008	0.06748227	0.045656813	0
wormd20150603s115JU1345NIC20rt23w06r00	5	NIC20.1586	NIC20	Taiwan	23	6/03/15	0	25	220	536.755365	0.47515474	0.047723087	0.59228822	0.05023448	1
wormd20150603s115JU1345NIC20rt23w06r01	5	NIC20.1586	NIC20	Taiwan	23	6/03/15	1	24	264	566.672932	0.46643109	0.047723087	0.5467905	0.05023448	1
wormd20150603s115JU1345NIC20rt23w06r02	5	NIC20.1586	NIC20	Taiwan	23	6/03/15	2	23	235	558.6	0.47179295	0.047723087	0.54902842	0.05023448	1
wormd20150603s115JU1345NIC20rt23w06r03	5	NIC20.1586	NIC20	Taiwan	23	6/03/15	3	22	199	537.718447	0.46158614	0.047723087	0.54267178	0.05023448	1
wormd20150603s115JU1345NIC20rt23w06r04	5	NIC20.1586	NIC20	Taiwan	23	6/03/15	4	21	186	571.663212	0.29592681	0.047723087	0.52119727	0.05023448	1
wormd20150603s115JU1345NIC20rt23w06r05	5	NIC20.1586	NIC20	Taiwan	23	6/03/15	5	20	160	441.257485	0.26749586	0.047723087	0.33902203	0.05023448	1
wormd20150603s115JU1345NIC20rt23w06r06	5	NIC20.1586	NIC20	Taiwan	23	6/03/15	6	19	175	503.832402	0.32809058	0.047723087	0.54733397	0.05023448	1
wormd20150603s115JU1345NIC20rt23w06r07	5	NIC20.1586	NIC20	Taiwan	23	6/03/15	7	18	282	525.875433	0.35492976	0.047723087	0.66193833	0.05023448	1
wormd20150603s115JU1345NIC20rt23w06r08	5	NIC20.1586	NIC20	Taiwan	23	6/03/15	8	17	293	532.57	0.18857387	0.047723087	0.55013234	0.05023448	1
wormd20150603s115JU1345NIC20rt23w06r09	5	NIC20.1586	NIC20	Taiwan	23	6/03/15	9	16	293	544.1	0.12849588	0.047723087	0.44155249	0.05023448	1
wormd20150603s115JU1345NIC20rt23w06r10	5	NIC20.1586	NIC20	Taiwan	23	6/03/15	10	15	293	520.656667	0.07239908	0.047723087	0.12918364	0.05023448	0
wormd20150603s115JU1345NIC20rt23w06r11	5	NIC20.1586	NIC20	Taiwan	23	6/03/15	11	14	283	503.844828	0.09170293	0.047723087	0.19466501	0.05023448	1
wormd20150603s115JU1345NIC20rt23w06r12	5	NIC20.1586	NIC20	Taiwan	23	6/03/15	12	13	293	467.78	0.04926819	0.047723087	0.0617732	0.05023448	0
wormd20150603s115JU1345NIC20rt23w06r13	5	NIC20.1586	NIC20	Taiwan	23	6/03/15	13	12	293	479.393333	0.04772309	0.047723087	0.05023448	0.05023448	0
wormd20150603s115JU1345NIC20rt23w06r14	5	NIC20.1586	NIC20	Taiwan	23	6/03/15	14	11	290	529.474747	0.06223064	0.047723087	0.10452163	0.05023448	0
wormd20150603s115JU1345NIC20rt23w06r15	5	NIC20.1586	NIC20	Taiwan	23	6/03/15	15	10	293	452.83	0.05405602	0.047723087	0.05352833	0.05023448	0
wormd20150603s115JU1345NIC20rt23w06r16	5	NIC20.1586	NIC20	Taiwan	23	6/03/15	16	9	293	417.296667	0.06806627	0.047723087	0.07810849	0.05023448	0
wormd20150603s115JU1345NIC20rt23w06r17	5	NIC20.1586	NIC20	Taiwan	23	6/03/15	17	8	293	413.796667	0.06765706	0.047723087	0.06802372	0.05023448	0
wormd20150603s115JU1345NIC20rt23w10r00	9	NIC20.1587	NIC20	Taiwan	23	6/03/15	0	25	259	467.612782	0.56871583	0.056843705	0.66309159	0.058025263	1
wormd20150603s115JU1345NIC20rt23w10r01	9	NIC20.1587	NIC20	Taiwan	23	6/03/15	1	24	256	452.155894	0.58991777	0.056843705	0.70508233	0.058025263	1
wormd20150603s115JU1345NIC20rt23w10r02	9	NIC20.1587	NIC20	Taiwan	23	6/03/15	2	23	218	456.675556	0.56154439	0.056843705	0.62179258	0.058025263	1
wormd20150603s115JU1345NIC20rt23w10r03	9	NIC20.1587	NIC20	Taiwan	23	6/03/15	3	22	226	463.317597	0.52141599	0.056843705	0.54963933	0.058025263	1
wormd20150603s115JU1345NIC20rt23w10r04	9	NIC20.1587	NIC20	Taiwan	23	6/03/15	4	21	257	479.693182	0.51142462	0.056843705	0.62906524	0.058025263	1
wormd20150603s115JU1345NIC20rt23w10r05	9	NIC20.1587	NIC20	Taiwan	23	6/03/15	5	20	228	453.33617	0.53865205	0.056843705	0.63340571	0.058025263	1
wormd20150603s115JU1345NIC20rt23w10r06	9	NIC20.1587	NIC20	Taiwan	23	6/03/15	6	19	161	459.714286	0.44874754	0.056843705	0.75038992	0.058025263	1
wormd20150603s115JU1345NIC20rt23w10r08	9	NIC20.1587	NIC20	Taiwan	23	6/03/15	8	17	293	444.736667	0.24816033	0.056843705	0.69650534	0.058025263	1
wormd20150603s115JU1345NIC20rt23w10r09	9	NIC20.1587	NIC20	Taiwan	23	6/03/15	9	16	274	449.58363	0.1500137	0.056843705	0.47187735	0.058025263	1
wormd20150603s115JU1345NIC20rt23w10r10	9	NIC20.1587	NIC20	Taiwan	23	6/03/15	10	15	293	436.216667	0.11143306	0.056843705	0.30106461	0.058025263	1
wormd20150603s115JU1345NIC20rt23w10r11	9	NIC20.1587	NIC20	Taiwan	23	6/03/15	11	14	292	439.442953	0.09233719	0.056843705	0.19490954	0.058025263	1
wormd20150603s115JU1345NIC20rt23w10r12	9	NIC20.1587	NIC20	Taiwan	23	6/03/15	12	13	293	411.433333	0.0568437	0.056843705	0.06645157	0.058025263	0
wormd20150603s115JU1345NIC20rt23w10r13	9	NIC20.1587	NIC20	Taiwan	23	6/03/15	13	12	293	426.403333	0.07166161	0.056843705	0.07353171	0.058025263	0
wormd20150603s115JU1345NIC20rt23w10r14	9	NIC20.1587	NIC20	Taiwan	23	6/03/15	14	11	293	431.286667	0.05855705	0.056843705	0.05802526	0.058025263	0
wormd20150603s115JU1345NIC20rt23w10r15	9	NIC20.1587	NIC20	Taiwan	23	6/03/15	15	10	293	428.413333	0.07925276	0.056843705	0.08159245	0.058025263	0
wormd20150603s115JU1345NIC20rt23w10r16	9	NIC20.1587	NIC20	Taiwan	23	6/03/15	16	9	293	439.873333	0.08050822	0.056843705	0.08065647	0.058025263	0
wormd20150603s115JU1345NIC20rt23w10r17	9	NIC20.1587	NIC20	Taiwan	23	6/03/15	17	8	293	437.06	0.08020529	0.056843705	0.07975551	0.058025263	0
wormd20150603s115JU1345NIC20rt23w12r00	11	NIC20.1589	NIC20	Taiwan	23	6/03/15	0	25	282	540.775087	0.4771077	0.048068356	0.51591686	0.048019444	1
wormd20150603s115JU1345NIC20rt23w12r01	11	NIC20.1589	NIC20	Taiwan	23	6/03/15	1	24	160	542.475904	0.41911095	0.048068356	0.58095596	0.048019444	1
wormd20150603s115JU1345NIC20rt23w12r02	11	NIC20.1589	NIC20	Taiwan	23	6/03/15	2	23	203	553.012876	0.4453554	0.048068356	0.50298203	0.048019444	1
wormd20150603s115JU1345NIC20rt23w12r03	11	NIC20.1589	NIC20	Taiwan	23	6/03/15	3	22	197	494.746411	0.43744497	0.048068356	0.53093026	0.048019444	1
wormd20150603s115JU1345NIC20rt23w12r04	11	NIC20.1589	NIC20	Taiwan	23	6/03/15	4	21	269	571.477032	0.38955186	0.048068356	0.56962708	0.048019444	1
wormd20150603s115JU1345NIC20rt23w12r05	11	NIC20.1589	NIC20	Taiwan	23	6/03/15	5	20	239	569.098039	0.41625245	0.048068356	0.67028769	0.048019444	1
wormd20150603s115JU1345NIC20rt23w12r06	11	NIC20.1589	NIC20	Taiwan	23	6/03/15	6	19	285	553.280822	0.27793447	0.048068356	0.64139569	0.048019444	1
wormd20150603s115JU1345NIC20rt23w12r07	11	NIC20.1589	NIC20	Taiwan	23	6/03/15	7	18	103	577.021898	0.29845375	0.048068356	0.65099165	0.048019444	1
wormd20150603s115JU1345NIC20rt23w12r08	11	NIC20.1589	NIC20	Taiwan	23	6/03/15	8	17	101	505.471698	0.27729805	0.048068356	0.68516364	0.048019444	1
wormd20150603s115JU1345NIC20rt23w12r09	11	NIC20.1589	NIC20	Taiwan	23	6/03/15	9	16	283	513.321678	0.11025946	0.048068356	0.26245443	0.048019444	1
wormd20150603s115JU1345NIC20rt23w12r10	11	NIC20.1589	NIC20	Taiwan	23	6/03/15	10	15	293	511.69	0.07484875	0.048068356	0.12344867	0.048019444	0
wormd20150603s115JU1345NIC20rt23w12r11	11	NIC20.1589	NIC20	Taiwan	23	6/03/15	11	14	282	547.802768	0.07061932	0.048068356	0.11967377	0.048019444	0
wormd20150603s115JU1345NIC20rt23w12r12	11	NIC20.1589	NIC20	Taiwan	23	6/03/15	12	13	264	466.243542	0.05229985	0.048068356	0.05934513	0.048019444	0
wormd20150603s115JU1345NIC20rt23w12r13	11	NIC20.1589	NIC20	Taiwan	23	6/03/15	13	12	293	487.67	0.07318577	0.048068356	0.08515622	0.048019444	0
wormd20150603s115JU1345NIC20rt23w12r14	11	NIC20.1589	NIC20	Taiwan	23	6/03/15	14	11	279	479.335664	0.04806836	0.048068356	0.04801944	0.048019444	0
wormd20150603s115JU1345NIC20rt23w12r15	11	NIC20.1589	NIC20	Taiwan	23	6/03/15	15	10	293	512.63	0.05965192	0.048068356	0.06341215	0.048019444	0
wormd20150603s115JU1345NIC20rt23w12r16	11	NIC20.1589	NIC20	Taiwan	23	6/03/15	16	9	287	507.959184	0.04864104	0.048068356	0.04867607	0.048019444	0
wormd20150603s115JU1345NIC20rt23w12r17	11	NIC20.1589	NIC20	Taiwan	23	6/03/15	17	8	293	541.426667	0.05545847	0.048068356	0.0559855	0.048019444	0
wormd20150603s115JU1345NIC20rt23w16r00	15	NIC20.1590	NIC20	Taiwan	23	6/03/15	0	25	215	581.90991	0.46098455	0.075576704	0.60355848	0.07633635	1
wormd20150603s115JU1345NIC20rt23w16r01	15	NIC20.1590	NIC20	Taiwan	23	6/03/15	1	24	208	603.406393	0.42338181	0.075576704	0.53730158	0.07633635	1
wormd20150603s115JU1345NIC20rt23w16r02	15	NIC20.1590	NIC20	Taiwan	23	6/03/15	2	23	242	581.628159	0.44333034	0.075576704	0.55159694	0.07633635	1
wormd20150603s115JU1345NIC20rt23w16r03	15	NIC20.1590	NIC20	Taiwan	23	6/03/15	3	22	224	583.204724	0.4252508	0.075576704	0.6150804	0.07633635	1
wormd20150603s115JU1345NIC20rt23w16r04	15	NIC20.1590	NIC20	Taiwan	23	6/03/15	4	21	179	583.074257	0.35859046	0.075576704	0.5478014	0.07633635	1
wormd20150603s115JU1345NIC20rt23w16r05	15	NIC20.1590	NIC20	Taiwan	23	6/03/15	5	20	161	542.382514	0.30932821	0.075576704	0.53557759	0.07633635	1
wormd20150603s115JU1345NIC20rt23w16r06	15	NIC20.1590	NIC20	Taiwan	23	6/03/15	6	19	193	566.643902	0.31543553	0.075576704	0.6430117	0.07633635	1
wormd20150603s115JU1345NIC20rt23w16r07	15	NIC20.1590	NIC20	Taiwan	23	6/03/15	7	18	293	569.876667	0.19751431	0.075576704	0.57207078	0.07633635	1
wormd20150603s115JU1345NIC20rt23w16r08	15	NIC20.1590	NIC20	Taiwan	23	6/03/15	8	17	131	501.828221	0.21232859	0.075576704	0.56606721	0.07633635	1
wormd20150603s115JU1345NIC20rt23w16r09	15	NIC20.1590	NIC20	Taiwan	23	6/03/15	9	16	155	497.755814	0.11390415	0.075576704	0.24911506	0.07633635	1
wormd20150603s115JU1345NIC20rt23w16r10	15	NIC20.1590	NIC20	Taiwan	23	6/03/15	10	15	137	660.75	0.15541628	0.075576704	0.34603494	0.07633635	1
wormd20150603s115JU1345NIC20rt23w16r11	15	NIC20.1590	NIC20	Taiwan	23	6/03/15	11	14	264	490.413284	0.11267052	0.075576704	0.18911038	0.07633635	1
wormd20150603s115JU1345NIC20rt23w16r17	15	NIC20.1590	NIC20	Taiwan	23	6/03/15	17	8	121	147.125984	0.0755767	0.075576704	0.07633635	0.07633635	0
wormd20150603s115JU1345NIC20rt23w17r00	16	NIC20.1591	NIC20	Taiwan	23	6/03/15	0	25	241	609.988327	0.36984918	0.060196766	0.45567446	0.059552203	1
wormd20150603s115JU1345NIC20rt23w17r01	16	NIC20.1591	NIC20	Taiwan	23	6/03/15	1	24	245	643.072	0.43469741	0.060196766	0.51921078	0.059552203	1
wormd20150603s115JU1345NIC20rt23w17r02	16	NIC20.1591	NIC20	Taiwan	23	6/03/15	2	23	205	584.438914	0.38062435	0.060196766	0.40989697	0.059552203	1
wormd20150603s115JU1345NIC20rt23w17r03	16	NIC20.1591	NIC20	Taiwan	23	6/03/15	3	22	140	611.864865	0.37401571	0.060196766	0.57339784	0.059552203	1
wormd20150603s115JU1345NIC20rt23w17r05	16	NIC20.1591	NIC20	Taiwan	23	6/03/15	5	20	251	208.693798	0.24226246	0.060196766	0.25605049	0.059552203	1
wormd20150603s115JU1345NIC20rt23w17r06	16	NIC20.1591	NIC20	Taiwan	23	6/03/15	6	19	290	266.811448	0.16711515	0.060196766	0.1676506	0.059552203	1
wormd20150603s115JU1345NIC20rt23w17r07	16	NIC20.1591	NIC20	Taiwan	23	6/03/15	7	18	293	314.283333	0.12903234	0.060196766	0.12765653	0.059552203	0
wormd20150603s115JU1345NIC20rt23w17r08	16	NIC20.1591	NIC20	Taiwan	23	6/03/15	8	17	293	349.366667	0.10576741	0.060196766	0.10689364	0.059552203	0
wormd20150603s115JU1345NIC20rt23w17r09	16	NIC20.1591	NIC20	Taiwan	23	6/03/15	9	16	293	376.793333	0.09596454	0.060196766	0.09790694	0.059552203	0
wormd20150603s115JU1345NIC20rt23w17r10	16	NIC20.1591	NIC20	Taiwan	23	6/03/15	10	15	293	408.54	0.09018381	0.060196766	0.09045112	0.059552203	0
wormd20150603s115JU1345NIC20rt23w17r11	16	NIC20.1591	NIC20	Taiwan	23	6/03/15	11	14	293	430.623333	0.07914997	0.060196766	0.0802392	0.059552203	0
wormd20150603s115JU1345NIC20rt23w17r12	16	NIC20.1591	NIC20	Taiwan	23	6/03/15	12	13	293	448.283333	0.0722317	0.060196766	0.07149315	0.059552203	0
wormd20150603s115JU1345NIC20rt23w17r13	16	NIC20.1591	NIC20	Taiwan	23	6/03/15	13	12	293	466.876667	0.07259518	0.060196766	0.07312423	0.059552203	0
wormd20150603s115JU1345NIC20rt23w17r14	16	NIC20.1591	NIC20	Taiwan	23	6/03/15	14	11	293	495.25	0.06019677	0.060196766	0.0595522	0.059552203	0
wormd20150603s115JU1345NIC20rt23w17r15	16	NIC20.1591	NIC20	Taiwan	23	6/03/15	15	10	293	477.666667	0.07036838	0.060196766	0.07004179	0.059552203	0
wormd20150603s115JU1345NIC20rt23w17r16	16	NIC20.1591	NIC20	Taiwan	23	6/03/15	16	9	293	488.603333	0.06866787	0.060196766	0.0682156	0.059552203	0
wormd20150603s115JU1345NIC20rt23w17r17	16	NIC20.1591	NIC20	Taiwan	23	6/03/15	17	8	293	504.936667	0.06778474	0.060196766	0.06770556	0.059552203	0
wormd20150603s115JU1345NIC20rt23w18r00	17	NIC20.1592	NIC20	Taiwan	23	6/03/15	0	25	202	504.083333	0.42732424	0.06728564	0.4960855	0.072878879	1
wormd20150603s115JU1345NIC20rt23w18r01	17	NIC20.1592	NIC20	Taiwan	23	6/03/15	1	24	142	286.124138	0.23390552	0.06728564	0.28154849	0.072878879	1
wormd20150603s115JU1345NIC20rt23w18r02	17	NIC20.1592	NIC20	Taiwan	23	6/03/15	2	23	187	287.324742	0.23001314	0.06728564	0.29007364	0.072878879	1
wormd20150603s115JU1345NIC20rt23w18r03	17	NIC20.1592	NIC20	Taiwan	23	6/03/15	3	22	171	236.88764	0.21397685	0.06728564	0.2180697	0.072878879	1
wormd20150603s115JU1345NIC20rt23w18r04	17	NIC20.1592	NIC20	Taiwan	23	6/03/15	4	21	120	372.879032	0.28132271	0.06728564	0.41657246	0.072878879	1
wormd20150603s115JU1345NIC20rt23w18r05	17	NIC20.1592	NIC20	Taiwan	23	6/03/15	5	20	220	125.960177	0.07032446	0.06728564	0.08812463	0.072878879	0
wormd20150603s115JU1345NIC20rt23w18r06	17	NIC20.1592	NIC20	Taiwan	23	6/03/15	6	19	226	430.888412	0.25596582	0.06728564	0.41036093	0.072878879	1
wormd20150603s115JU1345NIC20rt23w18r07	17	NIC20.1592	NIC20	Taiwan	23	6/03/15	7	18	134	138.673759	0.08201053	0.06728564	0.11397245	0.072878879	0
wormd20150603s115JU1345NIC20rt23w18r08	17	NIC20.1592	NIC20	Taiwan	23	6/03/15	8	17	288	514.332203	0.19834978	0.06728564	0.53317178	0.072878879	1
wormd20150603s115JU1345NIC20rt23w18r09	17	NIC20.1592	NIC20	Taiwan	23	6/03/15	9	16	269	539.32971	0.16053986	0.06728564	0.40352847	0.072878879	1
wormd20150603s115JU1345NIC20rt23w18r10	17	NIC20.1592	NIC20	Taiwan	23	6/03/15	10	15	175	613.725275	0.13799711	0.06728564	0.29956035	0.072878879	1
wormd20150603s115JU1345NIC20rt23w18r11	17	NIC20.1592	NIC20	Taiwan	23	6/03/15	11	14	248	551.658824	0.11677975	0.06728564	0.20512037	0.072878879	1
wormd20150603s115JU1345NIC20rt23w18r12	17	NIC20.1592	NIC20	Taiwan	23	6/03/15	12	13	275	451.503546	0.06728564	0.06728564	0.07600457	0.072878879	0
wormd20150603s115JU1345NIC20rt23w18r13	17	NIC20.1592	NIC20	Taiwan	23	6/03/15	13	12	227	599.240343	0.08320174	0.06728564	0.11269225	0.072878879	0
wormd20150603s115JU1345NIC20rt23w18r14	17	NIC20.1592	NIC20	Taiwan	23	6/03/15	14	11	293	521.436667	0.07039555	0.06728564	0.07287888	0.072878879	0
wormd20150603s115JU1345NIC20rt23w18r15	17	NIC20.1592	NIC20	Taiwan	23	6/03/15	15	10	290	548.505051	0.12318276	0.06728564	0.1284861	0.072878879	0
wormd20150603s115JU1345NIC20rt23w18r16	17	NIC20.1592	NIC20	Taiwan	23	6/03/15	16	9	293	378.286667	0.09112888	0.06728564	0.0907776	0.072878879	0
wormd20150603s115JU1345NIC20rt23w18r17	17	NIC20.1592	NIC20	Taiwan	23	6/03/15	17	8	293	381.24	0.09685383	0.06728564	0.09742035	0.072878879	0
wormd20150524s131NIC20QR24rt28w01r00	0	NIC20.1509	NIC20	Taiwan	28	5/24/15	0	25.03423265	293	537.653333	0.49057555	0.064262368	0.62033163	0.063700301	1
wormd20150524s131NIC20QR24rt28w01r01	0	NIC20.1509	NIC20	Taiwan	28	5/24/15	1	26.09545714	281	544.159722	0.5799877	0.064262368	0.71142981	0.063700301	1
wormd20150524s131NIC20QR24rt28w01r02	0	NIC20.1509	NIC20	Taiwan	28	5/24/15	2	27.15668163	189	464.586735	0.42043024	0.064262368	0.56130086	0.063700301	1
wormd20150524s131NIC20QR24rt28w01r03	0	NIC20.1509	NIC20	Taiwan	28	5/24/15	3	28.21790612	127	319.798507	0.32265718	0.064262368	0.39332849	0.063700301	1
wormd20150524s131NIC20QR24rt28w01r04	0	NIC20.1509	NIC20	Taiwan	28	5/24/15	4	29.27913061	197	522.788177	0.40434653	0.064262368	0.60821886	0.063700301	1
wormd20150524s131NIC20QR24rt28w01r05	0	NIC20.1509	NIC20	Taiwan	28	5/24/15	5	30.3403551	236	522.079498	0.44666441	0.064262368	0.65481926	0.063700301	1
wormd20150524s131NIC20QR24rt28w01r06	0	NIC20.1509	NIC20	Taiwan	28	5/24/15	6	31.40157959	108	328.327434	0.33595612	0.064262368	0.44746817	0.063700301	1
wormd20150524s131NIC20QR24rt28w01r07	0	NIC20.1509	NIC20	Taiwan	28	5/24/15	7	32.46280408	237	530.963115	0.30390323	0.064262368	0.69475801	0.063700301	1
wormd20150524s131NIC20QR24rt28w01r09	0	NIC20.1509	NIC20	Taiwan	28	5/24/15	9	34.58525306	229	501.75	0.12212001	0.064262368	0.45445994	0.063700301	1
wormd20150524s131NIC20QR24rt28w01r10	0	NIC20.1509	NIC20	Taiwan	28	5/24/15	10	35.64647755	293	453.493333	0.07084267	0.064262368	0.07168483	0.063700301	0
wormd20150524s131NIC20QR24rt28w01r11	0	NIC20.1509	NIC20	Taiwan	28	5/24/15	11	36.70770204	293	443.096667	0.07286801	0.064262368	0.07278547	0.063700301	0
wormd20150524s131NIC20QR24rt28w01r12	0	NIC20.1509	NIC20	Taiwan	28	5/24/15	12	37.76892653	293	436.226667	0.06924862	0.064262368	0.06879641	0.063700301	0
wormd20150524s131NIC20QR24rt28w01r13	0	NIC20.1509	NIC20	Taiwan	28	5/24/15	13	38.83015102	293	438.903333	0.06895654	0.064262368	0.06830733	0.063700301	0
wormd20150524s131NIC20QR24rt28w01r14	0	NIC20.1509	NIC20	Taiwan	28	5/24/15	14	39.89137551	293	440.05	0.06647963	0.064262368	0.0662257	0.063700301	0
wormd20150524s131NIC20QR24rt28w01r15	0	NIC20.1509	NIC20	Taiwan	28	5/24/15	15	40.9526	293	446.876667	0.06426237	0.064262368	0.0637003	0.063700301	0
wormd20150524s131NIC20QR24rt28w02r00	1	NIC20.1510	NIC20	Taiwan	28	5/24/15	0	25.03423265	290	506.801347	0.44432421	0.059711203	0.46473639	0.059203526	1
wormd20150524s131NIC20QR24rt28w02r02	1	NIC20.1510	NIC20	Taiwan	28	5/24/15	2	27.15668163	171	492.494253	0.46139741	0.059711203	0.53460189	0.059203526	1
wormd20150524s131NIC20QR24rt28w02r03	1	NIC20.1510	NIC20	Taiwan	28	5/24/15	3	28.21790612	157	352.687117	0.29918906	0.059711203	0.36399087	0.059203526	1
wormd20150524s131NIC20QR24rt28w02r04	1	NIC20.1510	NIC20	Taiwan	28	5/24/15	4	29.27913061	184	444.752632	0.45601447	0.059711203	0.6062786	0.059203526	1
wormd20150524s131NIC20QR24rt28w02r05	1	NIC20.1510	NIC20	Taiwan	28	5/24/15	5	30.3403551	153	513.666667	0.35886932	0.059711203	0.57320098	0.059203526	1
wormd20150524s131NIC20QR24rt28w02r06	1	NIC20.1510	NIC20	Taiwan	28	5/24/15	6	31.40157959	110	305.201754	0.19557587	0.059711203	0.34857215	0.059203526	1
wormd20150524s131NIC20QR24rt28w02r07	1	NIC20.1510	NIC20	Taiwan	28	5/24/15	7	32.46280408	288	510.376271	0.34421044	0.059711203	0.61570634	0.059203526	1
wormd20150524s131NIC20QR24rt28w02r08	1	NIC20.1510	NIC20	Taiwan	28	5/24/15	8	33.52402857	157	453.908163	0.07154922	0.059711203	0.11251003	0.059203526	0
[truncated: 65,340 more rows]
